# Supplementary material for: SILAC-Based Proteomic Profiling of the Human MDA-MB-231 Metastatic Breast Cancer Cell Line in Response to the Two Antitumoral Lactoferrin Isoforms: The Secreted Lactoferrin and the Intracellular Delta-Lactoferrin
Source: PLoS One. 2014 Aug 12;9(8):e104563. doi: 10.1371/journal.pone.0104563 (PMC4130549; doi:10.1371/journal.pone.0104563)
Supplement: Table S2 — List of nuclear proteins identified when low doses of Lf isoforms are used. (XLSX) [file pone.0104563.s004.xlsx]

## Sheet: Sheet1
AC	ID	MW	Description	#Peptides	Score
O14874	BCKD_HUMAN	46616.3	[3-methyl-2-oxobutanoate dehydrogenase [lipoamide]] kinase, mitochondrial	2	109.1
P61604	CH10_HUMAN	10924.9	10 kDa heat shock protein, mitochondrial	7	607.74
Q15029	U5S1_HUMAN	110336	116 kDa U5 small nuclear ribonucleoprotein component	37	5399.79
Q9NRX4	PHP14_HUMAN	13994.8	14 kDa phosphohistidine phosphatase	6	512.84
P31946	1433B_HUMAN	28178.9	14-3-3 protein beta/alpha	11	1064.32
P62258	1433E_HUMAN	29326.5	14-3-3 protein epsilon	15	2845.26
Q04917	1433F_HUMAN	28372.1	14-3-3 protein eta	9	740.59
P61981	1433G_HUMAN	28456	14-3-3 protein gamma	6	755.57
P31947	1433S_HUMAN	27870.7	14-3-3 protein sigma	7	588.29
P27348	1433T_HUMAN	28031.9	14-3-3 protein theta	16	1939.22
P63104	1433Z_HUMAN	27898.8	14-3-3 protein zeta/delta	13	1831.39
O60613	SEP15_HUMAN	18236.1	15 kDa selenoprotein	4	489.01
P62191	PRS4_HUMAN	49324.8	26S protease regulatory subunit 4	2	87.07
P43686	PRS6B_HUMAN	47450.6	26S protease regulatory subunit 6B	2	103.47
P35998	PRS7_HUMAN	49002.3	26S protease regulatory subunit 7	2	137.43
P62333	PRS10_HUMAN	44430.2	26S protease regulatory subunit S10B	3	186.65
Q99460	PSMD1_HUMAN	106795	26S proteasome non-ATPase regulatory subunit 1	3	133.47
O00232	PSD12_HUMAN	53269.7	26S proteasome non-ATPase regulatory subunit 12	3	136.47
O00487	PSDE_HUMAN	34725.6	26S proteasome non-ATPase regulatory subunit 14	2	64.92
O00233	PSMD9_HUMAN	24809.5	26S proteasome non-ATPase regulatory subunit 9	4	231.8
Q13442	HAP28_HUMAN	20617.6	28 kDa heat- and acid-stable phosphoprotein	5	321.4
Q9Y6G3	RM42_HUMAN	16935.4	28S ribosomal protein L42, mitochondrial	2	83.05
P82912	RT11_HUMAN	20774	28S ribosomal protein S11, mitochondrial	3	365.18
O15235	RT12_HUMAN	15562.2	28S ribosomal protein S12, mitochondrial	2	67.73
O60783	RT14_HUMAN	15243.1	28S ribosomal protein S14, mitochondrial	2	298.34
P82914	RT15_HUMAN	29937.5	28S ribosomal protein S15, mitochondrial	3	208.98
Q9Y3D3	RT16_HUMAN	15563.1	28S ribosomal protein S16, mitochondrial	1	132.91
Q9Y676	RT18B_HUMAN	29719.1	28S ribosomal protein S18b, mitochondrial	2	196.95
Q9Y3D5	RT18C_HUMAN	16238.4	28S ribosomal protein S18c, mitochondrial	1	107.68
Q9Y399	RT02_HUMAN	33513.2	28S ribosomal protein S2, mitochondrial	3	148.16
P82921	RT21_HUMAN	10905.5	28S ribosomal protein S21, mitochondrial	4	392.03
P82650	RT22_HUMAN	41425.5	28S ribosomal protein S22, mitochondrial	1	191.43
Q9Y3D9	RT23_HUMAN	21814.3	28S ribosomal protein S23, mitochondrial	4	312.67
P82663	RT25_HUMAN	20331.3	28S ribosomal protein S25, mitochondrial	1	55.68
Q9BYN8	RT26_HUMAN	24253.9	28S ribosomal protein S26, mitochondrial	7	489.85
Q9Y2Q9	RT28_HUMAN	21000.9	28S ribosomal protein S28, mitochondrial	2	212.81
P51398	RT29_HUMAN	45879.8	28S ribosomal protein S29, mitochondrial	2	77.87
P82930	RT34_HUMAN	25691.5	28S ribosomal protein S34, mitochondrial	5	304.25
P82673	RT35_HUMAN	37106.2	28S ribosomal protein S35, mitochondrial	2	152.86
P82909	RT36_HUMAN	11459	28S ribosomal protein S36, mitochondrial	5	659.09
P82675	RT05_HUMAN	48489.3	28S ribosomal protein S5, mitochondrial	2	174.44
P82932	RT06_HUMAN	14274.6	28S ribosomal protein S6, mitochondrial	2	80.08
Q9Y2R9	RT07_HUMAN	28258	28S ribosomal protein S7, mitochondrial	3	254.9
P82933	RT09_HUMAN	46033.8	28S ribosomal protein S9, mitochondrial	1	80.25
P42126	D3D2_HUMAN	33080.3	3,2-trans-enoyl-CoA isomerase, mitochondrial	3	283.42
Q9Y3B2	EXOS1_HUMAN	21780.1	3'-5' exoribonuclease CSL4 homolog	7	1463.58
Q8WXF0	SRR35_HUMAN	30664.7	35 kDa SR repressor protein	3	437
Q9BYD6	RM01_HUMAN	37113.5	39S ribosomal protein L1, mitochondrial	5	258.26
Q7Z7H8	RM10_HUMAN	29491.8	39S ribosomal protein L10, mitochondrial	2	205.6
Q9Y3B7	RM11_HUMAN	20727.5	39S ribosomal protein L11, mitochondrial	7	578.57
P52815	RM12_HUMAN	21562.7	39S ribosomal protein L12, mitochondrial	5	562.06
Q9BYD1	RM13_HUMAN	20735.7	39S ribosomal protein L13, mitochondrial	8	868.75
Q6P1L8	RM14_HUMAN	16165.5	39S ribosomal protein L14, mitochondrial	4	995.67
Q9NX20	RM16_HUMAN	28488	39S ribosomal protein L16, mitochondrial	4	300.58
Q9NRX2	RM17_HUMAN	20094.6	39S ribosomal protein L17, mitochondrial	6	263.95
Q9H0U6	RM18_HUMAN	20791.6	39S ribosomal protein L18, mitochondrial	3	578.95
P49406	RM19_HUMAN	33798.7	39S ribosomal protein L19, mitochondrial	5	750.56
Q5T653	RM02_HUMAN	33564.8	39S ribosomal protein L2, mitochondrial	5	287.2
Q9BYC9	RM20_HUMAN	17602.6	39S ribosomal protein L20, mitochondrial	4	824.85
Q7Z2W9	RM21_HUMAN	22971.4	39S ribosomal protein L21, mitochondrial	7	746.09
Q9NWU5	RM22_HUMAN	23796.7	39S ribosomal protein L22, mitochondrial	6	1153.77
Q96A35	RM24_HUMAN	25013	39S ribosomal protein L24, mitochondrial	5	201.41
Q9P0M9	RM27_HUMAN	16119.8	39S ribosomal protein L27, mitochondrial	4	418.17
Q13084	RM28_HUMAN	30251.9	39S ribosomal protein L28, mitochondrial	5	273.53
P09001	RM03_HUMAN	38893.2	39S ribosomal protein L3, mitochondrial	4	307.77
Q9BYC8	RM32_HUMAN	21733.2	39S ribosomal protein L32, mitochondrial	4	366.66
Q9BQ48	RM34_HUMAN	10158.6	39S ribosomal protein L34, mitochondrial	2	207.64
Q9BZE1	RM37_HUMAN	48600.3	39S ribosomal protein L37, mitochondrial	3	221.99
Q96DV4	RM38_HUMAN	44967.5	39S ribosomal protein L38, mitochondrial	4	191.33
Q9NYK5	RM39_HUMAN	39209.9	39S ribosomal protein L39, mitochondrial	5	176.2
Q9BYD3	RM04_HUMAN	34954.4	39S ribosomal protein L4, mitochondrial	2	144.32
Q9NQ50	RM40_HUMAN	24475.2	39S ribosomal protein L40, mitochondrial	2	139
Q8IXM3	RM41_HUMAN	15430	39S ribosomal protein L41, mitochondrial	6	263.37
Q9H9J2	RM44_HUMAN	37853.8	39S ribosomal protein L44, mitochondrial	2	200.91
Q9BRJ2	RM45_HUMAN	35613.2	39S ribosomal protein L45, mitochondrial	5	220.63
Q9H2W6	RM46_HUMAN	31799.5	39S ribosomal protein L46, mitochondrial	6	406.74
Q9HD33	RM47_HUMAN	29603	39S ribosomal protein L47, mitochondrial	5	387.79
Q13405	RM49_HUMAN	19243	39S ribosomal protein L49, mitochondrial	4	758.17
Q8N5N7	RM50_HUMAN	18484.4	39S ribosomal protein L50, mitochondrial	7	1256.12
Q96EL3	RM53_HUMAN	12270.2	39S ribosomal protein L53, mitochondrial	3	356.53
Q7Z7F7	RM55_HUMAN	15119.1	39S ribosomal protein L55, mitochondrial	5	637.21
Q9BYD2	RM09_HUMAN	30395.5	39S ribosomal protein L9, mitochondrial	4	412.74
Q15125	EBP_HUMAN	26563.8	3-beta-hydroxysteroid-Delta(8),Delta(7)-isomerase	3	384.12
Q5XJ04	Q5XJ04_HUMAN	57853.6	3-hydroxy-3-methylglutaryl-Coenzyme A synthase 1 (Soluble)	4	298.37
Q99714	HCD2_HUMAN	27134.2	3-hydroxyacyl-CoA dehydrogenase type-2	9	670.24
P46783	RS10_HUMAN	18885.9	40S ribosomal protein S10	7	1414.5
P62280	RS11_HUMAN	18590.1	40S ribosomal protein S11	11	1619.42
P25398	RS12_HUMAN	14904.6	40S ribosomal protein S12	9	1139.51
P62277	RS13_HUMAN	17211.7	40S ribosomal protein S13	6	1477.56
P62263	RS14_HUMAN	16433.6	40S ribosomal protein S14	11	2255.61
P62244	RS15A_HUMAN	14944	40S ribosomal protein S15a	8	1987.14
P62249	RS16_HUMAN	16549.1	40S ribosomal protein S16	10	1986.55
P08708	RS17_HUMAN	15597.4	40S ribosomal protein S17	7	1084.82
P62269	RS18_HUMAN	17707.9	40S ribosomal protein S18	13	2380.41
P39019	RS19_HUMAN	16050.5	40S ribosomal protein S19	6	1004.74
P15880	RS2_HUMAN	31589.7	40S ribosomal protein S2	10	865.6
P60866	RS20_HUMAN	13478.4	40S ribosomal protein S20	4	423.09
P63220	RS21_HUMAN	9219.61	40S ribosomal protein S21	9	2770.88
P62266	RS23_HUMAN	15968.8	40S ribosomal protein S23	4	677.89
P62847	RS24_HUMAN	15413.4	40S ribosomal protein S24	5	575.25
P62851	RS25_HUMAN	13790.7	40S ribosomal protein S25	4	542.76
P42677	RS27_HUMAN	9796.96	40S ribosomal protein S27	5	690.24
Q71UM5	RS27L_HUMAN	9813	40S ribosomal protein S27-like protein	4	611.58
P62857	RS28_HUMAN	7893.22	40S ribosomal protein S28	2	1119.88
P62273	RS29_HUMAN	6900.39	40S ribosomal protein S29	3	2037.48
P23396	RS3_HUMAN	26842.5	40S ribosomal protein S3	14	2004.94
P62861	RS30_HUMAN	6643.82	40S ribosomal protein S30	2	583.13
P62701	RS4X_HUMAN	29807.1	40S ribosomal protein S4, X isoform	14	1662.25
P46782	RS5_HUMAN	23033.1	40S ribosomal protein S5	10	1846.98
P62081	RS7_HUMAN	22113.3	40S ribosomal protein S7	9	986.82
P62241	RS8_HUMAN	24475.3	40S ribosomal protein S8	11	978.35
P46781	RS9_HUMAN	22634.6	40S ribosomal protein S9	12	1467.39
P08865	RSSA_HUMAN	32947.5	40S ribosomal protein SA	11	2216
Q13131	AAPK1_HUMAN	63395.1	5'-AMP-activated protein kinase catalytic subunit alpha-1	2	109.14
Q9UPN4	AZI1_HUMAN	122443	5-azacytidine-induced protein 1	12	664.1
Q9H857	NT5D2_HUMAN	61021.8	5'-nucleotidase domain-containing protein 2	2	157.25
P10809	CH60_HUMAN	61187.4	60 kDa heat shock protein, mitochondrial	28	4209.86
P05386	RLA1_HUMAN	11620.7	60S acidic ribosomal protein P1	3	1286.28
P05387	RLA2_HUMAN	11657.9	60S acidic ribosomal protein P2	8	2813.44
P27635	RL10_HUMAN	25044	60S ribosomal protein L10	3	303.95
P62906	RL10A_HUMAN	24986.6	60S ribosomal protein L10a	10	1698.23
P62913	RL11_HUMAN	20467.7	60S ribosomal protein L11	8	1085.33
P30050	RL12_HUMAN	17978.6	60S ribosomal protein L12	7	2814.58
Q6NZ55	Q6NZ55_HUMAN	24307.5	60S ribosomal protein L13	9	807.48
P40429	RL13A_HUMAN	23619.4	60S ribosomal protein L13a	5	477.88
P61313	RL15_HUMAN	24245.1	60S ribosomal protein L15	11	608.88
P18621	RL17_HUMAN	21611.4	60S ribosomal protein L17	8	1231.56
Q07020	RL18_HUMAN	21735.1	60S ribosomal protein L18	7	2214.86
Q02543	RL18A_HUMAN	21034	60S ribosomal protein L18a	10	1103.49
P46778	RL21_HUMAN	18610.1	60S ribosomal protein L21	6	556.74
Q6P5R6	RL22L_HUMAN	14597.6	60S ribosomal protein L22-like 1	2	605.15
P62829	RL23_HUMAN	14970.1	60S ribosomal protein L23	6	1167.11
P62750	RL23A_HUMAN	17684.1	60S ribosomal protein L23a	7	894.39
P83731	RL24_HUMAN	17881.9	60S ribosomal protein L24	7	946.83
P61254	RL26_HUMAN	17247.5	60S ribosomal protein L26	10	699.18
Q9UNX3	RL26L_HUMAN	17245.5	60S ribosomal protein L26-like 1	9	778.47
B2R4D8	B2R4D8_HUMAN	15759.7	60S ribosomal protein L27	2	111.13
P61353	RL27_HUMAN	15787.8	60S ribosomal protein L27	4	762.39
P46776	RL27A_HUMAN	16665.1	60S ribosomal protein L27a	4	640.62
P46779	RL28_HUMAN	15794.7	60S ribosomal protein L28	6	585.92
P39023	RL3_HUMAN	46364.9	60S ribosomal protein L3	7	508.52
P62899	RL31_HUMAN	14453.9	60S ribosomal protein L31	2	218.56
P62910	RL32_HUMAN	15963.9	60S ribosomal protein L32	8	977.54
P49207	RL34_HUMAN	13512.6	60S ribosomal protein L34	3	245.42
P42766	RL35_HUMAN	14542.6	60S ribosomal protein L35	2	418.33
P18077	RL35A_HUMAN	12586.8	60S ribosomal protein L35a	7	432.9
Q9Y3U8	RL36_HUMAN	12302.9	60S ribosomal protein L36	6	1184.91
P83881	RL36A_HUMAN	12717.9	60S ribosomal protein L36a	3	167.09
P61513	RL37A_HUMAN	10496.6	60S ribosomal protein L37a	4	409.79
P63173	RL38_HUMAN	8269.75	60S ribosomal protein L38	8	2984.67
P36578	RL4_HUMAN	47952.5	60S ribosomal protein L4	16	1493.01
P46777	RL5_HUMAN	34568.8	60S ribosomal protein L5	9	1259.47
Q8TBK5	Q8TBK5_HUMAN	32778.6	60S ribosomal protein L6	10	1555.31
Q8N5Z7	Q8N5Z7_HUMAN	32762.7	60S ribosomal protein L6	3	378.02
P18124	RL7_HUMAN	29264.2	60S ribosomal protein L7	14	790.25
P62424	RL7A_HUMAN	30148.1	60S ribosomal protein L7a	15	2712.28
Q6DKI1	RL7L_HUMAN	28757.1	60S ribosomal protein L7-like 1	9	706.61
P62917	RL8_HUMAN	28235.4	60S ribosomal protein L8	10	721.04
P32969	RL9_HUMAN	21963.8	60S ribosomal protein L9	6	1203.26
Q9Y221	NIP7_HUMAN	20620.6	60S ribosome subunit biogenesis protein NIP7 homolog	9	1139.42
B4DQJ8	B4DQJ8_HUMAN	52352.4	6-phosphogluconate dehydrogenase, decarboxylating	4	176.53
O95336	6PGL_HUMAN	27814.7	6-phosphogluconolactonase	3	367.49
P36639	8ODP_HUMAN	22651.1	7,8-dihydro-8-oxoguanine triphosphatase	1	53.16
P11021	GRP78_HUMAN	72402.5	78 kDa glucose-regulated protein	18	2264.72
O60318	MCM3A_HUMAN	220662	80 kDa MCM3-associated protein	10	466.27
Q9NUJ1	ABHDA_HUMAN	34252.9	Abhydrolase domain-containing protein 10, mitochondrial	2	295.56
Q59EH3	Q59EH3_HUMAN	19142.3	Acid phosphatase 1 isoform c variant (Fragment)	5	904.26
Q53F35	Q53F35_HUMAN	28826.3	Acidic (Leucine-rich) nuclear phosphoprotein 32 family, member B variant (Fragment)	9	742.16
P39687	AN32A_HUMAN	28682.3	Acidic leucine-rich nuclear phosphoprotein 32 family member A	9	817.7
Q9BTT0	AN32E_HUMAN	30901.9	Acidic leucine-rich nuclear phosphoprotein 32 family member E	6	528.13
A2A274	A2A274_HUMAN	88563.3	Aconitase 2, mitochondrial	1	149.06
Q2LE71	Q2LE71_HUMAN	20779.4	Actin related protein 2/3 complex	8	1127.31
P68032	ACTC_HUMAN	42334	Actin, alpha cardiac muscle 1	15	9391.34
P62736	ACTA_HUMAN	42381	Actin, aortic smooth muscle	6	688.87
P63261	ACTG_HUMAN	42107.9	Actin, cytoplasmic 2	29	25683.2
Q562Z4	Q562Z4_HUMAN	11548	Actin-like protein (Fragment)	2	329.02
Q562M3	Q562M3_HUMAN	11528.9	Actin-like protein (Fragment)	3	1770.41
O96019	ACL6A_HUMAN	47943.5	Actin-like protein 6A	10	1545.75
P61160	ARP2_HUMAN	45017.3	Actin-related protein 2	12	1588.49
Q92747	ARC1A_HUMAN	42112.9	Actin-related protein 2/3 complex subunit 1A	4	210.68
O15143	ARC1B_HUMAN	41721.7	Actin-related protein 2/3 complex subunit 1B	1	81.24
O15144	ARPC2_HUMAN	34425.5	Actin-related protein 2/3 complex subunit 2	13	1686.96
P59998	ARPC4_HUMAN	19768.3	Actin-related protein 2/3 complex subunit 4	7	931.91
O15511	ARPC5_HUMAN	16367.3	Actin-related protein 2/3 complex subunit 5	4	441.1
Q9BPX5	ARP5L_HUMAN	16930.8	Actin-related protein 2/3 complex subunit 5-like protein	4	460.06
P61158	ARP3_HUMAN	47797.2	Actin-related protein 3	13	959.33
Q9GZN1	ARP6_HUMAN	46236.9	Actin-related protein 6	3	212.88
P53999	TCP4_HUMAN	14386.4	Activated RNA polymerase II transcriptional coactivator p15	7	1744.1
B2RMP1	B2RMP1_HUMAN	52123.5	Activating transcription factor 7	3	222.39
Q9ULW3	ABT1_HUMAN	31117	Activator of basal transcription 1	2	137.33
Q86WX3	AROS_HUMAN	15538.4	Active regulator of SIRT1	6	857.22
O14561	ACPM_HUMAN	17577	Acyl carrier protein, mitochondrial	5	624.82
Q709F0	ACD11_HUMAN	88026.1	Acyl-CoA dehydrogenase family member 11	1	179.54
Q9H845	ACAD9_HUMAN	69344	Acyl-CoA dehydrogenase family member 9, mitochondrial	13	589.57
P07108	ACBP_HUMAN	10038	Acyl-CoA-binding protein	3	123.88
A8K6X8	A8K6X8_HUMAN	75151.3	Acyl-Coenzyme A oxidase 1, palmitoyl, isoform CRA_b	1	102.72
Q9NPJ3	ACO13_HUMAN	15064.9	Acyl-coenzyme A thioesterase 13	1	132.43
P07311	ACYP1_HUMAN	11253.9	Acylphosphatase-1	2	119.51
O75608	LYPA1_HUMAN	24995.6	Acyl-protein thioesterase 1	1	213.11
O95372	LYPA2_HUMAN	25062.8	Acyl-protein thioesterase 2	3	172.06
Q05DK5	Q05DK5_HUMAN	79239.4	ADD2 protein (Fragment)	6	428.9
A2A3N8	A2A3N8_HUMAN	73914.2	Adducin 1 (Alpha)	16	1111.84
Q5VU09	Q5VU09_HUMAN	75965.7	Adducin 3 (Gamma)	4	443.85
P07741	APT_HUMAN	19766.5	Adenine phosphoribosyltransferase	7	573.69
Q59EC0	Q59EC0_HUMAN	139001	Adenosine deaminase, RNA-specific isoform ADAR-a variant (Fragment)	34	3496.33
P23526	SAHH_HUMAN	48255.4	Adenosylhomocysteinase	9	392.85
P54819	KAD2_HUMAN	26688.9	Adenylate kinase 2, mitochondrial	7	963.6
P00568	KAD1_HUMAN	21735.3	Adenylate kinase isoenzyme 1	4	413.84
P30520	PURA2_HUMAN	50464.9	Adenylosuccinate synthetase isozyme 2	1	98.33
B2RDY9	B2RDY9_HUMAN	51867.8	Adenylyl cyclase-associated protein	8	627.42
Q6IQ32	ADNP2_HUMAN	124294	ADNP homeobox protein 2	1	96.29
P12235	ADT1_HUMAN	33271.3	ADP/ATP translocase 1	19	2002.14
P05141	ADT2_HUMAN	33102.2	ADP/ATP translocase 2	23	9524.34
P12236	ADT3_HUMAN	33073.3	ADP/ATP translocase 3	20	2904.29
P84077	ARF1_HUMAN	20740.7	ADP-ribosylation factor 1	7	826.33
P18085	ARF4_HUMAN	20611.7	ADP-ribosylation factor 4	8	1028.7
P84085	ARF5_HUMAN	20630.6	ADP-ribosylation factor 5	8	743.71
Q5U025	Q5U025_HUMAN	20312.5	ADP-ribosylation factor 6	4	474.6
P40616	ARL1_HUMAN	20518.5	ADP-ribosylation factor-like protein 1	3	145.2
P36404	ARL2_HUMAN	21035.9	ADP-ribosylation factor-like protein 2	6	432.91
Q9Y2Y0	AR2BP_HUMAN	18867.1	ADP-ribosylation factor-like protein 2-binding protein	2	297.69
P36405	ARL3_HUMAN	20613.8	ADP-ribosylation factor-like protein 3	6	381.2
Q9NVJ2	ARL8B_HUMAN	21753.2	ADP-ribosylation factor-like protein 8B	4	161.16
Q13795	ARFRP_HUMAN	23055.6	ADP-ribosylation factor-related protein 1	1	92.82
P10109	ADX_HUMAN	19665.7	Adrenodoxin, mitochondrial	2	178.83
Q9UHB7	AFF4_HUMAN	127781	AF4/FMR2 family member 4	2	96.03
O43488	ARK72_HUMAN	40019.9	Aflatoxin B1 aldehyde reductase member 2	1	89.41
Q2TSD2	Q2TSD2_HUMAN	41778.2	Aging-associated gene 7 protein	11	1712.35
O43823	AKAP8_HUMAN	76631.3	A-kinase anchor protein 8	8	827.9
Q9NRG9	AAAS_HUMAN	60391.7	Aladin	19	2380.17
Q8N5L8	CI023_HUMAN	17791.2	Alba-like protein C9orf23	2	208.24
Q5T567	Q5T567_HUMAN	87775.7	Aldehyde dehydrogenase 18 family, member A1	10	987.33
Q6P6C2	ALKB5_HUMAN	52061.3	Alkylated DNA repair protein alkB homolog 5	4	443.6
Q9BQI0	AIF1L_HUMAN	17113.6	Allograft inflammatory factor 1-like	3	220.42
P12814	ACTN1_HUMAN	103563	Alpha-actinin-1	30	3630.24
O43707	ACTN4_HUMAN	105245	Alpha-actinin-4	46	7030.31
P06733	ENOA_HUMAN	47481.4	Alpha-enolase	17	1940.97
Q12800	TFCP2_HUMAN	57675.9	Alpha-globin transcription factor CP2	8	874.67
Q16352	AINX_HUMAN	55528.5	Alpha-internexin	2	88.57
Q9NVD7	PARVA_HUMAN	42274.4	Alpha-parvin	1	51.06
P54920	SNAA_HUMAN	33667.4	Alpha-soluble NSF attachment protein	8	344.53
B7ZMD7	B7ZMD7_HUMAN	58401.2	Amylase, alpha 1A (Salivary)	8	1590.22
Q9BS18	APC13_HUMAN	8516.1	Anaphase-promoting complex subunit 13	1	60.04
Q9UJX3	APC7_HUMAN	63720.1	Anaphase-promoting complex subunit 7	5	509.78
Q4VCS5	AMOT_HUMAN	118469	Angiomotin	9	509.86
Q9P0K7	RAI14_HUMAN	110601	Ankycorbin	17	1228.87
P04083	ANXA1_HUMAN	38918.1	Annexin A1	17	2246.35
P07355	ANXA2_HUMAN	38807.9	Annexin A2	15	1416.76
P08758	ANXA5_HUMAN	35971.4	Annexin A5	9	826.78
P46013	KI67_HUMAN	360698	Antigen KI-67	82	6146.51
Q10567	AP1B1_HUMAN	105452	AP-1 complex subunit beta-1	5	367.31
P61966	AP1S1_HUMAN	18948.7	AP-1 complex subunit sigma-1A	2	132.86
O95782	AP2A1_HUMAN	108570	AP-2 complex subunit alpha-1	7	316.33
O94973	AP2A2_HUMAN	104807	AP-2 complex subunit alpha-2	2	49.23
Q96CW1	AP2M1_HUMAN	49965.2	AP-2 complex subunit mu-1	2	112.47
P53680	AP2S1_HUMAN	17177.8	AP-2 complex subunit sigma-1	1	102
Q92572	AP3S1_HUMAN	21946.2	AP-3 complex subunit sigma-1	2	412.3
P02647	APOA1_HUMAN	30758.9	Apolipoprotein A-I	1	83.61
Q59GY0	Q59GY0_HUMAN	25635.4	Apolipoprotein B mRNA editing enzyme, catalytic polypeptide-like 3C variant (Fragment)	1	74.65
P02649	APOE_HUMAN	36245.8	Apolipoprotein E	2	57.88
Q9BUR5	APOO_HUMAN	22384.6	Apolipoprotein O	3	584.97
Q6UXV4	APOOL_HUMAN	29311.3	Apolipoprotein O-like	13	1611.71
Q9BZZ5	API5_HUMAN	57867.3	Apoptosis inhibitor 5	1	56.3
Q07812	BAX_HUMAN	21284.8	Apoptosis regulator BAX	9	727.39
O95831	AIFM1_HUMAN	67144	Apoptosis-inducing factor 1, mitochondrial	14	1305.04
Q9UKV3	ACINU_HUMAN	152196	Apoptotic chromatin condensation inducer in the nucleus	16	1489.64
Q7Z2E3	APTX_HUMAN	41113.3	Aprataxin	1	65.57
Q9NWB6	ARGL1_HUMAN	33196.8	Arginine and glutamate-rich protein 1	3	93.21
Q8N2F6	ARM10_HUMAN	37858.7	Armadillo repeat-containing protein 10	4	184.72
Q9H6L4	ARMC7_HUMAN	22195.4	Armadillo repeat-containing protein 7	1	88.15
Q9UH62	ARMX3_HUMAN	42816	Armadillo repeat-containing X-linked protein 3	1	136
O43776	SYNC_HUMAN	63757.8	Asparaginyl-tRNA synthetase, cytoplasmic	2	157.81
B4DJA6	B4DJA6_HUMAN	43302.1	Aspartate aminotransferase	3	500.21
P14868	SYDC_HUMAN	57499.2	Aspartyl-tRNA synthetase, cytoplasmic	2	72.32
Q6SPF0	SAMD1_HUMAN	56188.7	Atherin	4	274.16
Q8WYP5	AHTF1_HUMAN	255242	AT-hook-containing transcription factor 1	26	1893.9
Q6IBA3	Q6IBA3_HUMAN	7553.78	ATOX1 protein	2	116.17
A8KA31	A8KA31_HUMAN	32917.3	ATP synthase gamma chain	6	767.27
Q5TC12	ATPF1_HUMAN	36755.8	ATP synthase mitochondrial F1 complex assembly factor 1	1	72.69
Q5SAB0	Q5SAB0_HUMAN	8057.13	ATP synthase protein 8	2	710.77
A4GWW2	A4GWW2_HUMAN	24820.8	ATP synthase subunit a	1	144.92
P25705	ATPA_HUMAN	59827.6	ATP synthase subunit alpha, mitochondrial	20	3707.67
P24539	AT5F1_HUMAN	28947.4	ATP synthase subunit b, mitochondrial	12	819
P06576	ATPB_HUMAN	56524.6	ATP synthase subunit beta, mitochondrial	26	3906.72
O75947	ATP5H_HUMAN	18536.5	ATP synthase subunit d, mitochondrial	9	1399.6
P30049	ATPD_HUMAN	17479.2	ATP synthase subunit delta, mitochondrial	2	755.26
P56385	ATP5I_HUMAN	7928.33	ATP synthase subunit e, mitochondrial	5	953.15
Q5VTU8	AT5EL_HUMAN	5860.21	ATP synthase subunit epsilon-like protein, mitochondrial	2	97.04
P56134	ATPK_HUMAN	11024.7	ATP synthase subunit f, mitochondrial	2	175.28
O75964	ATP5L_HUMAN	11421.2	ATP synthase subunit g, mitochondrial	7	1523.07
P36542	ATPG_HUMAN	33032.3	ATP synthase subunit gamma, mitochondrial	6	862.7
P48047	ATPO_HUMAN	23376.7	ATP synthase subunit O, mitochondrial	9	1412.74
Q9NW81	AT5SL_HUMAN	29631.9	ATP synthase subunit s-like protein	4	101.99
P18859	ATP5J_HUMAN	12579.6	ATP synthase-coupling factor 6, mitochondrial	5	1106.16
Q8NBU5	ATAD1_HUMAN	41060.1	ATPase family AAA domain-containing protein 1	8	1445.66
Q6PL18	ATAD2_HUMAN	159825	ATPase family AAA domain-containing protein 2	1	55.96
Q9NVI7	ATD3A_HUMAN	71609.8	ATPase family AAA domain-containing protein 3A	22	1768.88
Q5T9A4	ATD3B_HUMAN	73097.5	ATPase family AAA domain-containing protein 3B	9	650.28
Q5SV24	Q5SV24_HUMAN	64489.4	ATPase family, AAA domain containing 3A (Fragment)	19	1252.32
Q9NRK6	ABCBA_HUMAN	79497.1	ATP-binding cassette sub-family B member 10, mitochondrial	7	605.92
P28288	ABCD3_HUMAN	75940.8	ATP-binding cassette sub-family D member 3	8	700.99
P61221	ABCE1_HUMAN	68240.4	ATP-binding cassette sub-family E member 1	4	145.35
Q2L6I2	Q2L6I2_HUMAN	92079.6	ATP-binding cassette sub-family F (GCN20) member 1	5	325.14
Q8NE71	ABCF1_HUMAN	96322.6	ATP-binding cassette sub-family F member 1	13	1155.55
Q75MJ1	Q75MJ1_HUMAN	73024.5	ATP-binding cassette, sub-family F (GCN20), member 2, isoform CRA_d	5	140.11
O76031	CLPX_HUMAN	69922	ATP-dependent Clp protease ATP-binding subunit clpX-like, mitochondrial	1	60.01
P12956	KU70_HUMAN	70084.2	ATP-dependent DNA helicase 2 subunit 1	33	4186.39
P13010	KU86_HUMAN	83222.5	ATP-dependent DNA helicase 2 subunit 2	34	3134.42
Q96TA2	YMEL1_HUMAN	86686	ATP-dependent metalloprotease YME1L1	7	533.85
Q08211	DHX9_HUMAN	142181	ATP-dependent RNA helicase A	60	10436.7
Q92499	DDX1_HUMAN	83349.1	ATP-dependent RNA helicase DDX1	19	1682.32
Q9NVP1	DDX18_HUMAN	75701.6	ATP-dependent RNA helicase DDX18	19	1664.72
Q9NUU7	DD19A_HUMAN	54397	ATP-dependent RNA helicase DDX19A	10	683.07
Q9GZR7	DDX24_HUMAN	96898.7	ATP-dependent RNA helicase DDX24	6	519.18
O00148	DDX39_HUMAN	49611.2	ATP-dependent RNA helicase DDX39	21	2302.49
B5BTY4	B5BTY4_HUMAN	73525.1	ATP-dependent RNA helicase DDX3X	37	7544.29
Q86XP3	DDX42_HUMAN	103197	ATP-dependent RNA helicase DDX42	14	970.43
B5BUE6	B5BUE6_HUMAN	69590.9	ATP-dependent RNA helicase DDX5 (Fragment)	31	3554.5
Q9BQ39	DDX50_HUMAN	83084.3	ATP-dependent RNA helicase DDX50	7	697.29
Q8N8A6	DDX51_HUMAN	72982.8	ATP-dependent RNA helicase DDX51	11	581.67
Q8TDD1	DDX54_HUMAN	98819.3	ATP-dependent RNA helicase DDX54	11	795.51
Q7Z478	DHX29_HUMAN	156222	ATP-dependent RNA helicase DHX29	2	110.14
Q68CP9	ARID2_HUMAN	198921	AT-rich interactive domain-containing protein 2	1	84.24
Q99856	ARI3A_HUMAN	62907	AT-rich interactive domain-containing protein 3A	7	587.82
Q8IVW6	ARI3B_HUMAN	60713.8	AT-rich interactive domain-containing protein 3B	9	692.02
O15392	BIRC5_HUMAN	16721.2	Baculoviral IAP repeat-containing protein 5	7	1199.75
O95816	BAG2_HUMAN	23928.3	BAG family molecular chaperone regulator 2	5	553.39
O43491	E41L2_HUMAN	113032	Band 4.1-like protein 2	25	2276.63
O75531	BAF_HUMAN	10280.1	Barrier-to-autointegration factor	8	1656.07
P35613	BASI_HUMAN	42573.2	Basigin	3	323.65
Q53HT6	Q53HT6_HUMAN	28001	B-cell receptor-associated protein 31 variant (Fragment)	7	589.92
Q96LW7	BINCA_HUMAN	26029.2	Bcl10-interacting CARD protein	3	283.33
Q16611	BAK_HUMAN	23507.9	Bcl-2 homologous antagonist/killer	4	432.74
Q6W2J9	BCOR_HUMAN	193609	BCL-6 corepressor	10	380.16
B7ZM58	B7ZM58_HUMAN	105999	BCLAF1 protein	27	3081.4
Q5T5X7	BEND3_HUMAN	95555.8	BEN domain-containing protein 3	9	440.67
O15155	BET1_HUMAN	13394.9	BET1 homolog	1	88.19
Q53GK6	Q53GK6_HUMAN	42037.8	Beta actin variant (Fragment)	28	24272.8
B3VL05	B3VL05_HUMAN	11535.9	Beta globin (Fragment)	2	95.55
A6XND9	A6XND9_HUMAN	11798	Beta-2-microglobulin	1	88.5
Q13425	SNTB2_HUMAN	58369.2	Beta-2-syntrophin	1	317.11
Q9UE89	Q9UE89_HUMAN	7907.92	Beta-actin (Fragment)	7	7267.05
Q562R1	ACTBL_HUMAN	42318.1	Beta-actin-like protein 2	11	5002.05
P35612	ADDB_HUMAN	81259.6	Beta-adducin	2	69.75
A8MZ11	A8MZ11_HUMAN	73164.6	Beta-galactosidase	2	99.34
P07686	HEXB_HUMAN	63527.3	Beta-hexosaminidase subunit beta	1	70.93
P13995	MTDC_HUMAN	38042.3	Bifunctional methylenetetrahydrofolate dehydrogenase/cyclohydrolase, mitochondrial	4	151.97
Q96T60	PNKP_HUMAN	57553.7	Bifunctional polynucleotide phosphatase/kinase	7	580.78
P31939	PUR9_HUMAN	65088.5	Bifunctional purine biosynthesis protein PURH	4	230.18
P53004	BIEA_HUMAN	33692.4	Biliverdin reductase A	2	49.2
Q6QNY1	BL1S2_HUMAN	16008.1	Biogenesis of lysosome-related organelles complex 1 subunit 2	1	78.1
Q9H3K6	BOLA2_HUMAN	10281.2	BolA-like protein 2	3	497.61
Q53S33	BOLA3_HUMAN	12163.4	BolA-like protein 3	2	261.55
Q53HL2	BOREA_HUMAN	31417.9	Borealin	8	968.44
P80723	BASP_HUMAN	22680	Brain acid soluble protein 1	11	900.2
O95258	UCP5_HUMAN	36349.3	Brain mitochondrial carrier protein 1	1	75.99
Q5R3B4	Q5R3B4_HUMAN	11730.2	Brain protein 44 (Fragment)	6	681.42
Q9Y5U8	BR44L_HUMAN	12510.3	Brain protein 44-like protein	2	164.19
A0AVN2	A0AVN2_HUMAN	88028.4	BRCA1 associated RING domain 1	3	54.76
Q9P287	BCCIP_HUMAN	36298.8	BRCA2 and CDKN1A-interacting protein	2	72.17
Q8WY22	BRI3B_HUMAN	27931.9	BRI3-binding protein	3	553.77
Q9H7B2	BXDC1_HUMAN	35731.2	Brix domain-containing protein 1	10	964.46
Q8TDN6	BXDC2_HUMAN	41660.1	Brix domain-containing protein 2	14	1767.8
Q9NRL2	BAZ1A_HUMAN	180246	Bromodomain adjacent to zinc finger domain protein 1A	34	2946.29
Q9UIF9	BAZ2A_HUMAN	210169	Bromodomain adjacent to zinc finger domain protein 2A	9	423.98
Q9ULD4	BRPF3_HUMAN	137313	Bromodomain and PHD finger-containing protein 3	4	246.03
Q9NSI6	BRWD1_HUMAN	265493	Bromodomain and WD repeat-containing protein 1	1	66.08
A6ZJA4	A6ZJA4_HUMAN	135383	Bromodomain containing 1	2	146.3
P25440	BRD2_HUMAN	88291.4	Bromodomain-containing protein 2	7	310.34
Q15059	BRD3_HUMAN	79777.2	Bromodomain-containing protein 3	2	94.39
Q9H0E9	BRD8_HUMAN	136077	Bromodomain-containing protein 8	1	74.81
Q9H3F6	KCD10_HUMAN	35809	BTB/POZ domain-containing protein KCTD10	1	56.89
Q13895	BYST_HUMAN	49798.1	Bystin	11	1215.08
B7ZKT8	B7ZKT8_HUMAN	131494	C11orf30 protein	2	60.19
Q96G68	Q96G68_HUMAN	4468.31	C1orf151 protein (Fragment)	2	412.18
Q49AP7	Q49AP7_HUMAN	10732.6	C1orf212 protein	1	68.06
O75844	FACE1_HUMAN	55062.6	CAAX prenyl protease 1 homolog	3	279.83
A9UL12	A9UL12_HUMAN	88761.6	Cactin	2	105.11
P27708	PYR1_HUMAN	245167	CAD protein	1	50.83
Q9UDQ3	Q9UDQ3_HUMAN	85369.3	Calcium channel; match to P54289 (PID:g1705852) (Fragment)	2	63.58
Q8IWX8	CHERP_HUMAN	104078	Calcium homeostasis endoplasmic reticulum protein	7	567.16
B7ZKY0	B7ZKY0_HUMAN	103012	Calcium/calmodulin-dependent serine protein kinase (MAGUK family)	3	73.22
Q9UJS0	CMC2_HUMAN	74527.8	Calcium-binding mitochondrial carrier protein Aralar2	23	2201.66
Q6NUK1	SCMC1_HUMAN	53548.4	Calcium-binding mitochondrial carrier protein SCaMC-1	16	2092.88
Q9H9S4	CB39L_HUMAN	39233.8	Calcium-binding protein 39-like	1	144.4
Q9HB71	CYBP_HUMAN	26307.7	Calcyclin-binding protein	9	804.68
Q05682	CALD1_HUMAN	93251.5	Caldesmon	5	357.71
P04632	CPNS1_HUMAN	28468.8	Calpain small subunit 1	8	650.65
Q15417	CNN3_HUMAN	36561.8	Calponin-3	4	302.36
P27797	CALR_HUMAN	48282.9	Calreticulin	7	928.53
P17612	KAPCA_HUMAN	40678	cAMP-dependent protein kinase catalytic subunit alpha	1	61.45
P10644	KAP0_HUMAN	43183.1	cAMP-dependent protein kinase type I-alpha regulatory subunit	3	132.43
P13861	KAP2_HUMAN	45832.1	cAMP-dependent protein kinase type II-alpha regulatory subunit	11	717.63
Q5EE01	CUG2_HUMAN	10225.9	Cancer-up-regulated gene 2 protein	2	139.25
Q14444	CAPR1_HUMAN	78489.1	Caprin-1	10	592.25
P00918	CAH2_HUMAN	29284.9	Carbonic anhydrase 2	1	83.85
P16152	CBR1_HUMAN	30641	Carbonyl reductase [NADPH] 1	5	495.47
Q53EZ1	Q53EZ1_HUMAN	47583.3	Casein kinase 1 epsilon variant (Fragment)	2	79.18
Q5SRQ6	Q5SRQ6_HUMAN	27307.1	Casein kinase 2 beta polypeptide	5	769.04
P48729	KC1A_HUMAN	39118	Casein kinase I isoform alpha	8	425.87
P48730	KC1D_HUMAN	47585.3	Casein kinase I isoform delta	2	298.37
P68400	CSK21_HUMAN	45228.8	Casein kinase II subunit alpha	10	867.62
P19784	CSK22_HUMAN	41358.2	Casein kinase II subunit alpha'	4	169.6
P31944	CASPE_HUMAN	27947.1	Caspase-14	1	210.65
P42574	CASP3_HUMAN	32043.7	Caspase-3	2	66.75
P35221	CTNA1_HUMAN	100693	Catenin alpha-1	16	846.49
P35222	CTNB1_HUMAN	86069.4	Catenin beta-1	11	501.55
O60716	CTND1_HUMAN	108674	Catenin delta-1	3	172.39
Q0VAM0	Q0VAM0_HUMAN	65560.2	Catenin, beta like 1	9	552.7
P07339	CATD_HUMAN	45036.8	Cathepsin D	6	856.83
Q9UBR2	CATZ_HUMAN	34530.5	Cathepsin Z	3	334.5
Q7Z4F3	Q7Z4F3_HUMAN	17170.8	Caveolin	2	59.68
P17676	CEBPB_HUMAN	36482.3	CCAAT/enhancer-binding protein beta	1	304.35
P53567	CEBPG_HUMAN	16398.5	CCAAT/enhancer-binding protein gamma	1	164.05
Q03701	CEBPZ_HUMAN	121540	CCAAT/enhancer-binding protein zeta	23	1444.16
Q6IBT3	Q6IBT3_HUMAN	59804	CCT7 protein	1	53.82
Q6YHK3	CD109_HUMAN	162500	CD109 antigen	9	469.23
O95400	CD2B2_HUMAN	37737.3	CD2 antigen cytoplasmic tail-binding protein 2	2	134.92
B1AP13	B1AP13_HUMAN	50561.1	CD55 molecule, decay accelerating factor for complement (Cromer blood group)	7	421.41
P13987	CD59_HUMAN	14795	CD59 glycoprotein	4	454.27
P60033	CD81_HUMAN	26476.4	CD81 antigen	2	119.49
B9EG64	B9EG64_HUMAN	58276.8	CDC-like kinase 4	2	71.37
Q9NZ45	CISD1_HUMAN	12362.3	CDGSH iron sulfur domain-containing protein 1	5	610.99
Q8N5K1	CISD2_HUMAN	15496.5	CDGSH iron sulfur domain-containing protein 2	4	443.4
P51948	MAT1_HUMAN	36256.5	CDK-activating kinase assembly factor MAT1	1	146.74
Q5SYW4	Q5SYW4_HUMAN	92151.8	CDKN1A interacting zinc finger protein 1 (Fragment)	7	497.38
Q9NXV6	CARF_HUMAN	61473	CDKN2A-interacting protein	6	183.46
Q96HQ2	C2AIL_HUMAN	13244.5	CDKN2AIP N-terminal-like protein	7	1174.5
B3KM98	B3KM98_HUMAN	79410.7	cDNA FLJ10556 fis, clone NT2RP2002479, highly similar to ATP-binding cassette sub-family B member 7, mitochondrial (Fragment)	2	50.14
B3KMB1	B3KMB1_HUMAN	136030	cDNA FLJ10623 fis, clone NT2RP2005520, highly similar to Structural maintenance of chromosome 2-like 1 protein	4	179.28
B3KMC6	B3KMC6_HUMAN	103182	cDNA FLJ10692 fis, clone NT2RP3000361, highly similar to Pre-mRNA-processing factor 6 homolog	17	1368.07
B3KMC9	B3KMC9_HUMAN	109456	cDNA FLJ10711 fis, clone NT2RP3000917, highly similar to 5'-3' exoribonuclease 2 (EC 3.1.11.-)	22	1771.85
B3KME2	B3KME2_HUMAN	47101.2	cDNA FLJ10772 fis, clone NT2RP4000243, highly similar to Cartilage-associated protein	4	227.4
B3KMN2	B3KMN2_HUMAN	36723.7	cDNA FLJ11695 fis, clone HEMBA1005019, highly similar to Homo sapiens SCC-112 protein (SCC-112), mRNA	12	911.18
B3KMV5	B3KMV5_HUMAN	123342	cDNA FLJ12728 fis, clone NT2RP2000040, highly similar to Protein FAM62A	3	201.44
B3KMV8	B3KMV8_HUMAN	75130	cDNA FLJ12766 fis, clone NT2RP2001520, highly similar to Calcium-binding mitochondrial carrier protein Aralar1	11	1007.51
B3KMZ5	B3KMZ5_HUMAN	24913.6	cDNA FLJ13047 fis, clone NT2RP3001383, highly similar to Homo sapiens ADP-ribosylation-like factor 6 interacting protein 6 (ARL6IP6), mRNA	4	652.81
B3KN15	B3KN15_HUMAN	42129.5	cDNA FLJ13198 fis, clone NT2RP3004454, highly similar to Heparan sulfate 2-O-sulfotransferase 1 (EC 2.8.2.-)	3	180.43
B3KN49	B3KN49_HUMAN	40867.6	cDNA FLJ13562 fis, clone PLACE1008080, highly similar to Homo sapiens hexamethylene bis-acetamide inducible 1 (HEXIM1), mRNA	1	60.09
B3KNI2	B3KNI2_HUMAN	62445.4	cDNA FLJ14650 fis, clone NT2RP2002185, highly similar to Ubiquilin-1	3	202.59
B3KNL2	B3KNL2_HUMAN	47602.5	cDNA FLJ14856 fis, clone PLACE1001054, highly similar to RuvB-like 2 (EC 3.6.1.-)	3	184.35
B3KY95	B3KY95_HUMAN	53655	cDNA FLJ16143 fis, clone BRAMY2038516, highly similar to Protein disulfide-isomerase A6 (EC 5.3.4.1)	5	503.86
Q6IB30	Q6IB30_HUMAN	33811.6	cDNA FLJ16189 fis, clone BRTHA2012714, highly similar to Four and a half LIM domains protein 1	3	163.77
Q6ZN40	Q6ZN40_HUMAN	37487.1	cDNA FLJ16459 fis, clone BRCAN2002473, moderately similar to Tropomyosin, fibroblast isoform 2	7	575.68
B3KNS8	B3KNS8_HUMAN	41597.6	cDNA FLJ30322 fis, clone BRACE2006703, highly similar to Surfeit locus protein 6	2	66.47
B3KNT8	B3KNT8_HUMAN	42963.1	cDNA FLJ30458 fis, clone BRACE2009421, highly similar to NUCLEOSOME ASSEMBLY PROTEIN 1-LIKE 1	4	347.53
B3KP47	B3KP47_HUMAN	19897.4	cDNA FLJ31151 fis, clone IMR322001541, highly similar to Probable ribosome biogenesis protein RLP24	2	187.07
B3KPA9	B3KPA9_HUMAN	48176.9	cDNA FLJ31530 fis, clone NT2RI2000578, highly similar to WD repeat protein 12	11	1109.98
Q96MX4	Q96MX4_HUMAN	69208	cDNA FLJ31747 fis, clone NT2RI2007377, highly similar to RNA-BINDING PROTEIN EWS	2	184.43
B3KPJ4	B3KPJ4_HUMAN	50941.6	cDNA FLJ31867 fis, clone NT2RP7001856, highly similar to Polyhomeotic-like protein 2	4	281.92
B3KPJ9	B3KPJ9_HUMAN	98621.7	cDNA FLJ31884 fis, clone NT2RP7002906, highly similar to Homo sapiens heat shock 90 kDa protein 1, alpha (HSPCA), transcript variant 1, mRNA	18	1319.24
B3KPQ9	B3KPQ9_HUMAN	83013.3	cDNA FLJ32076 fis, clone OCBBF1000153, highly similar to DNA-binding protein SATB2	5	490.23
B3KPS2	B3KPS2_HUMAN	14979.6	cDNA FLJ32128 fis, clone PEBLM2000147, highly similar to Homo sapiens trafficking protein particle complex 6B (TRAPPC6B), mRNA	1	130.73
B3KPV5	B3KPV5_HUMAN	76412.2	cDNA FLJ32300 fis, clone PROST2002227, highly similar to U3 small nucleolar ribonucleoprotein protein MPP10 (Fragment)	5	274.78
Q96ME4	Q96ME4_HUMAN	19436.1	cDNA FLJ32471 fis, clone SKNMC2000322, highly similar to Peptidyl-tRNA hydrolase 2, mitochondrial (EC 3.1.1.29)	3	219.01
B3KQ42	B3KQ42_HUMAN	68191.2	cDNA FLJ32781 fis, clone TESTI2002149, highly similar to ZINC FINGER PROTEIN 131	1	48
B3KRA1	B3KRA1_HUMAN	63728.7	cDNA FLJ33914 fis, clone CTONG2016575, highly similar to SON PROTEIN	7	351.87
B3KRJ9	B3KRJ9_HUMAN	58281.4	cDNA FLJ34439 fis, clone HLUNG2001146, highly similar to Splicing factor, arginine/serine-rich 12	5	427.05
B3KRS5	B3KRS5_HUMAN	52478.5	cDNA FLJ34837 fis, clone NT2NE2010632, highly similar to HISTONE DEACETYLASE 2	9	566.33
B3KSX3	B3KSX3_HUMAN	32440.6	cDNA FLJ37224 fis, clone BRAMY2000052, moderately similar to RNA-binding protein Raly	1	130.85
B3KTJ9	B3KTJ9_HUMAN	103493	cDNA FLJ38393 fis, clone FEBRA2007212	15	966.61
B3KTP9	B3KTP9_HUMAN	68458.2	cDNA FLJ38578 fis, clone HCHON2007674, highly similar to NUCLEOLIN	1	78.38
B3KTR5	B3KTR5_HUMAN	49191.1	cDNA FLJ38646 fis, clone HHDPC2006460, highly similar to Homo sapiens cell division cycle associated 7-like (CDCA7L), mRNA	6	318.6
A8MPX7	A8MPX7_HUMAN	20139.4	cDNA FLJ38978 fis, clone NT2RI2004209	2	244.43
B3KU66	B3KU66_HUMAN	60536.5	cDNA FLJ39263 fis, clone OCBBF2009571, highly similar to ATP-dependent RNA helicase A (EC 3.6.1.-)	1	58.13
B3KUF8	B3KUF8_HUMAN	32651.8	cDNA FLJ39753 fis, clone SMINT2018343, highly similar to Synaptic vesicle membrane protein VAT-1homolog (EC 1.-.-.-)	1	74.25
Q8N1H4	Q8N1H4_HUMAN	29297.3	cDNA FLJ40872 fis, clone TUTER2000283, highly similar to Homo sapiens transformer-2-beta (SFRS10) gene	9	4349.18
B3KVR1	B3KVR1_HUMAN	25230.3	cDNA FLJ41124 fis, clone BRACE2014850, highly similar to Small nuclear ribonucleoprotein-associated protein N	10	3447.6
B3KVX4	B3KVX4_HUMAN	102812	cDNA FLJ41694 fis, clone HCHON2001217, highly similar to Cullin-4B	6	267.02
B3KW63	B3KW63_HUMAN	20993.7	cDNA FLJ42295 fis, clone TLIVE2008213, highly similar to DnaJ homolog subfamily B member 11	1	103.5
B3KW79	B3KW79_HUMAN	54423.2	cDNA FLJ42481 fis, clone BRACE2032090, highly similar to Probable serine carboxypeptidase CPVL (EC 3.4.16.-)	4	187.74
B3KWP3	B3KWP3_HUMAN	33769.7	cDNA FLJ43503 fis, clone PEBLM2006215, highly similar to Mitochondrial folate transporter/carrier	2	279.5
B3KWV6	B3KWV6_HUMAN	147082	cDNA FLJ43948 fis, clone TESTI4014924, highly similar to Homo sapiens cytoplasmic FMR1 interacting protein 1 (CYFIP1), transcript variant 1, mRNA	2	77.22
B3KX02	B3KX02_HUMAN	28377	cDNA FLJ44403 fis, clone TUTER2000904, moderately similar to Unc-119 protein homolog (Retinal protein 4)	2	66.41
Q6ZRD3	Q6ZRD3_HUMAN	17662.6	cDNA FLJ44718 fis, clone BRACE3022051	1	118.03
B3KX72	B3KX72_HUMAN	83774.3	cDNA FLJ44920 fis, clone BRAMY3011501, highly similar to Heterogeneous nuclear ribonucleoprotein U	39	7812.29
B3KXU8	B3KXU8_HUMAN	70489.1	cDNA FLJ46087 fis, clone TESTI2009497, highly similar to GPI-anchored protein p137	3	115.35
B3KXW5	B3KXW5_HUMAN	94991.9	cDNA FLJ46199 fis, clone TESTI4007965, highly similar to AP-1 complex subunit gamma-1	1	115.29
B3KXY9	B3KXY9_HUMAN	107381	cDNA FLJ46359 fis, clone TESTI4049786, highly similar to Hexokinase-1 (EC 2.7.1.1)	5	375.37
B3KY04	B3KY04_HUMAN	35993.8	cDNA FLJ46506 fis, clone THYMU3030752, highly similar to BTB/POZ domain-containing protein KCTD12	2	164.85
B3KY11	B3KY11_HUMAN	93518.8	cDNA FLJ46571 fis, clone THYMU3041428, highly similar to Probable ATP-dependent RNA helicase DDX23 (EC 3.6.1.-)	5	368.98
B3KQJ9	B3KQJ9_HUMAN	11585.1	cDNA FLJ46665 fis, clone TRACH3007277, highly similar to Golgi phosphoprotein 3	1	84.82
B4E179	B4E179_HUMAN	43359.2	cDNA FLJ50345, highly similar to Zinc finger protein 326	10	585.6
B4E1X8	B4E1X8_HUMAN	18951.5	cDNA FLJ50401, highly similar to Hematological and neurological expressed1-like protein	3	216.76
B4DM28	B4DM28_HUMAN	72230.3	cDNA FLJ50575, highly similar to U4/U6 small nuclear ribonucleoprotein Prp3	3	130.11
B4DUA9	B4DUA9_HUMAN	20790.1	cDNA FLJ50682, highly similar to Transformer-2 protein homolog	2	238.1
B7Z1N7	B7Z1N7_HUMAN	21984.1	cDNA FLJ50753, highly similar to Sodium/potassium-transporting ATPase subunit beta-3	1	52.24
B4DQZ7	B4DQZ7_HUMAN	122827	cDNA FLJ50838, highly similar to Apoptotic chromatin condensation inducer in thenucleus (Fragment)	35	2887.47
B4DY22	B4DY22_HUMAN	55003.3	cDNA FLJ50914, highly similar to Recombining binding protein suppressor of hairless	4	232.46
B4DJX1	B4DJX1_HUMAN	63056.7	cDNA FLJ50978, highly similar to Dihydrolipoyllysine-residue acetyltransferasecomponent of pyruvate dehydrogenase complex, mitochondrial (EC 2.3.1.12)	1	68.67
B7Z553	B7Z553_HUMAN	23761.4	cDNA FLJ51266, highly similar to Vitronectin	1	67.04
B4DZU7	B4DZU7_HUMAN	30335.7	cDNA FLJ51419, highly similar to RNA-binding protein with serine-rich domain 1	5	1056.16
B4DQZ5	B4DQZ5_HUMAN	135178	cDNA FLJ51634, highly similar to Integrator complex subunit 2	1	63.27
B4DDU8	B4DDU8_HUMAN	31592.1	cDNA FLJ51689, highly similar to RNA-binding protein with serine-rich domain 1	2	119.15
B4DIQ0	B4DIQ0_HUMAN	66033.1	cDNA FLJ51692, highly similar to mRNA capping enzyme	1	101.09
B4E283	B4E283_HUMAN	58215.6	cDNA FLJ51754, highly similar to Apoptosis inhibitor 5	3	202.69
B4E2J2	B4E2J2_HUMAN	16460	cDNA FLJ51755, highly similar to Glutathione S-transferase Mu 3 (EC 2.5.1.18)	2	177.17
B4E3B3	B4E3B3_HUMAN	35665.5	cDNA FLJ51756, highly similar to TATA-box-binding protein	2	62.17
B4DZC0	B4DZC0_HUMAN	117367	cDNA FLJ51771, highly similar to SWI/SNF-related matrix-associatedactin-dependent regulator of chromatin subfamily A member5 (EC 3.6.1.-)	10	374.12
B7Z1R5	B7Z1R5_HUMAN	65036.9	cDNA FLJ51804, highly similar to Vacuolar ATP synthase catalytic subunit A, ubiquitous isoform (EC 3.6.3.14)	5	422.95
B4DFH4	B4DFH4_HUMAN	24531.3	cDNA FLJ51815, highly similar to Homo sapiens casein kinase 1, alpha 1 (CSNK1A1), transcript variant 1, mRNA	3	106.32
B4DGY4	B4DGY4_HUMAN	66763	cDNA FLJ51837, highly similar to Histone acetyltransferase MYST2 (EC 2.3.1.48)	4	181.61
B4DNJ6	B4DNJ6_HUMAN	40094.8	cDNA FLJ51909, highly similar to Serine-threonine kinase receptor-associatedprotein	6	418.85
B4DNW3	B4DNW3_HUMAN	40420.9	cDNA FLJ51914, highly similar to Protein DEK	1	68.32
B7Z8J9	B7Z8J9_HUMAN	23413.6	cDNA FLJ52040, highly similar to Mus musculus BCL2-associated transcription factor 1 (Bclaf1), transcript variant 3, mRNA	4	550.42
B4E2P2	B4E2P2_HUMAN	22653	cDNA FLJ52061, highly similar to Translocon-associated protein subunit gamma	1	460.14
B4DE02	B4DE02_HUMAN	34665.5	cDNA FLJ52120, highly similar to Annexin A4	3	199.23
B7Z322	B7Z322_HUMAN	22306.7	cDNA FLJ52146, highly similar to Grancalcin	1	78.32
B4DEM9	B4DEM9_HUMAN	40075.1	cDNA FLJ52257, highly similar to Polymerase delta-interacting protein 2	2	122.46
B7Z970	B7Z970_HUMAN	62645.1	cDNA FLJ52404, highly similar to Homo sapiens related to CPSF subunits 74 kDa (RC74), mRNA	1	66.95
B7Z342	B7Z342_HUMAN	22463.5	cDNA FLJ52544, highly similar to Homo sapiens tumor protein D52 (TPD52), transcript variant 2, mRNA	5	302.32
B7Z4M0	B7Z4M0_HUMAN	23816.1	cDNA FLJ52565, highly similar to Reticulon-3	1	55.7
B4DDB6	B4DDB6_HUMAN	37234.3	cDNA FLJ52659, highly similar to Heterogeneous nuclear ribonucleoprotein A3	22	18516.9
B4DSU4	B4DSU4_HUMAN	23495.1	cDNA FLJ52741, highly similar to Mus musculus adaptor-related protein complex 1, sigma 2 subunit (Ap1s2), mRNA	1	68.83
B7Z695	B7Z695_HUMAN	46817.2	cDNA FLJ52742, highly similar to Periphilin-1	1	121.27
B4E0K0	B4E0K0_HUMAN	46097.4	cDNA FLJ52820, highly similar to Nucleoporin p58/p45	7	902.62
B4E241	B4E241_HUMAN	14422.3	cDNA FLJ52832, highly similar to Splicing factor, arginine/serine-rich 3	2	231.88
B4E2X2	B4E2X2_HUMAN	28797.8	cDNA FLJ52850, moderately similar to Cold-inducible RNA-binding protein	1	69.37
B4DSU6	B4DSU6_HUMAN	15782.1	cDNA FLJ52975, highly similar to Heterogeneous nuclear ribonucleoproteins C	6	855.33
B4DP52	B4DP52_HUMAN	40892.9	cDNA FLJ53073, highly similar to Spliceosome RNA helicase Bat1 (EC 3.6.1.-)	2	161.18
B4DZW6	B4DZW6_HUMAN	32515.7	cDNA FLJ53118, highly similar to Protein FAM82B	2	55.02
B7Z561	B7Z561_HUMAN	48078.6	cDNA FLJ53154, highly similar to Neutral amino acid transporter A	1	55.5
B4DWR9	B4DWR9_HUMAN	56120.1	cDNA FLJ53227, highly similar to Peptidylprolyl isomerase domain and WDrepeat-containing protein 1 (EC 5.2.1.8)	2	116.29
B4DWX3	B4DWX3_HUMAN	61283	cDNA FLJ53229, highly similar to Importin alpha-7 subunit	11	1083.92
B4DXJ7	B4DXJ7_HUMAN	72716.9	cDNA FLJ53235, highly similar to Caseinolytic peptidase B protein	2	105.18
B7Z2R8	B7Z2R8_HUMAN	137474	cDNA FLJ53324, highly similar to Tight junction protein ZO-2	9	365.03
B4DJU4	B4DJU4_HUMAN	67534.6	cDNA FLJ53344, highly similar to Splicing factor 1	11	658.39
B4DMB1	B4DMB1_HUMAN	67251.4	cDNA FLJ53358, highly similar to Heterogeneous nuclear ribonucleoprotein R	1	127.67
B4DN41	B4DN41_HUMAN	68233.2	cDNA FLJ53366, highly similar to Probable ATP-dependent RNA helicase DDX5 (EC 3.6.1.-)	13	1043.25
B4DGN8	B4DGN8_HUMAN	79919.4	cDNA FLJ53377, highly similar to Procollagen-lysine, 2-oxoglutarate 5-dioxygenase 1 (EC 1.14.11.4)	3	142.36
B7Z6Y7	B7Z6Y7_HUMAN	105959	cDNA FLJ53412, highly similar to DNA-directed RNA polymerase I 135 kDa polypeptide (EC 2.7.7.6)	5	283.87
B4DEG8	B4DEG8_HUMAN	87775	cDNA FLJ53464, highly similar to Threonyl-tRNA synthetase, cytoplasmic (EC 6.1.1.3)	3	112.1
B4DZ28	B4DZ28_HUMAN	113012	cDNA FLJ53577, highly similar to pre-mRNA-splicing factor ATP-dependentRNA helicase DHX16 (EC 3.6.1.-)	3	155.3
B4DSQ5	B4DSQ5_HUMAN	83786.9	cDNA FLJ53608, highly similar to Protein transport protein Sec23A	3	135.31
B4DNM2	B4DNM2_HUMAN	53507.5	cDNA FLJ53629, highly similar to Serine/threonine-protein kinase PFTAIRE-1 (EC 2.7.11.22)	1	49.41
B7Z992	B7Z992_HUMAN	79067.8	cDNA FLJ53698, highly similar to Gelsolin	8	836.1
B4DGR0	B4DGR0_HUMAN	50993.8	cDNA FLJ53886, highly similar to Apoptosis inhibitor 5	10	1134.01
B4DSM5	B4DSM5_HUMAN	62398.6	cDNA FLJ53912, highly similar to Zinc finger protein 512	5	138.67
B4E2B5	B4E2B5_HUMAN	43536.1	cDNA FLJ53959, highly similar to Mitochondrial inner membrane protein	13	1134.93
B4DHA3	B4DHA3_HUMAN	72516.5	cDNA FLJ53988, highly similar to Nucleoporin NDC1	4	194.56
B4DMA2	B4DMA2_HUMAN	79487.2	cDNA FLJ54023, highly similar to Heat shock protein HSP 90-beta	23	1786.16
B7Z4T9	B7Z4T9_HUMAN	55225.7	cDNA FLJ54074, highly similar to T-complex protein 1 subunit eta	1	80.23
B4DQM2	B4DQM2_HUMAN	25588.7	cDNA FLJ54125, highly similar to Cytochrome c oxidase assembly protein COX15	1	52.1
B4DUV0	B4DUV0_HUMAN	18849.8	cDNA FLJ54162, moderately similar to CDP-diacylglycerol--inositol3-phosphatidyltransferase (EC 2.7.8.11)	3	330.5
B4DWA0	B4DWA0_HUMAN	34622.1	cDNA FLJ54188, moderately similar to High mobility group protein HMG-I/HMG-Y	1	176.19
B4E343	B4E343_HUMAN	82319.3	cDNA FLJ54249, highly similar to U3 small nucleolar RNA-associated protein 14 homolog A	2	138.73
B4E1S9	B4E1S9_HUMAN	60091	cDNA FLJ54283, highly similar to Heat shock 70 kDa protein 1	3	295.48
B4DWJ2	B4DWJ2_HUMAN	87436.5	cDNA FLJ54314, highly similar to Glutaminyl-tRNA synthetase (EC 6.1.1.18)	1	55.84
B4DLA6	B4DLA6_HUMAN	93576.3	cDNA FLJ54365, highly similar to DNA replication licensing factor MCM4	23	1984.67
B4DPP6	B4DPP6_HUMAN	72369.7	cDNA FLJ54371, highly similar to Serum albumin	1	88.67
B7Z597	B7Z597_HUMAN	60180.9	cDNA FLJ54373, highly similar to 60 kDa heat shock protein, mitochondrial	1	55.74
B4E2Z6	B4E2Z6_HUMAN	91107.3	cDNA FLJ54404, highly similar to Eukaryotic translation initiation factor 3 subunit 8	2	83.2
B4E3B6	B4E3B6_HUMAN	64170	cDNA FLJ54408, highly similar to Heat shock 70 kDa protein 1	28	7793.93
B4DRM3	B4DRM3_HUMAN	69741.5	cDNA FLJ54492, highly similar to Eukaryotic translation initiation factor 4B	1	68.12
B4DRT2	B4DRT2_HUMAN	49518.2	cDNA FLJ54536, highly similar to Mitochondrial 28S ribosomal protein S27	2	265.77
B4DUD6	B4DUD6_HUMAN	48135.8	cDNA FLJ54551, highly similar to Septin-7	3	227.63
B4DUQ1	B4DUQ1_HUMAN	48708.3	cDNA FLJ54552, highly similar to Heterogeneous nuclear ribonucleoprotein K	21	9350.91
B4DDX1	B4DDX1_HUMAN	28057.8	cDNA FLJ54589, highly similar to Golgi phosphoprotein 3	2	111.74
B4DEI4	B4DEI4_HUMAN	42189.7	cDNA FLJ54595, highly similar to Golgi reassembly-stacking protein 2	2	151
B4DDT3	B4DDT3_HUMAN	54084.1	cDNA FLJ54622, highly similar to Prothrombin (EC 3.4.21.5)	2	79.99
B4DLV0	B4DLV0_HUMAN	77556.1	cDNA FLJ54700, highly similar to Nucleolar protein 10	2	60.15
B7Z401	B7Z401_HUMAN	114556	cDNA FLJ54717, highly similar to Sodium/potassium-transporting ATPase alpha-3 chain (EC 3.6.3.9)	1	64.56
B4E2U9	B4E2U9_HUMAN	116680	cDNA FLJ54748, highly similar to 2-oxoglutarate dehydrogenase E1 component, mitochondrial (EC 1.2.4.2)	3	130.9
B4DRD7	B4DRD7_HUMAN	30060.3	cDNA FLJ54752, highly similar to Poly(rC)-binding protein 2	13	2625.08
B4DVK5	B4DVK5_HUMAN	45693.2	cDNA FLJ54759, highly similar to DNA replication licensing factor MCM5	11	817.59
B4E1U9	B4E1U9_HUMAN	26910.6	cDNA FLJ54776, highly similar to Cell division control protein 42 homolog	5	376.33
B4DTN5	B4DTN5_HUMAN	37841.1	cDNA FLJ54810, highly similar to Homo sapiens polycomb group ring finger 3 (PCGF3), mRNA	1	62.78
B4DE31	B4DE31_HUMAN	69382.4	cDNA FLJ54957, highly similar to Transketolase (EC 2.2.1.1)	7	648.92
B4DM97	B4DM97_HUMAN	38364.8	cDNA FLJ55002, highly similar to Alpha-centractin	1	106.8
B4DN54	B4DN54_HUMAN	28748.5	cDNA FLJ55111, highly similar to Sorting and assembly machinery component 50 homolog	8	925.95
B4DQG4	B4DQG4_HUMAN	40660	cDNA FLJ55138, highly similar to Ras-related GTP-binding protein C	1	65.16
B4DDH8	B4DDH8_HUMAN	51214.3	cDNA FLJ55184, highly similar to Homo sapiens leukocyte receptor cluster (LRC) member 4 (LENG4), mRNA	1	88.41
B7Z287	B7Z287_HUMAN	29772.6	cDNA FLJ55197, highly similar to Protein FAM60A	1	110.71
B4DHH6	B4DHH6_HUMAN	138105	cDNA FLJ55320, highly similar to Sal-like protein 1	2	130.89
B4DMC0	B4DMC0_HUMAN	108998	cDNA FLJ55341, highly similar to 116 kDa U5 small nuclear ribonucleoprotein component	4	313.53
B4DT66	B4DT66_HUMAN	75834.2	cDNA FLJ55367, highly similar to Rattus norvegicus SDA1 domain containing 1 (Sdad1), mRNA	2	124.43
B7Z3R7	B7Z3R7_HUMAN	51180.4	cDNA FLJ55466, highly similar to G-rich sequence factor 1	3	200.88
B4DGE8	B4DGE8_HUMAN	45717.3	cDNA FLJ55467, highly similar to Septin-2	2	101.71
B4DX78	B4DX78_HUMAN	54175.5	cDNA FLJ55484, highly similar to ATP-dependent RNA helicase DDX39 (EC 3.6.1.-)	2	86.43
B4E2A6	B4E2A6_HUMAN	84141.5	cDNA FLJ55508, highly similar to Sad1/unc-84-like protein 2	8	891.44
B4DSG6	B4DSG6_HUMAN	57210	cDNA FLJ55520, highly similar to TFIIH basal transcription factor complex p62 subunit	2	131.03
B4DZR0	B4DZR0_HUMAN	98526.3	cDNA FLJ55529, highly similar to Heat shock 70 kDa protein 4L	3	194.17
B4DGP8	B4DGP8_HUMAN	71971.1	cDNA FLJ55574, highly similar to Calnexin	9	1011.02
B4DSU5	B4DSU5_HUMAN	58709.5	cDNA FLJ55583, highly similar to Polypyrimidine tract-binding protein 2	2	504.52
B7Z8Q2	B7Z8Q2_HUMAN	47566.5	cDNA FLJ55606, highly similar to Alpha-2-HS-glycoprotein	3	161.7
B4DU56	B4DU56_HUMAN	73190.9	cDNA FLJ55612, highly similar to Zinc finger protein 595	2	146.56
B4DZJ7	B4DZJ7_HUMAN	118511	cDNA FLJ55629, highly similar to Transcription elongation factor SPT5	13	880.9
B4DYY5	B4DYY5_HUMAN	113662	cDNA FLJ55671, highly similar to Ubiquitin-associated protein 2-like	3	170.25
B4DJQ8	B4DJQ8_HUMAN	50917.5	cDNA FLJ55694, highly similar to Dipeptidyl-peptidase 1 (EC 3.4.14.1)	1	304.4
B4DLZ6	B4DLZ6_HUMAN	102251	cDNA FLJ55723	1	66.02
B4DSD7	B4DSD7_HUMAN	65647.1	cDNA FLJ55863, highly similar to Serine/threonine-protein phosphatase 2A 56 kDa regulatory subunit delta isoform	2	117
B4DJB4	B4DJB4_HUMAN	34939.5	cDNA FLJ55931, highly similar to Isocitrate dehydrogenase	5	476.53
B4DM85	B4DM85_HUMAN	84644.9	cDNA FLJ56002, highly similar to Kinesin-like protein KIF2	5	363.45
B7Z809	B7Z809_HUMAN	111226	cDNA FLJ56016, highly similar to C-1-tetrahydrofolate synthase, cytoplasmic	5	169.7
B4DN86	B4DN86_HUMAN	102439	cDNA FLJ56047, highly similar to A kinase anchor protein 1, mitochondrial	1	58.29
B4DZ80	B4DZ80_HUMAN	61970.9	cDNA FLJ56049, highly similar to Homeobox and leucine zipper protein Homez	1	56.71
B4DJ38	B4DJ38_HUMAN	84684.8	cDNA FLJ56092, highly similar to Pentatricopeptide repeat protein 1	2	275.74
B4DLM8	B4DLM8_HUMAN	96045.4	cDNA FLJ56105, highly similar to Nuclear valosin-containing protein-like	15	2581.23
B7Z4C2	B7Z4C2_HUMAN	43934.2	cDNA FLJ56109, highly similar to Non-POU domain-containing octamer-binding protein	2	119.01
B7Z705	B7Z705_HUMAN	48425.9	cDNA FLJ56160	2	102.18
B4E0N9	B4E0N9_HUMAN	54566.6	cDNA FLJ56193, highly similar to Glutamate dehydrogenase 1, mitochondrial (EC 1.4.1.3)	2	73.07
B7Z904	B7Z904_HUMAN	71623.6	cDNA FLJ56205, highly similar to Thioredoxin reductase 1, cytoplasmic (EC 1.8.1.9)	2	135.56
B4E2H4	B4E2H4_HUMAN	83193.5	cDNA FLJ56206, highly similar to Homo sapiens nuclear protein UKp68 , transcript variant 1, mRNA	5	384.12
B4DZI8	B4DZI8_HUMAN	99838.9	cDNA FLJ56271, highly similar to Coatomer subunit beta	1	63.1
B7Z7L3	B7Z7L3_HUMAN	38543.8	cDNA FLJ56301, highly similar to NADH-cytochrome b5 reductase (EC 1.6.2.2)	13	2004.83
B4DPD5	B4DPD5_HUMAN	35614.6	cDNA FLJ56307, highly similar to Ubiquitin thioesterase protein OTUB1 (EC 3.4.-.-)	6	744.59
B4DX18	B4DX18_HUMAN	39871.9	cDNA FLJ56327, highly similar to 26S proteasome non-ATPase regulatory subunit 8	2	74.44
B7Z6Z4	B7Z6Z4_HUMAN	26975.1	cDNA FLJ56329, highly similar to Myosin light polypeptide 6	4	285.19
B4DP80	B4DP80_HUMAN	33948.4	cDNA FLJ56357, highly similar to Homo sapiens apolipoprotein A-I binding protein (APOA1BP), mRNA	4	200.34
B4DYR6	B4DYR6_HUMAN	86009.4	cDNA FLJ56381, highly similar to Dynamin-1-like protein (EC 3.6.5.5)	2	93.54
B4DI54	B4DI54_HUMAN	77912.4	cDNA FLJ56386, highly similar to Heat shock 70 kDa protein 1L	13	2391.8
B4DG61	B4DG61_HUMAN	62431.5	cDNA FLJ56430, highly similar to Polyhomeotic-like protein 2	3	282.9
B4DIM0	B4DIM0_HUMAN	125970	cDNA FLJ56442, highly similar to ATP-citrate synthase (EC 2.3.3.8)	3	261.3
B4DGF1	B4DGF1_HUMAN	172794	cDNA FLJ56479, highly similar to Eukaryotic translation initiation factor 4 gamma 1	2	77.41
B4DED6	B4DED6_HUMAN	72683.2	cDNA FLJ56545, highly similar to ATP-dependent RNA helicase DDX50 (EC 3.6.1.-)	4	205.12
B4DSS7	B4DSS7_HUMAN	25994	cDNA FLJ56582, highly similar to NKG2D ligand 2	3	121.36
B4DVS0	B4DVS0_HUMAN	24300.5	cDNA FLJ56740, highly similar to Small nuclear ribonucleoprotein-associatedproteins B and B'	2	262.74
B4DY90	B4DY90_HUMAN	52414.2	cDNA FLJ56903, highly similar to Tubulin beta-7 chain	2	184.02
B4DYH0	B4DYH0_HUMAN	198693	cDNA FLJ56975, highly similar to Ran-binding protein 2-like 6	19	1613.92
B4DYI3	B4DYI3_HUMAN	19075.6	cDNA FLJ57061, highly similar to NADH-ubiquinone oxidoreductase 23 kDa subunit, mitochondrial (EC 1.6.5.3)	1	95.04
B4DJG8	B4DJG8_HUMAN	19144.5	cDNA FLJ57117, highly similar to Charged multivesicular body protein 2b	1	73.03
B4DKS8	B4DKS8_HUMAN	37459.9	cDNA FLJ57121, highly similar to Heterogeneous nuclear ribonucleoprotein F	2	231.39
B4E1Q7	B4E1Q7_HUMAN	33096.5	cDNA FLJ57294, highly similar to Lipoamide acyltransferase component of branched-chain alpha-keto acid dehydrogenase complex, mitochondrial (EC 2.3.1.168)	1	75.37
B7Z3L1	B7Z3L1_HUMAN	47758.6	cDNA FLJ57311, highly similar to GPI transamidase component PIG-T	1	81.03
B4E111	B4E111_HUMAN	144381	cDNA FLJ57346, highly similar to Homo sapiens Treacher Collins-Franceschetti syndrome 1 (TCOF1), transcript variant 1, mRNA (Fragment)	3	139.94
B4DMS5	B4DMS5_HUMAN	20379.7	cDNA FLJ57399, highly similar to HIV-1 Rev-binding protein 2	3	235.75
B4DP77	B4DP77_HUMAN	18778.9	cDNA FLJ57413, highly similar to Mitochondrial 28S ribosomal protein S10	1	67.6
B4DS97	B4DS97_HUMAN	15164.7	cDNA FLJ57579, highly similar to Dynactin subunit 5	2	79.99
B4DUI3	B4DUI3_HUMAN	22984.5	cDNA FLJ57599, moderately similar to Eukaryotic translation initiation factor 3 subunit 1	1	52.22
B4DV49	B4DV49_HUMAN	14787.8	cDNA FLJ57607, highly similar to Transcription factor MafF	3	105.52
B4DXK8	B4DXK8_HUMAN	56662.6	cDNA FLJ57656, highly similar to U3 small nucleolar RNA-associated protein 15 homolog	15	1487.97
B4E029	B4E029_HUMAN	72152.6	cDNA FLJ57693, highly similar to POU domain, class 2, transcription factor 1	2	61.68
B4DEH8	B4DEH8_HUMAN	19092.5	cDNA FLJ57714, highly similar to Poly(A)-binding protein 2	1	253.7
B4E1G1	B4E1G1_HUMAN	17078.8	cDNA FLJ57771, highly similar to Derlin-1	2	202.45
B4DWI8	B4DWI8_HUMAN	52660.1	cDNA FLJ57805, highly similar to Homo sapiens paraspeckle component 1 (PSPC1), transcript variant alpha, mRNA	14	1633.02
B4DYV2	B4DYV2_HUMAN	104534	cDNA FLJ57815	16	1287.43
B4E1S3	B4E1S3_HUMAN	25195.8	cDNA FLJ57860, highly similar to Transmembrane protein 109	1	70.16
B4DFG8	B4DFG8_HUMAN	32152.8	cDNA FLJ57916, highly similar to WD repeat domain phosphoinositide-interacting protein 4	0	58.06
B4DHJ4	B4DHJ4_HUMAN	100299	cDNA FLJ57931, highly similar to MORC family CW-type zinc finger 3	1	52.42
B4DM21	B4DM21_HUMAN	55489.7	cDNA FLJ58021, highly similar to Fragile X mental retardation syndrome-related protein 1	1	102.07
B4DNA0	B4DNA0_HUMAN	47805.8	cDNA FLJ58027	2	62.28
B4DR70	B4DR70_HUMAN	45013.2	cDNA FLJ58049, highly similar to RNA-binding protein FUS	4	208.18
B4DLG2	B4DLG2_HUMAN	83177.4	cDNA FLJ58196, highly similar to Zinc finger CCCH domain-containing protein 11A	12	797.35
B4DM78	B4DM78_HUMAN	63279.7	cDNA FLJ58199, highly similar to Fragile X mental retardation syndrome-related protein 1	4	239.07
B4DQT7	B4DQT7_HUMAN	37799.9	cDNA FLJ58272, highly similar to Zinc finger protein 207	1	61.23
B4DDT7	B4DDT7_HUMAN	34233.3	cDNA FLJ58311, highly similar to 5'-AMP-activated protein kinase subunit gamma-1	4	166.74
B4DJ74	B4DJ74_HUMAN	65636	cDNA FLJ58398, highly similar to A-kinase anchor protein 8	1	312.19
B4DRA0	B4DRA0_HUMAN	56718.1	cDNA FLJ58459, highly similar to RNA-binding region-containing protein 2	8	434.21
B4DMA7	B4DMA7_HUMAN	85996.9	cDNA FLJ58514, highly similar to Cadherin-11	1	111.38
B4DIH6	B4DIH6_HUMAN	71229.6	cDNA FLJ58573, highly similar to Exonuclease 3'-5' domain-like-containing protein 2	2	98.22
B7Z6K2	B7Z6K2_HUMAN	61471.7	cDNA FLJ58625, highly similar to Polypeptide N-acetylgalactosaminyltransferase 2 (EC 2.4.1.41)	6	235.6
B4E074	B4E074_HUMAN	51210.9	cDNA FLJ58655, highly similar to Notchless homolog 1	5	313.18
B4E2S7	B4E2S7_HUMAN	40186	cDNA FLJ58780, highly similar to Homo sapiens lysosomal-associated membrane protein 2 (LAMP2), transcript variant LAMP2B, mRNA	2	106.11
B4DZF7	B4DZF7_HUMAN	76866.8	cDNA FLJ58818, highly similar to Sad1/unc-84 protein-like 1	9	647.48
B4DJP9	B4DJP9_HUMAN	20219	cDNA FLJ58902, highly similar to FUS-interacting serine-arginine-rich protein1	8	1127.57
B4DR03	B4DR03_HUMAN	25305.9	cDNA FLJ58929	1	52.69
B4DZY9	B4DZY9_HUMAN	32544	cDNA FLJ59103, highly similar to T-complex protein 1 subunit epsilon	2	140.77
B4DV10	B4DV10_HUMAN	22907.5	cDNA FLJ59142, highly similar to Epididymal secretory protein E1	1	78.16
B4DEK2	B4DEK2_HUMAN	19031.4	cDNA FLJ59182, highly similar to Splicing factor, arginine/serine-rich 7	3	802.06
B4DFR2	B4DFR2_HUMAN	13410.9	cDNA FLJ59194, moderately similar to Dynein light chain 2A, cytoplasmic	3	221.08
B4DJQ5	B4DJQ5_HUMAN	61065.6	cDNA FLJ59211, highly similar to Glucosidase 2 subunit beta	4	229.57
B4DV56	B4DV56_HUMAN	59111.7	cDNA FLJ59246, highly similar to Rattus norvegicus SWI/SNF related, matrix associated, actin dependent regulator of chromatin, subfamily d, member 2 (Smarcd2), mRNA	1	102.48
B4DPY2	B4DPY2_HUMAN	93124.1	cDNA FLJ59286, highly similar to Pre-mRNA-processing factor 40 homolog A (Fragment)	13	1416.93
B7Z4B0	B7Z4B0_HUMAN	75707.9	cDNA FLJ59337, highly similar to DCC-interacting protein 13 beta	4	173
B4DQI0	B4DQI0_HUMAN	33542.8	cDNA FLJ59385	2	88.59
B4DRB8	B4DRB8_HUMAN	86793.7	cDNA FLJ59395, highly similar to Homo sapiens sphingomyelin phosphodiesterase 4, neutral membrane, transcript variant 1, mRNA	16	1016.12
B4DDI9	B4DDI9_HUMAN	53528	cDNA FLJ59458, highly similar to NADPH:adrenodoxin oxidoreductase, mitochondrial (EC 1.18.1.2)	3	89.6
B4DZF2	B4DZF2_HUMAN	110817	cDNA FLJ59571, highly similar to Eukaryotic translation initiation factor 4gamma 2	2	77.06
B4DZ53	B4DZ53_HUMAN	96752.2	cDNA FLJ59643, highly similar to Neutral alpha-glucosidase AB	1	74.2
B4DTA9	B4DTA9_HUMAN	48628	cDNA FLJ59753	2	79.67
B4DUK7	B4DUK7_HUMAN	23195.6	cDNA FLJ59991, highly similar to Elongation factor 1-gamma	1	61.91
B4E368	B4E368_HUMAN	24582.9	cDNA FLJ60058, highly similar to Myosin light chain 1, slow-twitch muscle A isoform	2	62.22
B7Z3V1	B7Z3V1_HUMAN	113791	cDNA FLJ60077, highly similar to Sodium/potassium-transporting ATPase alpha-1 chain (EC 3.6.3.9) (Fragment)	2	110.13
B4DLN1	B4DLN1_HUMAN	48581.9	cDNA FLJ60124, highly similar to Mitochondrial dicarboxylate carrier	2	154.1
B4DTA2	B4DTA2_HUMAN	30366.7	cDNA FLJ60148, highly similar to Homo sapiens heterogeneous nuclear ribonucleoprotein D-like (HNRPDL), transcript variant 2, mRNA	16	3438.53
B4DVT8	B4DVT8_HUMAN	46325.8	cDNA FLJ60173, highly similar to Zinc-finger protein ZPR1	1	63.53
B4DXG6	B4DXG6_HUMAN	48183.7	cDNA FLJ60191, highly similar to Pyruvate dehydrogenase (lipoamide) kinase isozyme 3 (EC 2.7.11.2)	4	133.9
B4DY34	B4DY34_HUMAN	66791.2	cDNA FLJ60194, highly similar to WW domain-binding protein 11	10	642.9
B4E324	B4E324_HUMAN	54748.2	cDNA FLJ60397, highly similar to Lysosomal protective protein (EC 3.4.16.5)	4	215.17
B4DE59	B4DE59_HUMAN	62862	cDNA FLJ60424, highly similar to Junction plakoglobin	1	65.43
B4DF70	B4DF70_HUMAN	20208.7	cDNA FLJ60461, highly similar to Peroxiredoxin-2 (EC 1.11.1.15)	7	1105.9
B4DIK2	B4DIK2_HUMAN	158852	cDNA FLJ60565, highly similar to Nuclear pore complex protein Nup153	3	178.85
B4DK82	B4DK82_HUMAN	34504.7	cDNA FLJ60622, highly similar to Delta(14)-sterol reductase (EC 1.3.1.70)	2	112
B4DN34	B4DN34_HUMAN	21849.6	cDNA FLJ60720, highly similar to Homo sapiens mitochondrial ribosomal protein L48 (MRPL48), transcript variant 1, mRNA	6	602.05
B4DNM0	B4DNM0_HUMAN	72854.2	cDNA FLJ60738, highly similar to RNA polymerase-associated protein LEO1	7	532.6
B4DRV5	B4DRV5_HUMAN	37360.7	cDNA FLJ60840, highly similar to Nucleoporin p54	2	89.44
B4DRY4	B4DRY4_HUMAN	22766.4	cDNA FLJ60842, highly similar to Glutathione S-transferase Mu 2 (EC 2.5.1.18)	2	71.8
B4DYL9	B4DYL9_HUMAN	151135	cDNA FLJ60970, highly similar to Pogo transposable element with ZNF domain	4	258.05
B4E0X8	B4E0X8_HUMAN	66361.9	cDNA FLJ61021, highly similar to Far upstream element-binding protein 1	15	1207.17
B7Z5Z2	B7Z5Z2_HUMAN	24408.2	cDNA FLJ61162, highly similar to Ras-related protein R-Ras2	4	814.66
B4E2Z8	B4E2Z8_HUMAN	44099.7	cDNA FLJ61206, highly similar to Homo sapiens multiple substrate lipid kinase (MULK), mRNA	10	424.27
B4DJ30	B4DJ30_HUMAN	113539	cDNA FLJ61290, highly similar to Neutral alpha-glucosidase AB	8	266.58
B4DN88	B4DN88_HUMAN	46167.7	cDNA FLJ61322, highly similar to RNA-binding motif,single-stranded-interacting protein 1	3	140.68
B4DRJ2	B4DRJ2_HUMAN	59310	cDNA FLJ61353, highly similar to Apoptosis inhibitor 5	15	1113.09
B7Z5S9	B7Z5S9_HUMAN	103962	cDNA FLJ61359, highly similar to Adapter-relatedprotein complex 2 alpha- 2 subunit	8	433.21
B4DSC1	B4DSC1_HUMAN	46560	cDNA FLJ61369, highly similar to Pre-B-cell leukemia transcription factor 1	2	119.72
B4DTK7	B4DTK7_HUMAN	109141	cDNA FLJ61387, highly similar to Homo sapiens conserved nuclear protein NHN1 (NHN1), mRNA	14	1389.19
B7Z592	B7Z592_HUMAN	45262.2	cDNA FLJ61635, highly similar to Homo sapiens likely ortholog of mouse immediate early response, erythropoietin 4 (LEREPO4), mRNA	4	545
B4E1N4	B4E1N4_HUMAN	70096.3	cDNA FLJ61695, highly similar to Glioma tumor suppressor candidate region gene 2 protein	3	232.78
A8K548	A8K548_HUMAN	120821	cDNA FLJ75008, highly similar to Homo sapiens proline-, glutamic acid-, leucine-rich protein 1 (PELP1), mRNA	20	2161.67
A8K129	A8K129_HUMAN	80546.6	cDNA FLJ75032, highly similar to Homo sapiens unc-84 homolog B (C. elegans) (UNC84B), mRNA	1	117.28
A8KAN5	A8KAN5_HUMAN	60910.3	cDNA FLJ75097, highly similar to Homo sapiens upstream binding protein 1 (LBP-1a) (UBP1), mRNA	8	632.62
A8K3Q7	A8K3Q7_HUMAN	76139.7	cDNA FLJ75116, highly similar to Homo sapiens annexin A6, transcript variant 1, mRNA	5	125.82
A8K1M2	A8K1M2_HUMAN	16958.8	cDNA FLJ75174, highly similar to Homo sapiens calmodulin 1 (phosphorylase kinase, delta), mRNA	2	107.92
A8K8X0	A8K8X0_HUMAN	113035	cDNA FLJ75187, highly similar to Homo sapiens nap1 P120	3	87.08
A8K079	A8K079_HUMAN	52637.8	cDNA FLJ75240, highly similar to Homo sapiens methyl CpG binding protein 2 (MECP2) mRNA	1	86.62
A8K781	A8K781_HUMAN	47577.6	cDNA FLJ75299, highly similar to Xenopus laevis proteasome (prosome, macropain) 26S subunit, ATPase 3, mRNA	5	264.45
A8K245	A8K245_HUMAN	45759.6	cDNA FLJ75441, highly similar to Homo sapiens vaccinia related kinase 1 (VRK1), mRNA	4	539.64
A8K666	A8K666_HUMAN	66628.8	cDNA FLJ75460, highly similar to Homo sapiens phenylalanine-tRNA synthetase-like, beta subunit, mRNA	2	107.54
A8K3Z3	A8K3Z3_HUMAN	44926.8	cDNA FLJ75514, highly similar to S.scrofa putative 26S protease subunit	1	240.36
A8K4Z4	A8K4Z4_HUMAN	34388.9	cDNA FLJ75549, highly similar to Homo sapiens ribosomal protein, large, P0 (RPLP0), transcript variant 1, mRNA	11	1564.8
A8K066	A8K066_HUMAN	48491.1	cDNA FLJ75563, highly similar to Homo sapiens cyclin B1 (CCNB1), mRNA	3	133.75
A8K2F4	A8K2F4_HUMAN	87001.4	cDNA FLJ75620	2	120.86
A8K646	A8K646_HUMAN	23870.9	cDNA FLJ75699, highly similar to Homo sapiens osteoclast stimulating factor 1 (OSTF1), mRNA	1	107.6
A8K651	A8K651_HUMAN	31759.7	cDNA FLJ75700, highly similar to Homo sapiens complement component 1, q subcomponent binding protein (C1QBP), nuclear gene encoding mitochondrial protein, mRNA	7	2325.07
A8K7G2	A8K7G2_HUMAN	48824.9	cDNA FLJ75762, highly similar to Homo sapiens protease, serine, 25 (PRSS25), nuclear gene encodingmitochondrial protein, transcript variant 1, mRNA	1	260.68
A8K818	A8K818_HUMAN	55209.4	cDNA FLJ75784, highly similar to Homo sapiens CD3E antigen, epsilon polypeptide associated protein (CD3EAP), mRNA	4	579.58
A8K9R1	A8K9R1_HUMAN	19618	cDNA FLJ75826, highly similar to Homo sapiens ubiquitin-fold modifier conjugating enzyme 1 (UFC1), mRNA	2	68.39
A8K0B1	A8K0B1_HUMAN	18791.8	cDNA FLJ75949, highly similar to Homo sapiens sorting nexin 3 (SNX3), transcript variant 1, mRNA	5	361.75
A8K6V7	A8K6V7_HUMAN	50842.1	cDNA FLJ76053, highly similar to Homo sapiens Ras-GTPase activating protein SH3 domain-binding protein 2 (G3BP2), transcript variant 3, mRNA	6	518.01
A8K9U6	A8K9U6_HUMAN	103160	cDNA FLJ76121, highly similar to Homo sapiens zinc finger CCCH-type, antiviral 1 (ZC3HAV1), transcript variant 1, mRNA	2	59.2
A8K146	A8K146_HUMAN	106613	cDNA FLJ76216, highly similar to Homo sapiens xeroderma pigmentosum, complementation group C (XPC), mRNA	3	208.93
A8K6W2	A8K6W2_HUMAN	91947.4	cDNA FLJ76317, highly similar to Homo sapiens epidermal growth factor receptor pathway substrate 8 (EPS8), mRNA	1	64.14
A8K510	A8K510_HUMAN	17688.2	cDNA FLJ76397, highly similar to Homo sapiens basic transcription factor 3 (BTF3), mRNA	7	314.71
A8K0X1	A8K0X1_HUMAN	65637.5	cDNA FLJ76646, highly similar to Homo sapiens caldesmon 1 (CALD1), transcript variant 3, mRNA	7	497.13
A8K329	A8K329_HUMAN	103148	cDNA FLJ76656, highly similar to Homo sapiens scaffold attachment factor B (SAFB), mRNA	26	3005.91
A8K525	A8K525_HUMAN	54367.4	cDNA FLJ76817, highly similar to Homo sapiens non-POU domain containing, octamer-binding (NONO), mRNA	31	8659.99
A8K607	A8K607_HUMAN	125216	cDNA FLJ76855, highly similar to Homo sapiens exportin 7 (XPO7), mRNA	3	153.37
A8K644	A8K644_HUMAN	56789.4	cDNA FLJ76859, highly similar to Homo sapiens splicing factor, arginine/serine-rich 4 (SFRS4), mRNA	6	252.74
A8K6A7	A8K6A7_HUMAN	114405	cDNA FLJ76867, highly similar to Homo sapiens mannosidase, alpha, class 2B, member 1 (MAN2B1), mRNA	2	98.21
A8K6G9	A8K6G9_HUMAN	141242	cDNA FLJ76871, highly similar to Homo sapiens DEAH (Asp-Glu-Ala-His) box polypeptide 38 (DHX38), mRNA	4	201.16
A8K6J9	A8K6J9_HUMAN	140152	cDNA FLJ76879, highly similar to Homo sapiens DEAH (Asp-Glu-Ala-His) box polypeptide 8 (DHX8), mRNA	8	415.06
A8K7G8	A8K7G8_HUMAN	59318.7	cDNA FLJ76915, highly similar to Homo sapiens CDC-like kinase 3 (CLK3), transcript variant phclk3, mRNA	6	354.23
A8K8K1	A8K8K1_HUMAN	39808.6	cDNA FLJ76936, highly similar to Homo sapiens RNA terminal phosphate cyclase domain 1 (RTCD1), mRNA	3	174.85
A8K4W3	A8K4W3_HUMAN	23704.5	cDNA FLJ77116, highly similar to Homo sapiens clathrin, light polypeptide (Lca) (CLTA), transcript variant nonbrain, mRNA	4	417.25
A8K5R6	A8K5R6_HUMAN	28704.6	cDNA FLJ77138, highly similar to Homo sapiens golgi SNAP receptor complex member 1 (GOSR1), transcript variant 1, mRNA	3	271.55
A4D2P0	A4D2P0_HUMAN	23851.5	cDNA FLJ77333, highly similar to Homo sapiens ras-related C3 botulinum toxin substrate 1 (rho family, small GTP binding protein Rac1) (RAC1), transcript variant Rac1b, mRNA	7	1185.84
A8K6D6	A8K6D6_HUMAN	61125.2	cDNA FLJ77415, highly similar to Homo sapiens chromodomain protein, Y-like (CDYL), transcript variant 2, mRNA	3	94.75
A8K4C6	A8K4C6_HUMAN	53648.9	cDNA FLJ77418, highly similar to Homo sapiens nuclear respiratory factor-1 (NRF-1) mRNA	3	191.04
A8K946	A8K946_HUMAN	58398.1	cDNA FLJ77439, highly similar to Homo sapiens hCMT1b mRNA (guanine-7-)methyltransferase	3	307.5
A8K6R5	A8K6R5_HUMAN	98275.3	cDNA FLJ77568	13	1025.14
A8K9A1	A8K9A1_HUMAN	68437.9	cDNA FLJ77639	2	74.79
A8K650	A8K650_HUMAN	17938	cDNA FLJ77673, highly similar to Homo sapiens dUTP pyrophosphatase (DUT), mRNA	6	860.67
A8K6F7	A8K6F7_HUMAN	102865	cDNA FLJ77677	3	119.94
A8K6M8	A8K6M8_HUMAN	98937	cDNA FLJ77708, highly similar to Homo sapiens coatomer protein complex, subunit gamma (COPG), mRNA	4	228.02
A8K8U1	A8K8U1_HUMAN	137941	cDNA FLJ77762, highly similar to Homo sapiens cullin-associated and neddylation-dissociated 1 (CAND1), mRNA	6	449.75
A8K337	A8K337_HUMAN	29215.5	cDNA FLJ77862, highly similar to Homo sapiens catechol-O-methyltransferase domain containing 1 (COMTD1), mRNA	4	239
A8K7V1	A8K7V1_HUMAN	59138.3	cDNA FLJ78053, highly similar to Homo sapiens splicing factor 3a, subunit 3, 60kDa (SF3A3), mRNA	20	2047.21
A8K024	A8K024_HUMAN	91324.6	cDNA FLJ78091, highly similar to Homo sapiens ubiquitin-like, containing PHD and RING finger domains, 1 (UHRF1), mRNA	4	415.93
A8K0H3	A8K0H3_HUMAN	17826.1	cDNA FLJ78093, highly similar to Homo sapiens ribosomal protein L29 (RPL29), mRNA	1	208.96
A8K4K1	A8K4K1_HUMAN	45822.8	cDNA FLJ78216, highly similar to Homo sapiens lysosomal neuraminidase, mRNA	2	333.64
A8K0P8	A8K0P8_HUMAN	87344.8	cDNA FLJ78223	13	913.7
A8K7F6	A8K7F6_HUMAN	46320.7	cDNA FLJ78244, highly similar to Homo sapiens eukaryotic translation initiation factor 4A, isoform 1 (EIF4A1), mRNA	18	2339.85
A8K984	A8K984_HUMAN	136025	cDNA FLJ78259	3	106.73
A8K7D9	A8K7D9_HUMAN	58140.1	cDNA FLJ78270, highly similar to Homo sapiens karyopherin alpha 2 (RAG cohort 1, importin alpha 1)(KPNA2), mRNA	23	4074.23
A8KAI0	A8KAI0_HUMAN	42814.2	cDNA FLJ78304, highly similar to Homo sapiens speckle-type POZ protein (SPOP), transcript variant 2, mRNA	2	85.86
A8K2X8	A8K2X8_HUMAN	60148	cDNA FLJ78433, highly similar to Homo sapiens chaperonin containing TCP1, subunit 5 (epsilon) (CCT5), mRNA	4	249.52
A8K916	A8K916_HUMAN	106547	cDNA FLJ78481, highly similar to Homo sapiens adaptor-related protein complex 2, beta 1 subunit, mRNA	7	453.47
A8K6X3	A8K6X3_HUMAN	117912	cDNA FLJ78679, highly similar to Homo sapiens DEAD (Asp-Glu-Ala-Asp) box polypeptide 46 (DDX46), mRNA	6	452.47
A8K2T9	A8K2T9_HUMAN	116927	cDNA FLJ78705, highly similar to Homo sapiens oral-facial-digital syndrome 1 (OFD1), mRNA	1	70.77
B3KQA0	B3KQA0_HUMAN	14598.3	cDNA FLJ90015 fis, clone HEMBA1000634, highly similar to Homo sapiens Mof4 family associated protein 1 (MRFAP1), mRNA	2	632.77
Q8NCL6	Q8NCL6_HUMAN	54216.7	cDNA FLJ90170 fis, clone MAMMA1000370, highly similar to Ig alpha-1 chain C region	2	77.12
Q8NCK5	Q8NCK5_HUMAN	49714.3	cDNA FLJ90195 fis, clone MAMMA1001310	5	709.73
Q8NCF7	Q8NCF7_HUMAN	40362.8	cDNA FLJ90278 fis, clone NT2RP1000325, highly similar to Phosphate carrier protein, mitochondrialprecursor	11	1541.93
B3KQF5	B3KQF5_HUMAN	37109.6	cDNA FLJ90381 fis, clone NT2RP2005035, highly similar to Calumenin	4	124.27
B3KQJ0	B3KQJ0_HUMAN	34402.2	cDNA FLJ90530 fis, clone NT2RP4002187, highly similar to Homo sapiens hydroxysteroid (17-beta) dehydrogenase 12 (HSD17B12), mRNA	2	183.04
B3KQK4	B3KQK4_HUMAN	37961.9	cDNA FLJ90619 fis, clone PLACE1002374, highly similar to Cathepsin L (EC 3.4.22.15)	0	113.47
B3KQR6	B3KQR6_HUMAN	61298.2	cDNA PSEC0090 fis, clone PLACE1001300, highly similar to Heparanase (EC 3.2.-.-)	2	264.73
B3KQT9	B3KQT9_HUMAN	54467.6	cDNA PSEC0175 fis, clone OVARC1000169, highly similar to Protein disulfide-isomerase A3 (EC 5.3.4.1)	17	1378.88
B3KQU6	B3KQU6_HUMAN	29541.2	cDNA PSEC0207 fis, clone HEMBA1002981, highly similar to Homo sapiens nurim (nuclear envelope membrane protein) (NRM), mRNA	9	860.87
B7Z9Q2	B7Z9Q2_HUMAN	36556.4	cDNA, FLJ78916, highly similar to Mothers against decapentaplegic homolog 3 (SMAD3)	1	53.94
B7Z9U6	B7Z9U6_HUMAN	52731.1	cDNA, FLJ78960, highly similar to Radixin	5	546.79
B7ZB83	B7ZB83_HUMAN	44280.5	cDNA, FLJ79447, highly similar to Nucleosome assembly protein 1-like 4	4	190.43
B2R4A2	B2R4A2_HUMAN	13523	cDNA, FLJ92016, highly similar to Homo sapiens ubiquinol-cytochrome c reductase binding protein (UQCRB), mRNA	11	1484.65
B2R4M6	B2R4M6_HUMAN	13258.6	cDNA, FLJ92148, highly similar to Homo sapiens S100 calcium binding protein A9 (calgranulin B) (S100A9), mRNA	2	66.16
B2R506	B2R506_HUMAN	12611.5	cDNA, FLJ92290, highly similar to Homo sapiens general transcription factor IIA, 2 (12kD subunit) (GTF2A2), mRNA	1	89.05
B2R5C5	B2R5C5_HUMAN	17995	cDNA, FLJ92418, highly similar to Homo sapiens zinc finger, HIT domain containing 1 (ZNHIT1), mRNA	4	506.25
B2R5H0	B2R5H0_HUMAN	11773.9	cDNA, FLJ92471, highly similar to Homo sapiens S100 calcium binding protein A11 (calgizzarin) (S100A11), mRNA	2	70.81
B2R5I8	B2R5I8_HUMAN	25168.8	cDNA, FLJ92490, highly similar to Homo sapiens RAB32, member RAS oncogene family (RAB32), mRNA	2	109.99
B2R5U1	B2R5U1_HUMAN	100294	cDNA, FLJ92620, highly similar to Homo sapiens staphylococcal nuclease domain containing 1 (SND1),mRNA	13	837.94
B2R5V9	B2R5V9_HUMAN	141919	cDNA, FLJ92652, highly similar to Homo sapiens high density lipoprotein binding protein (vigilin)(HDLBP), mRNA	9	405.48
B2R673	B2R673_HUMAN	54183.8	cDNA, FLJ92818, highly similar to Homo sapiens pyruvate dehydrogenase complex, component X (PDHX), mRNA	2	91.03
B2R6J3	B2R6J3_HUMAN	27682.1	cDNA, FLJ92974, highly similar to Homo sapiens methylmalonic aciduria (cobalamin deficiency) type B(MMAB), mRNA	1	138.87
B2R6K4	B2R6K4_HUMAN	38075.3	cDNA, FLJ92996, highly similar to Homo sapiens guanine nucleotide binding protein (G protein), beta polypeptide 1 (GNB1), mRNA	16	1680.66
B2R6U8	B2R6U8_HUMAN	26255.7	cDNA, FLJ93125, highly similar to Homo sapiens cleavage and polyadenylation specific factor 5, 25 kDa(CPSF5), mRNA	12	1769.48
B2R718	B2R718_HUMAN	92823.9	cDNA, FLJ93236, highly similar to Homo sapiens nuclear cap binding protein subunit 1, 80kDa (NCBP1),mRNA	14	1284.18
B2R739	B2R739_HUMAN	33559.9	cDNA, FLJ93269, highly similar to Homo sapiens mitochondrial ribosomal protein L15 (MRPL15), nuclear gene encoding mitochondrial protein, mRNA	2	83.26
B2R761	B2R761_HUMAN	59667.9	cDNA, FLJ93299, highly similar to Homo sapiens sterol carrier protein 2 (SCP2), mRNA	2	71.91
B2R7I0	B2R7I0_HUMAN	34343.8	cDNA, FLJ93451, highly similar to Homo sapiens thioredoxin domain containing 14 (TXNDC14), mRNA	2	104.67
B2R7I1	B2R7I1_HUMAN	45029.1	cDNA, FLJ93452, highly similar to Homo sapiens nucleoporin like 2 (NUPL2), mRNA	5	138.23
B2R7M1	B2R7M1_HUMAN	40747.3	cDNA, FLJ93507, highly similar to Homo sapiens ATPase, H+ transporting, lysosomal 38kDa, V0 subunit d isoform 1 (ATP6V0D1), mRNA	4	367.44
B2R7M3	B2R7M3_HUMAN	35767.5	cDNA, FLJ93510, highly similar to Homo sapiens JTV1 gene (JTV1), mRNA	2	66.03
B2R7T8	B2R7T8_HUMAN	30979.5	cDNA, FLJ93598, highly similar to Homo sapiens capping protein (actin filament) muscle Z-line, beta (CAPZB), mRNA	16	2224.2
B2R7V4	B2R7V4_HUMAN	59096.7	cDNA, FLJ93619, highly similar to Homo sapiens PRP4 pre-mRNA processing factor 4 homolog (yeast) (PRPF4), mRNA	16	1408.65
B2R841	B2R841_HUMAN	68962.9	cDNA, FLJ93730, highly similar to Homo sapiens polo-like kinase (Drosophila) (PLK), mRNA	7	479.21
B2R858	B2R858_HUMAN	53581.9	cDNA, FLJ93750, Homo sapiens DEAD (Asp-Glu-Ala-Asp) box polypeptide 6 (DDX6), mRNA	8	537.34
B2R8G6	B2R8G6_HUMAN	38870.2	cDNA, FLJ93891, Homo sapiens FK506 binding protein 8, 38kDa (FKBP8), mRNA	6	825.82
B2R8N1	B2R8N1_HUMAN	23240	cDNA, FLJ93976, highly similar to Homo sapiens COP9 homolog (COP9), mRNA	3	696.34
B2R8W4	B2R8W4_HUMAN	47303.8	cDNA, FLJ94092	1	49.67
B2R911	B2R911_HUMAN	41381	cDNA, FLJ94157, highly similar to Homo sapiens melanoma antigen, family E, 1, cancer/testis specific (MAGEE1), mRNA	1	64.81
B2R959	B2R959_HUMAN	60838.4	cDNA, FLJ94229, highly similar to Homo sapiens heterogeneous nuclear ribonucleoprotein L (HNRPL),mRNA	18	2013.23
B2R984	B2R984_HUMAN	21880	cDNA, FLJ94268, highly similar to Homo sapiens histone 1, H1e (HIST1H1E), mRNA	7	1474.99
B2R9A0	B2R9A0_HUMAN	33936.5	cDNA, FLJ94294, highly similar to Homo sapiens cyclin-dependent kinase 4 (CDK4), mRNA	2	83.88
B2R9J4	B2R9J4_HUMAN	17786.1	cDNA, FLJ94423, highly similar to Homo sapiens mitochondrial ribosomal protein L23 (MRPL23), nuclear gene encoding mitochondrial protein, mRNA	4	614.45
B2R9K5	B2R9K5_HUMAN	29925.9	cDNA, FLJ94435	2	88.42
B2R9K8	B2R9K8_HUMAN	58385.8	cDNA, FLJ94440, highly similar to Homo sapiens chaperonin containing TCP1, subunit 6A (zeta 1)(CCT6A), mRNA	6	233.52
B2R9L6	B2R9L6_HUMAN	43119.3	cDNA, FLJ94450, highly similar to Homo sapiens cyclin-dependent kinase 9 (CDC2-related kinase) (CDK9), mRNA	2	99.43
B2RA70	B2RA70_HUMAN	61305.7	cDNA, FLJ94729, highly similar to Homo sapiens v-yes-1 Yamaguchi sarcoma viral oncogene homolog 1(YES1), mRNA	7	697.25
B2RA72	B2RA72_HUMAN	21820.1	cDNA, FLJ94734, Homo sapiens CHMP1.5 protein (CHMP1.5), mRNA	1	63.99
B2RA86	B2RA86_HUMAN	54672.3	cDNA, FLJ94762, highly similar to Homo sapiens CUG triplet repeat, RNA binding protein 2 (CUGBP2),mRNA	7	414.12
B2RAH5	B2RAH5_HUMAN	115658	cDNA, FLJ94919, highly similar to Homo sapiens protein phosphatase 1, regulatory (inhibitor) subunit 12A (PPP1R12A), mRNA	16	1206.3
B2RAM6	B2RAM6_HUMAN	120084	cDNA, FLJ95005, highly similar to Homo sapiens kinesin family member 11 (KIF11), mRNA	1	75.37
B2RAQ9	B2RAQ9_HUMAN	30254.4	cDNA, FLJ95059, highly similar to Homo sapiens proteasome (prosome, macropain) subunit, beta type, 7 (PSMB7), mRNA	1	99.92
B2RAR5	B2RAR5_HUMAN	107644	cDNA, FLJ95067	34	3089.11
B2RE77	B2RE77_HUMAN	28151.2	cDNA, FLJ95224, Homo sapiens proline rich 3 (PRR3), mRNA	1	54.17
B2RBA9	B2RBA9_HUMAN	91325.7	cDNA, FLJ95411, highly similar to Homo sapiens ubiquitin-like, containing PHD and RING finger domains, 1 (UHRF1), mRNA	14	897.03
B2RBM8	B2RBM8_HUMAN	124850	cDNA, FLJ95596, highly similar to Homo sapiens activity-dependent neuroprotector (ADNP), mRNA	17	1092.09
B2RBP6	B2RBP6_HUMAN	76332.8	cDNA, FLJ95622, highly similar to Homo sapiens THO complex 1 (THOC1), mRNA	17	2078.93
B2RCF7	B2RCF7_HUMAN	51500.5	cDNA, FLJ96046, Homo sapiens BTG3 associated nuclear protein (BANP), transcriptvariant 2, mRNA	2	99.84
B2RCM2	B2RCM2_HUMAN	135550	cDNA, FLJ96156, highly similar to Homo sapiens leucyl-tRNA synthetase (LARS), mRNA	4	292.02
B2RCX0	B2RCX0_HUMAN	32114.7	cDNA, FLJ96345, Homo sapiens SET translocation (myeloid leukemia-associated) (SET),mRNA	6	450.56
B2RD51	B2RD51_HUMAN	33658.8	cDNA, FLJ96455, highly similar to Homo sapiens Down syndrome critical region gene 2 (DSCR2), mRNA	3	123.35
B2RD81	B2RD81_HUMAN	24372.8	cDNA, FLJ96497	2	86.79
B2RDE1	B2RDE1_HUMAN	29227.8	cDNA, FLJ96568, highly similar to Homo sapiens tropomyosin 3 (TPM3), mRNA	6	361.91
B2RDE8	B2RDE8_HUMAN	26902.9	cDNA, FLJ96580, highly similar to Homo sapiens hepatoma-derived growth factor (high-mobility group protein 1-like) (HDGF), mRNA	2	177.22
B2RDN3	B2RDN3_HUMAN	29264	cDNA, FLJ96692, highly similar to Homo sapiens nucleotide binding protein 2 (MinD homolog, E. coli) (NUBP2), mRNA	1	56.05
B2RDN9	B2RDN9_HUMAN	70026.2	cDNA, FLJ96699, highly similar to Homo sapiens thyroid autoantigen 70kDa (Ku antigen) (G22P1), mRNA	1	46.28
B2RDQ3	B2RDQ3_HUMAN	33775.6	cDNA, FLJ96718, highly similar to Homo sapiens splicing factor, arginine/serine-rich 10 (transformer 2 homolog, Drosophila) (SFRS10), mRNA	5	751.99
B2RDU2	B2RDU2_HUMAN	30161.3	cDNA, FLJ96768, Homo sapiens non-SMC (structural maintenance of chromosomes)element 1 protein (NSE1), mRNA	6	337.26
B2RDW0	B2RDW0_HUMAN	16766.8	cDNA, FLJ96792, highly similar to Homo sapiens calmodulin 2 (phosphorylase kinase, delta) (CALM2), mRNA	13	4679.6
B2RDX5	B2RDX5_HUMAN	82973.6	cDNA, FLJ96812, highly similar to Homo sapiens threonyl-tRNA synthetase (TARS), mRNA	11	672.36
B2RE36	B2RE36_HUMAN	29501.2	cDNA, FLJ96903	4	181.31
P06493	CDC2_HUMAN	34130.9	Cell division control protein 2 homolog	9	968.16
B7ZVY7	B7ZVY7_HUMAN	91418.6	Cell division cycle 2-like 1 (PITSLRE proteins)	6	338.12
Q99459	CDC5L_HUMAN	92421.8	Cell division cycle 5-like protein	20	1949.99
Q8IX12	CCAR1_HUMAN	133423	Cell division cycle and apoptosis regulator protein 1	14	1141.2
O75794	CD123_HUMAN	39566.3	Cell division cycle protein 123 homolog	1	54.52
Q9UJX2	CDC23_HUMAN	69040.1	Cell division cycle protein 23 homolog	2	90.45
P30260	CDC27_HUMAN	92892.7	Cell division cycle protein 27 homolog	3	78.52
Q69YH5	CDCA2_HUMAN	114217	Cell division cycle-associated protein 2	3	196.09
P24941	CDK2_HUMAN	34079.1	Cell division protein kinase 2	4	185.49
Q00535	CDK5_HUMAN	33739.4	Cell division protein kinase 5	2	90.91
P50613	CDK7_HUMAN	39298.6	Cell division protein kinase 7	2	95.89
Q08ES8	Q08ES8_HUMAN	20309.7	Cell growth-inhibiting protein 34	8	927.43
Q9NX58	LYAR_HUMAN	44044	Cell growth-regulating nucleolar protein	7	1681.54
Q4JGY1	Q4JGY1_HUMAN	20112.8	Cellular nucleic acid binding protein beta variant 1	6	929.05
P62633	CNBP_HUMAN	20704	Cellular nucleic acid-binding protein	6	1054.44
B6E4X6	B6E4X6_HUMAN	44296.7	Cellular tumor antigen p53	9	1262.32
P41208	CETN2_HUMAN	19725.9	Centrin-2	5	322.57
O15182	CETN3_HUMAN	19537.9	Centrin-3	3	250.92
P49454	CENPF_HUMAN	370844	Centromere protein F	11	331.03
Q9H3R5	CENPH_HUMAN	28519.9	Centromere protein H	2	370.11
Q9NSP4	CENPM_HUMAN	20009.5	Centromere protein M	4	518.41
Q7L2Z9	CENPQ_HUMAN	30633.2	Centromere protein Q	3	63.06
Q8N2Z9	CENPS_HUMAN	16054	Centromere protein S	4	328.3
Q7Z7K6	CENPV_HUMAN	30383.3	Centromere protein V	8	1062.04
O43159	HUCE1_HUMAN	51424.4	Cerebral protein 1	11	981.63
Q9UFW8	CGBP1_HUMAN	19093.7	CGG triplet repeat-binding protein 1	7	955.04
A1JUI8	A1JUI8_HUMAN	54103.3	Chaperonin subunit 6A (Fragment)	3	179.44
Q9HD42	CHM1A_HUMAN	21746.2	Charged multivesicular body protein 1a	2	164.85
O43633	CHM2A_HUMAN	25087.9	Charged multivesicular body protein 2a	6	807.95
Q9BY43	CHM4A_HUMAN	25082.8	Charged multivesicular body protein 4a	3	288.8
Q9H444	CHM4B_HUMAN	24934.6	Charged multivesicular body protein 4b	5	549.65
Q9NZZ3	CHMP5_HUMAN	24612.4	Charged multivesicular body protein 5	3	227.55
Q96FZ7	CHMP6_HUMAN	23527.3	Charged multivesicular body protein 6	1	57.61
Q53FB0	Q53FB0_HUMAN	27339.9	Chloride intracellular channel 1 variant (Fragment)	4	279.71
Q9Y696	CLIC4_HUMAN	28981.8	Chloride intracellular channel protein 4	5	546.98
Q9NRG0	CHRC1_HUMAN	14758.5	Chromatin accessibility complex protein 1	4	626.07
Q13111	CAF1A_HUMAN	108057	Chromatin assembly factor 1 subunit A	13	873.03
Q13112	CAF1B_HUMAN	61910.4	Chromatin assembly factor 1 subunit B	8	547.8
P83916	CBX1_HUMAN	21518.6	Chromobox protein homolog 1	9	5009.8
Q14781	CBX2_HUMAN	56388.2	Chromobox protein homolog 2	1	82.37
Q13185	CBX3_HUMAN	20969.4	Chromobox protein homolog 3	8	5101
P45973	CBX5_HUMAN	22382.1	Chromobox protein homolog 5	13	1668.65
Q9HC52	CBX8_HUMAN	43483.5	Chromobox protein homolog 8	4	77.33
Q17RZ3	Q17RZ3_HUMAN	197610	Chromodomain helicase DNA binding protein 1	3	158.31
Q86WJ1	CHD1L_HUMAN	101507	Chromodomain-helicase-DNA-binding protein 1-like	4	202.29
Q14839	CHD4_HUMAN	219393	Chromodomain-helicase-DNA-binding protein 4	37	2326.24
Q9P2D1	CHD7_HUMAN	337542	Chromodomain-helicase-DNA-binding protein 7	12	568.91
Q5TBI2	Q5TBI2_HUMAN	28517.5	Chromosome 1 open reading frame 131 (Fragment)	2	69.05
B1AK64	B1AK64_HUMAN	21695.8	Chromosome 1 open reading frame 149	3	564.46
Q5TDF0	Q5TDF0_HUMAN	25341.4	Chromosome 1 open reading frame 57	3	390.43
B3KN83	B3KN83_HUMAN	12490.4	Chromosome 14 open reading frame 46	4	100.4
A8K9B7	A8K9B7_HUMAN	11935.1	Chromosome 9 open reading frame 123	2	108.47
O95239	KIF4A_HUMAN	141390	Chromosome-associated kinesin KIF4A	6	373.09
Q9P2M7	CING_HUMAN	136532	Cingulin	4	194.74
Q567R9	Q567R9_HUMAN	16820	CIP29 protein	1	146.38
Q969X6	CIR1A_HUMAN	77525.6	Cirhin	9	857.48
O95232	CROP_HUMAN	51834.3	Cisplatin resistance-associated overexpressed protein	13	1082.76
O75390	CISY_HUMAN	51907.6	Citrate synthase, mitochondrial	2	105.82
Q1RMC5	Q1RMC5_HUMAN	151531	Claspin homolog (Xenopus laevis)	2	83.66
O60641	AP180_HUMAN	92672.1	Clathrin coat assembly protein AP180	1	65.11
Q00610	CLH1_HUMAN	193260	Clathrin heavy chain 1	44	4077.55
Q53Y37	Q53Y37_HUMAN	23281.2	Clathrin, light polypeptide (Lcb)	2	222.61
Q10570	CPSF1_HUMAN	162036	Cleavage and polyadenylation specificity factor subunit 1	18	1599.53
Q9P2I0	CPSF2_HUMAN	89286	Cleavage and polyadenylation specificity factor subunit 2	16	980.32
Q9UKF6	CPSF3_HUMAN	78120.4	Cleavage and polyadenylation specificity factor subunit 3	6	492.37
O95639	CPSF4_HUMAN	31261	Cleavage and polyadenylation specificity factor subunit 4	10	840.96
Q16630	CPSF6_HUMAN	59344.5	Cleavage and polyadenylation specificity factor subunit 6	9	958.18
Q8N684	CPSF7_HUMAN	52189.3	Cleavage and polyadenylation specificity factor subunit 7	9	995.72
Q05048	CSTF1_HUMAN	49125	Cleavage stimulation factor 50 kDa subunit	6	536.47
P33240	CSTF2_HUMAN	61034.5	Cleavage stimulation factor 64 kDa subunit	12	968.28
Q12996	CSTF3_HUMAN	83324.9	Cleavage stimulation factor 77 kDa subunit	16	1322.51
Q14019	COTL1_HUMAN	16049.1	Coactosin-like protein	3	227.77
P12259	FA5_HUMAN	252654	Coagulation factor V	1	55.7
Q53FU3	Q53FU3_HUMAN	20311.6	Coatomer protein complex, subunit zeta 1 variant (Fragment)	4	475.88
P53621	COPA_HUMAN	139797	Coatomer subunit alpha	6	532.74
P53618	COPB_HUMAN	108214	Coatomer subunit beta	2	87.85
Q96EY8	MMAB_HUMAN	27713.1	Cob(I)yrinic acid a,c-diamide adenosyltransferase, mitochondrial	1	160.09
P23528	COF1_HUMAN	18718.7	Cofilin-1	12	4211.57
Q9Y281	COF2_HUMAN	18838.9	Cofilin-2	9	1128.82
Q8N3U4	STAG2_HUMAN	142433	Cohesin subunit SA-2	33	2692.07
Q8NE86	C109A_HUMAN	40126.9	Coiled-coil domain-containing protein 109A	6	523.17
Q8WUD4	CCD12_HUMAN	19226.3	Coiled-coil domain-containing protein 12	7	1010.07
Q96CT7	CC124_HUMAN	25819.6	Coiled-coil domain-containing protein 124	7	967.27
Q96BQ5	CC127_HUMAN	30986.1	Coiled-coil domain-containing protein 127	7	360.68
Q6PK04	CC137_HUMAN	33268.1	Coiled-coil domain-containing protein 137	1	292.24
Q9Y592	CCD41_HUMAN	82179.9	Coiled-coil domain-containing protein 41	1	36.07
Q96A33	CCD47_HUMAN	56123.4	Coiled-coil domain-containing protein 47	8	608.03
Q9Y2R0	CCD56_HUMAN	11724.1	Coiled-coil domain-containing protein 56	7	1272.44
Q4VC31	CCD58_HUMAN	16837.6	Coiled-coil domain-containing protein 58	1	107.8
Q9Y2S6	CCD72_HUMAN	7061.93	Coiled-coil domain-containing protein 72	3	171.09
Q8N954	CCD75_HUMAN	30951.3	Coiled-coil domain-containing protein 75	1	68.06
Q9H6F5	CCD86_HUMAN	40325.4	Coiled-coil domain-containing protein 86	7	365.36
Q96AQ8	CC90A_HUMAN	40011.2	Coiled-coil domain-containing protein 90A, mitochondrial	3	210.49
Q96BP2	CHCH1_HUMAN	13694.1	Coiled-coil-helix-coiled-coil-helix domain-containing protein 1	2	468.91
Q9Y6H1	CHCH2_HUMAN	15730.8	Coiled-coil-helix-coiled-coil-helix domain-containing protein 2, mitochondrial	4	723.93
Q9NX63	CHCH3_HUMAN	26421.3	Coiled-coil-helix-coiled-coil-helix domain-containing protein 3, mitochondrial	14	2162.86
Q9BRQ6	CHCH6_HUMAN	26669.5	Coiled-coil-helix-coiled-coil-helix domain-containing protein 6	10	1593.75
Q9NYJ1	CHCH8_HUMAN	10355.7	Coiled-coil-helix-coiled-coil-helix domain-containing protein 8	1	127.15
P38432	P80C_HUMAN	63254.2	Coilin	10	1258.13
O75534	CSDE1_HUMAN	89684.2	Cold shock domain-containing protein E1	9	441.19
Q14011	CIRBP_HUMAN	18636.7	Cold-inducible RNA-binding protein	4	1242.16
Q9H0A8	COMD4_HUMAN	22092.4	COMM domain-containing protein 4	2	45.86
Q9P000	COMD9_HUMAN	22033.5	COMM domain-containing protein 9	1	104.45
P02748	CO9_HUMAN	64615.3	Complement component C9	1	65.77
Q9Y375	CIA30_HUMAN	37797.1	Complex I intermediate-associated protein 30, mitochondrial	4	121.03
Q15021	CND1_HUMAN	158495	Condensin complex subunit 1	9	479.83
Q15003	CND2_HUMAN	83309.6	Condensin complex subunit 2	3	131.96
P42695	CNDD3_HUMAN	170950	Condensin-2 complex subunit D3	3	159.08
Q9NZB2	F120A_HUMAN	123008	Constitutive coactivator of PPAR-gamma-like protein 1	6	176.77
Q9UNS2	CSN3_HUMAN	48412.2	COP9 signalosome complex subunit 3	2	301.92
Q53FV3	Q53FV3_HUMAN	46523.8	COP9 signalosome subunit 4 variant (Fragment)	1	57.02
B0QZ18	B0QZ18_HUMAN	60307.1	Copine I	3	230.34
O75131	CPNE3_HUMAN	60947.4	Copine-3	5	215.68
O75367	H2AY_HUMAN	39763.5	Core histone macro-H2A.1	16	5286
Q9P0M6	H2AW_HUMAN	40261.4	Core histone macro-H2A.2	6	711.49
Q13951	PEBB_HUMAN	21722.8	Core-binding factor subunit beta	4	1019.84
Q53G58	Q53G58_HUMAN	53931.3	Coronin, actin binding protein, 1C variant (Fragment)	2	80.49
Q9BR76	COR1B_HUMAN	54884.5	Coronin-1B	5	161.08
A7MAP1	A7MAP1_HUMAN	59708.1	Coronin-1C_i3 protein	15	1260.73
Q53HG7	Q53HG7_HUMAN	61691.6	Cortactin isoform a variant (Fragment)	17	1279.95
P10589	COT1_HUMAN	47095.2	COUP transcription factor 1	5	217.99
P24468	COT2_HUMAN	46454	COUP transcription factor 2	5	291.29
Q7Z7K0	COXAM_HUMAN	12823.4	COX assembly mitochondrial protein homolog	2	393.06
Q6FHJ9	Q6FHJ9_HUMAN	13916	COX5B protein (Fragment)	1	51.51
Q8IY43	Q8IY43_HUMAN	22774.9	CRADD protein	0	61.35
P12277	KCRB_HUMAN	42902.4	Creatine kinase B-type	10	1147.08
Q71SV8	Q71SV8_HUMAN	100442	Crn-related protein kim1	5	189.37
Q9BZJ0	CRNL1_HUMAN	100902	Crooked neck-like protein 1	7	586.57
Q59EK7	Q59EK7_HUMAN	37858.4	CS0DF038YO05 variant (Fragment)	2	586.48
Q05D32	CTSL2_HUMAN	53137.2	CTD small phosphatase-like protein 2	2	117.38
Q13363	CTBP1_HUMAN	47961.7	C-terminal-binding protein 1	10	630.83
P56545	CTBP2_HUMAN	49427.3	C-terminal-binding protein 2	8	500.7
P17812	PYRG1_HUMAN	67332.2	CTP synthase 1	6	729.1
Q9NRF8	PYRG2_HUMAN	66320.1	CTP synthase 2	2	65.26
Q92879	CELF1_HUMAN	52429	CUG-BP- and ETR-3-like factor 1	10	1850.42
B1APK5	B1APK5_HUMAN	104486	Cullin 4B	5	184.48
Q13618	CUL3_HUMAN	89443.7	Cullin-3	1	135.93
P18847	ATF3_HUMAN	20847.8	Cyclic AMP-dependent transcription factor ATF-3	3	131.28
P16220	CREB1_HUMAN	36893.7	Cyclic AMP-responsive element-binding protein 1	1	64.92
O14519	CDKA1_HUMAN	12414.3	Cyclin-dependent kinase 2-associated protein 1	1	89.67
P42771	CD2A1_HUMAN	16579.4	Cyclin-dependent kinase inhibitor 2A, isoforms 1/2/3	4	618.32
P61024	CKS1_HUMAN	9653.94	Cyclin-dependent kinases regulatory subunit 1	1	149.65
P33552	CKS2_HUMAN	9853.98	Cyclin-dependent kinases regulatory subunit 2	1	157.72
O75909	CCNK_HUMAN	64597.8	Cyclin-K	2	140.29
Q9UK58	CCNL1_HUMAN	59996.3	Cyclin-L1	1	523.38
Q8N1B3	FA58A_HUMAN	28578.5	Cyclin-related protein FAM58A	2	136.68
Q8N7R7	CCYL1_HUMAN	41249.7	Cyclin-Y-like protein 1	1	62.74
P04080	CYTB_HUMAN	11189.6	Cystatin-B	3	1181.52
P21291	CSRP1_HUMAN	21409.1	Cysteine and glycine-rich protein 1	5	389.21
Q16527	CSRP2_HUMAN	21852.2	Cysteine and glycine-rich protein 2	8	737.83
O43169	CYB5B_HUMAN	16436	Cytochrome b5 type B	4	618.63
P31930	QCR1_HUMAN	53296.7	Cytochrome b-c1 complex subunit 1, mitochondrial	17	2337.49
P22695	QCR2_HUMAN	48583.9	Cytochrome b-c1 complex subunit 2, mitochondrial	16	2119.75
P07919	QCR6_HUMAN	11017	Cytochrome b-c1 complex subunit 6, mitochondrial	3	763.49
P14927	QCR7_HUMAN	13522	Cytochrome b-c1 complex subunit 7	12	2183.03
O14949	QCR8_HUMAN	9900.12	Cytochrome b-c1 complex subunit 8	6	620.84
Q9UDW1	QCR9_HUMAN	7303.83	Cytochrome b-c1 complex subunit 9	3	422.16
P47985	UCRI_HUMAN	29934.5	Cytochrome b-c1 complex subunit Rieske, mitochondrial	5	1255.76
P0C7P4	UCRIL_HUMAN	31081.2	Cytochrome b-c1 complex subunit Rieske-like protein 1	3	533.41
P99999	CYC_HUMAN	11855.2	Cytochrome c	5	659.06
Q9Y6N1	COX11_HUMAN	31752	Cytochrome c oxidase assembly protein COX11, mitochondrial	6	381.31
Q7KZN9	COX15_HUMAN	46342.6	Cytochrome c oxidase assembly protein COX15 homolog	2	91.35
Q9P0S2	COX16_HUMAN	12285.5	Cytochrome c oxidase assembly protein COX16 homolog, mitochondrial	2	248.15
Q14061	COX17_HUMAN	7252.51	Cytochrome c oxidase copper chaperone	2	248.53
Q0Z7S0	Q0Z7S0_HUMAN	25705.3	Cytochrome c oxidase subunit 2	8	1010.43
P20674	COX5A_HUMAN	16922.8	Cytochrome c oxidase subunit 5A, mitochondrial	10	2960.53
P10606	COX5B_HUMAN	13915	Cytochrome c oxidase subunit 5B, mitochondrial	6	859.04
P14854	CX6B1_HUMAN	10413.8	Cytochrome c oxidase subunit 6B1	8	1461.75
P09669	COX6C_HUMAN	8775.69	Cytochrome c oxidase subunit 6C	9	923.93
O14548	COX7R_HUMAN	12663.5	Cytochrome c oxidase subunit 7A-related protein, mitochondrial	3	452.27
Q6P666	Q6P666_HUMAN	19651.1	Cytochrome c oxidase subunit IV isoform 1	10	1715.88
P08574	CY1_HUMAN	35709.1	Cytochrome c1, heme protein, mitochondrial	4	229.22
P53701	CCHL_HUMAN	30981	Cytochrome c-type heme lyase	2	152.74
Q96F07	CYFP2_HUMAN	150298	Cytoplasmic FMR1-interacting protein 2	2	116.45
B7ZLW6	B7ZLW6_HUMAN	187041	Cytosine-specific methyltransferase	8	584.29
B2RMQ4	B2RMQ4_HUMAN	77408.1	Cytoskeleton associated protein 2	4	201.59
Q07065	CKAP4_HUMAN	66096.8	Cytoskeleton-associated protein 4	22	3248.58
Q14008	CKAP5_HUMAN	227062	Cytoskeleton-associated protein 5	9	345.54
Q69YQ0	CYTSA_HUMAN	124915	Cytospin-A	7	315.56
O43175	SERA_HUMAN	57355.7	D-3-phosphoglycerate dehydrogenase	8	371.93
Q96EP5	DAZP1_HUMAN	43584.1	DAZ-associated protein 1	8	1278.23
Q9BTE7	DCNL5_HUMAN	27832.7	DCN1-like protein 5	4	314.06
Q9H773	DCTP1_HUMAN	18783.4	dCTP pyrophosphatase 1	3	261.22
P30046	DOPD_HUMAN	12817.7	D-dopachrome decarboxylase	6	778.16
Q96HY6	DDRGK_HUMAN	35589.5	DDRGK domain-containing protein 1	1	49.07
B1AHM0	B1AHM0_HUMAN	73138.3	DEAD (Asp-Glu-Ala-Asp) box polypeptide 17	9	877.71
B2RDL0	B2RDL0_HUMAN	80120.6	DEAD (Asp-Glu-Ala-Asp) box polypeptide 21, isoform CRA_c	11	845.79
Q53HB9	Q53HB9_HUMAN	61983.1	DEAD (Asp-Glu-Ala-Asp) box polypeptide 56 variant (Fragment)	8	643.85
Q59F66	Q59F66_HUMAN	81701	DEAD box polypeptide 17 isoform p82 variant (Fragment)	26	2324.28
Q9H4E3	Q9H4E3_HUMAN	50888.8	DEAD box protein	2	225.02
Q8TDR3	Q8TDR3_HUMAN	92960.8	DEAD-box corepressor DP103	2	75.15
B2RB00	B2RB00_HUMAN	115600	DEAH (Asp-Glu-Ala-His) box polypeptide 36, isoform CRA_a	6	280.61
Q86X36	Q86X36_HUMAN	140055	DEAH (Asp-Glu-Ala-His) box polypeptide 8	4	335.16
Q9BTC0	DIDO1_HUMAN	245434	Death-inducer obliterator 1	1	77.05
Q14UF3	Q14UF3_HUMAN	57208.7	Decay-accelerating factor splicing variant 4	6	553.83
Q96N67	DOCK7_HUMAN	244289	Dedicator of cytokinesis protein 7	2	102.62
Q6IAN0	DRS7B_HUMAN	35381.7	Dehydrogenase/reductase SDR family member 7B	7	725.65
O43583	DENR_HUMAN	22477.2	Density-regulated protein	4	627.7
P32321	DCTD_HUMAN	20459	Deoxycytidylate deaminase	1	50.98
Q5QJE6	TDIF2_HUMAN	84817	Deoxynucleotidyltransferase terminal-interacting protein 2	10	984.12
P81605	DCD_HUMAN	11390.9	Dermcidin	2	108.37
Q14126	DSG2_HUMAN	123016	Desmoglein-2	12	959.7
P15924	DESP_HUMAN	334021	Desmoplakin	65	3596.7
P60981	DEST_HUMAN	18949.7	Destrin	8	716.67
Q9Y295	DRG1_HUMAN	40801.9	Developmentally-regulated GTP-binding protein 1	4	350.74
Q502X2	Q502X2_HUMAN	21219.5	Diablo homolog (Drosophila)	4	113.36
B2R5X0	B2R5X0_HUMAN	54713.2	Dihydrolipoyl dehydrogenase	6	428.49
P10515	ODP2_HUMAN	69466.3	Dihydrolipoyllysine-residue acetyltransferase component of pyruvate dehydrogenase complex, mitochondrial	4	524.05
P36957	ODO2_HUMAN	49040.6	Dihydrolipoyllysine-residue succinyltransferase component of 2-oxoglutarate dehydrogenase complex, mitochondrial	4	419.12
Q9UIU0	Q9UIU0_HUMAN	126369	Dihydropyridine receptor alpha 2 subunit	15	841.35
Q8WVM0	TFB1M_HUMAN	39860.1	Dimethyladenosine transferase 1, mitochondrial	2	79.04
A8QI98	A8QI98_HUMAN	110072	DIS3	1	52.93
Q9Y6K1	DNM3A_HUMAN	103390	DNA (cytosine-5)-methyltransferase 3A	7	627.83
Q16531	DDB1_HUMAN	128142	DNA damage-binding protein 1	28	2135.49
Q92466	DDB2_HUMAN	48460.6	DNA damage-binding protein 2	2	73.09
B4DTU4	B4DTU4_HUMAN	98794.9	DNA ligase	1	76.27
B2RBW4	B2RBW4_HUMAN	105028	DNA ligase	2	49.49
Q6NVK3	Q6NVK3_HUMAN	114317	DNA ligase	25	2103.88
Q9NPF5	DMAP1_HUMAN	53130.9	DNA methyltransferase 1-associated protein 1	9	907.36
P43246	MSH2_HUMAN	105418	DNA mismatch repair protein Msh2	7	792.97
P52701	MSH6_HUMAN	154514	DNA mismatch repair protein Msh6	5	221.19
P09884	DPOLA_HUMAN	167575	DNA polymerase alpha catalytic subunit	2	46.44
Q9NRF9	DPOE3_HUMAN	16906.3	DNA polymerase epsilon subunit 3	5	897.35
Q9NR33	DPOE4_HUMAN	12315.3	DNA polymerase epsilon subunit 4	1	121.27
P49643	PRI2_HUMAN	59225.2	DNA primase large subunit	4	233.41
Q92878	RAD50_HUMAN	154823	DNA repair protein RAD50	21	1611.95
Q13426	XRCC4_HUMAN	38548.1	DNA repair protein XRCC4	2	182.19
Q14691	PSF1_HUMAN	23258.7	DNA replication complex GINS protein PSF1	2	135.88
Q9Y248	PSF2_HUMAN	21471	DNA replication complex GINS protein PSF2	4	319.96
Q9BRX5	PSF3_HUMAN	24576.2	DNA replication complex GINS protein PSF3	3	346.56
Q9BRT9	SLD5_HUMAN	26144.3	DNA replication complex GINS protein SLD5	2	213.7
P49736	MCM2_HUMAN	102516	DNA replication licensing factor MCM2	28	2355.77
P33991	MCM4_HUMAN	97067.9	DNA replication licensing factor MCM4	20	1920.48
P33992	MCM5_HUMAN	83031.5	DNA replication licensing factor MCM5	17	1158.26
Q14566	MCM6_HUMAN	93800.6	DNA replication licensing factor MCM6	24	2445.59
P33993	MCM7_HUMAN	81883.8	DNA replication licensing factor MCM7	28	2726.1
P11387	TOP1_HUMAN	91125.1	DNA topoisomerase 1	20	2885.57
P11388	TOP2A_HUMAN	175017	DNA topoisomerase 2-alpha	70	7310.57
Q02880	TOP2B_HUMAN	184122	DNA topoisomerase 2-beta	59	5270.25
P27695	APEX1_HUMAN	35931.3	DNA-(apurinic or apyrimidinic site) lyase	11	975.23
P29372	3MG_HUMAN	33246.9	DNA-3-methyladenine glycosylase	2	133.91
P16989	DBPA_HUMAN	40066	DNA-binding protein A	6	1094.03
P47928	ID4_HUMAN	17067.7	DNA-binding protein inhibitor ID-4	1	46.66
P78527	PRKDC_HUMAN	473749	DNA-dependent protein kinase catalytic subunit	150	14768.8
B7Z823	B7Z823_HUMAN	133849	DNA-directed RNA polymerase	10	846.58
A8MW88	A8MW88_HUMAN	135118	DNA-directed RNA polymerase (Fragment)	25	1501.87
O95602	RPA1_HUMAN	196683	DNA-directed RNA polymerase I subunit RPA1	40	2658.82
Q9P1U0	RPA12_HUMAN	14464.5	DNA-directed RNA polymerase I subunit RPA12	4	489.36
Q3B726	RPA43_HUMAN	37922	DNA-directed RNA polymerase I subunit RPA43	2	312.62
Q9GZS1	RPA49_HUMAN	54441.1	DNA-directed RNA polymerase I subunit RPA49	5	394.89
P24928	RPB1_HUMAN	218438	DNA-directed RNA polymerase II subunit RPB1	31	1944.98
P52435	RPB11_HUMAN	13342.1	DNA-directed RNA polymerase II subunit RPB11-a	8	892.95
P19387	RPB3_HUMAN	31763.9	DNA-directed RNA polymerase II subunit RPB3	8	1400.3
O15514	RPB4_HUMAN	16415.2	DNA-directed RNA polymerase II subunit RPB4	5	886.32
P62487	RPB7_HUMAN	19452.9	DNA-directed RNA polymerase II subunit RPB7	8	1405.6
P36954	RPB9_HUMAN	15026.8	DNA-directed RNA polymerase II subunit RPB9	7	1119.02
Q9Y2Y1	RPC10_HUMAN	12897.9	DNA-directed RNA polymerase III subunit RPC10	1	95.39
O75575	RPC9_HUMAN	16917.7	DNA-directed RNA polymerase III subunit RPC9	1	101.28
Q9Y2S0	RPAC2_HUMAN	15398.5	DNA-directed RNA polymerases I and III subunit RPAC2	8	1637.65
P52434	RPAB3_HUMAN	17189.5	DNA-directed RNA polymerases I, II, and III subunit RPABC3	7	2545.57
P53803	RPAB4_HUMAN	7227.58	DNA-directed RNA polymerases I, II, and III subunit RPABC4	1	58.09
P62875	RPAB5_HUMAN	7868.07	DNA-directed RNA polymerases I, II, and III subunit RPABC5	2	183.27
P31689	DNJA1_HUMAN	45580.7	DnaJ homolog subfamily A member 1	7	468.45
O60884	DNJA2_HUMAN	46343.8	DnaJ homolog subfamily A member 2	4	288.58
Q96EY1	DNJA3_HUMAN	53131.8	DnaJ homolog subfamily A member 3, mitochondrial	7	286.01
P25685	DNJB1_HUMAN	38191.4	DnaJ homolog subfamily B member 1	3	575.7
O75190	DNJB6_HUMAN	36121.9	DnaJ homolog subfamily B member 6	4	274.28
Q8IXB1	DJC10_HUMAN	92332.8	DnaJ homolog subfamily C member 10	5	248.9
Q9NVH1	DJC11_HUMAN	63523.8	DnaJ homolog subfamily C member 11	5	437.15
Q9Y5T4	DJC15_HUMAN	16372.8	DnaJ homolog subfamily C member 15	1	60.9
Q9NVM6	DJC17_HUMAN	34780.2	DnaJ homolog subfamily C member 17	1	89.16
Q5F1R6	DJC21_HUMAN	62473.5	DnaJ homolog subfamily C member 21	3	193.69
Q96LL9	DJC30_HUMAN	26059.3	DnaJ homolog subfamily C member 30	2	97.64
Q99615	DNJC7_HUMAN	57203	DnaJ homolog subfamily C member 7	5	295.17
O75937	DNJC8_HUMAN	29823.4	DnaJ homolog subfamily C member 8	7	482.34
P39656	OST48_HUMAN	50940	Dolichyl-diphosphooligosaccharide--protein glycosyltransferase 48 kDa subunit	6	595.56
P61803	DAD1_HUMAN	12659.6	Dolichyl-diphosphooligosaccharide--protein glycosyltransferase subunit DAD1	2	184.2
Q5QPK0	Q5QPK0_HUMAN	33425.6	Dolichyl-phosphate mannosyltransferase polypeptide 1, catalytic subunit (Fragment)	2	112.38
Q5SR62	Q5SR62_HUMAN	13439.2	Dolichyl-phosphate mannosyltransferase polypeptide 3	2	138.56
P49959	MRE11_HUMAN	80885.4	Double-strand break repair protein MRE11A	12	962.71
O60216	RAD21_HUMAN	71929.8	Double-strand-break repair protein rad21 homolog	21	1857.24
O95793	STAU1_HUMAN	63427.9	Double-stranded RNA-binding protein Staufen homolog 1	18	2327.81
Q14919	NC2A_HUMAN	22450	Dr1-associated corepressor	3	124.28
Q16643	DREB_HUMAN	71841.6	Drebrin	13	1982.55
Q9UJU6	DBNL_HUMAN	48462.7	Drebrin-like protein	3	178.41
Q9NZ23	Q9NZ23_HUMAN	14857.7	Drug-sensitive protein 1	2	153.63
Q4G1A1	Q4G1A1_HUMAN	38613.3	DSN1 protein	2	95.87
Q8TEA8	DTD1_HUMAN	23580	D-tyrosyl-tRNA(Tyr) deacylase 1	2	255.87
B5BUI8	B5BUI8_HUMAN	20792.5	Dual specificity phosphatase 3 (Fragment)	2	204.06
P49761	CLK3_HUMAN	74267.4	Dual specificity protein kinase CLK3	1	61.6
Q5T1I6	Q5T1I6_HUMAN	18228.7	Dynactin 3 (P22) (Fragment)	1	55.79
O60313	OPA1_HUMAN	112131	Dynamin-like 120 kDa protein, mitochondrial	1	55.89
P63167	DYL1_HUMAN	10530.2	Dynein light chain 1, cytoplasmic	6	1984.33
Q96FJ2	DYL2_HUMAN	10457.1	Dynein light chain 2, cytoplasmic	7	1417.71
Q96MF7	NSE2_HUMAN	28257.1	E3 SUMO-protein ligase NSE2	5	452.11
P49792	RBP2_HUMAN	362365	E3 SUMO-protein ligase RanBP2	88	7344.47
Q5VTR2	BRE1A_HUMAN	114220	E3 ubiquitin-protein ligase BRE1A	1	70.42
Q75N03	HAKAI_HUMAN	55111.2	E3 ubiquitin-protein ligase Hakai	3	86.62
Q9NX47	MARH5_HUMAN	31781.4	E3 ubiquitin-protein ligase MARCH5	5	848
Q06587	RING1_HUMAN	42973	E3 ubiquitin-protein ligase RING1	7	388.18
Q99496	RING2_HUMAN	38087.8	E3 ubiquitin-protein ligase RING2	8	1065.05
Q9UPN9	TRI33_HUMAN	124610	E3 ubiquitin-protein ligase TRIM33	5	210.82
Q96T88	UHRF1_HUMAN	91296.6	E3 ubiquitin-protein ligase UHRF1	24	3078.53
Q9BUP0	EFHD1_HUMAN	27024.9	EF-hand domain-containing protein D1	7	639.43
Q96C19	EFHD2_HUMAN	26794.5	EF-hand domain-containing protein D2	9	1001.03
A2VDI4	A2VDI4_HUMAN	76659.7	EFR3A protein (Fragment)	2	91.85
B7ZKK7	B7ZKK7_HUMAN	61928.4	EIF2AK2 protein	12	843.85
Q15717	ELAV1_HUMAN	36240.2	ELAV-like protein 1	15	3393.63
P13804	ETFA_HUMAN	35399.7	Electron transfer flavoprotein subunit alpha, mitochondrial	5	298.02
P38117	ETFB_HUMAN	28054.2	Electron transfer flavoprotein subunit beta	8	848.66
Q6IQ15	Q6IQ15_HUMAN	48181	Elongation factor 1-alpha	2	71.48
Q53G85	Q53G85_HUMAN	50423.2	Elongation factor 1-alpha (Fragment)	5	813.58
Q53HR5	Q53HR5_HUMAN	50435.2	Elongation factor 1-alpha (Fragment)	17	4344.48
Q9NZS6	Q9NZS6_HUMAN	46582.1	Elongation factor 1-alpha (Fragment)	1	78.83
Q53G89	Q53G89_HUMAN	47206.6	Elongation factor 1-alpha (Fragment)	1	90.27
Q05639	EF1A2_HUMAN	50780.4	Elongation factor 1-alpha 2	1	56.72
P24534	EF1B_HUMAN	24919.3	Elongation factor 1-beta	3	594.99
P29692	EF1D_HUMAN	31216.8	Elongation factor 1-delta	4	485.1
P26641	EF1G_HUMAN	50429.3	Elongation factor 1-gamma	12	724.93
P13639	EF2_HUMAN	96246.3	Elongation factor 2	34	2529.63
P49411	EFTU_HUMAN	49852.3	Elongation factor Tu, mitochondrial	5	295.61
P50402	EMD_HUMAN	29033	Emerin	14	2829.12
O94919	ENDD1_HUMAN	55722.5	Endonuclease domain-containing 1 protein	1	57.62
P78549	NTHL1_HUMAN	34767	Endonuclease III-like protein 1	3	367.53
Q7Z2K6	ERMP1_HUMAN	101023	Endoplasmic reticulum metallopeptidase 1	1	52.67
P30040	ERP29_HUMAN	29032.2	Endoplasmic reticulum protein ERp29	8	1434.19
O60869	EDF1_HUMAN	16358.9	Endothelial differentiation-related factor 1	5	971.41
Q9H1B7	EAP1_HUMAN	83576.3	Enhanced at puberty protein 1	2	136.99
Q96F86	EDC3_HUMAN	56783.6	Enhancer of mRNA-decapping protein 3	2	189.19
Q6P2E9	EDC4_HUMAN	152992	Enhancer of mRNA-decapping protein 4	15	896.08
Q52LR7	EPC2_HUMAN	91893.4	Enhancer of polycomb homolog 2	1	96.19
P84090	ERH_HUMAN	12422.1	Enhancer of rudimentary homolog	8	2957.29
Q9NPA8	ENY2_HUMAN	11635.4	Enhancer of yellow 2 transcription factor homolog	4	346.85
Q96FI6	Q96FI6_HUMAN	87958.6	Enhancer of zeste homolog 2 (Drosophila)	11	775.11
P30084	ECHM_HUMAN	31823.3	Enoyl-CoA hydratase, mitochondrial	6	740.59
P58107	EPIPL_HUMAN	555149	Epiplakin	11	660.93
Q53GG0	Q53GG0_HUMAN	85657.6	Epithelial protein lost in neoplasm beta variant (Fragment)	14	834.77
Q9UGP6	Q9UGP6_HUMAN	34700.5	Epsilon COP	1	70.42
P24390	ERD21_HUMAN	24754.1	ER lumen protein retaining receptor 1	2	72.25
O43731	ERD23_HUMAN	25238.4	ER lumen protein retaining receptor 3	1	59.39
O75477	ERLN1_HUMAN	39072.4	Erlin-1	5	506.57
O94905	ERLN2_HUMAN	38043.5	Erlin-2	10	1010.94
P27105	STOM_HUMAN	31881.8	Erythrocyte band 7 integral membrane protein	4	84.09
P30042	ES1_HUMAN	28494.9	ES1 protein homolog, mitochondrial	5	222.12
Q9H501	ESF1_HUMAN	99134.1	ESF1 homolog	5	345.15
Q5JP83	Q5JP83_HUMAN	131332	Euchromatic histone-lysine N-methyltransferase 2 (Fragment)	1	73.62
Q14240	IF4A2_HUMAN	46600.9	Eukaryotic initiation factor 4A-II	10	1462.04
P38919	IF4A3_HUMAN	47126.3	Eukaryotic initiation factor 4A-III	23	3131.11
P62495	ERF1_HUMAN	49228.2	Eukaryotic peptide chain release factor subunit 1	6	662.26
A9X7H1	A9X7H1_HUMAN	19480	Eukaryotic translation elongation factor 1 alpha (Fragment)	6	1477.29
O43324	MCA3_HUMAN	19855.4	Eukaryotic translation elongation factor 1 epsilon-1	3	261.36
P41567	EIF1_HUMAN	12838.6	Eukaryotic translation initiation factor 1	9	1049.1
P47813	IF1AX_HUMAN	16564.3	Eukaryotic translation initiation factor 1A, X-chromosomal	7	1762.93
P05198	IF2A_HUMAN	36374.5	Eukaryotic translation initiation factor 2 subunit 1	16	1975.37
P20042	IF2B_HUMAN	38706.5	Eukaryotic translation initiation factor 2 subunit 2	13	1086.43
P41091	IF2G_HUMAN	51647.4	Eukaryotic translation initiation factor 2 subunit 3	13	1384.8
O15371	EIF3D_HUMAN	64559.7	Eukaryotic translation initiation factor 3 subunit D	1	93.96
P60228	EIF3E_HUMAN	52586.5	Eukaryotic translation initiation factor 3 subunit E	2	108.07
O00303	EIF3F_HUMAN	37654.2	Eukaryotic translation initiation factor 3 subunit F	1	222.66
O75821	EIF3G_HUMAN	35874	Eukaryotic translation initiation factor 3 subunit G	1	86.41
Q13347	EIF3I_HUMAN	36877.8	Eukaryotic translation initiation factor 3 subunit I	1	67.87
Q9UBQ5	EIF3K_HUMAN	25328.5	Eukaryotic translation initiation factor 3 subunit K	5	254.39
A4D210	A4D210_HUMAN	89024.2	Eukaryotic translation initiation factor 3, subunit 9 eta, 116kDa	2	172.56
Q24JU4	Q24JU4_HUMAN	166768	Eukaryotic translation initiation factor 3, subunit A	7	200.26
B0QY89	B0QY89_HUMAN	71084.7	Eukaryotic translation initiation factor 3, subunit E interacting protein	4	107.6
Q04637	IF4G1_HUMAN	176168	Eukaryotic translation initiation factor 4 gamma 1	7	416.56
O60573	IF4E2_HUMAN	28458.2	Eukaryotic translation initiation factor 4E type 2	2	142.02
Q15056	IF4H_HUMAN	27425.5	Eukaryotic translation initiation factor 4H	5	844.88
P55010	IF5_HUMAN	49648	Eukaryotic translation initiation factor 5	5	155.82
P63241	IF5A1_HUMAN	17049.5	Eukaryotic translation initiation factor 5A-1	11	1836.83
O60841	IF2P_HUMAN	139171	Eukaryotic translation initiation factor 5B	10	570.83
Q9BQ95	ECSIT_HUMAN	49459	Evolutionarily conserved signaling intermediate in Toll pathway, mitochondrial	4	153.15
B0QYK1	B0QYK1_HUMAN	62754.1	Ewing sarcoma breakpoint region 1	5	529.45
Q5RKV6	EXOS6_HUMAN	28502.8	Exosome complex exonuclease MTR3	8	1075.62
Q13868	EXOS2_HUMAN	32996.2	Exosome complex exonuclease RRP4	9	1013.24
Q9NQT5	EXOS3_HUMAN	30009.5	Exosome complex exonuclease RRP40	9	842.2
Q9NPD3	EXOS4_HUMAN	26651.6	Exosome complex exonuclease RRP41	7	1190.08
Q15024	EXOS7_HUMAN	32442.3	Exosome complex exonuclease RRP42	6	394.95
Q96B26	EXOS8_HUMAN	30590.5	Exosome complex exonuclease RRP43	8	556.29
Q9NQT4	EXOS5_HUMAN	25746.1	Exosome complex exonuclease RRP46	6	1180.24
Q01780	EXOSX_HUMAN	101566	Exosome component 10	13	809.08
A5PLM5	A5PLM5_HUMAN	49515.3	Exosome component 9	8	804.7
O14980	XPO1_HUMAN	124447	Exportin-1	12	804.16
P55060	XPO2_HUMAN	111145	Exportin-2	6	311
Q9HAV4	XPO5_HUMAN	138332	Exportin-5	3	244.52
P15311	EZRI_HUMAN	69483.8	Ezrin	7	532.28
Q9Y5B9	SP16H_HUMAN	120409	FACT complex subunit SPT16	30	2504.37
Q08945	SSRP1_HUMAN	81366.6	FACT complex subunit SSRP1	22	2298.23
P52907	CAZA1_HUMAN	33073.4	F-actin-capping protein subunit alpha-1	8	1153.16
Q9BXW9	FACD2_HUMAN	168295	Fanconi anemia group D2 protein	1	68.23
Q9NVI1	FANCI_HUMAN	150769	Fanconi anemia group I protein	9	575.9
Q92945	FUBP2_HUMAN	73443.2	Far upstream element-binding protein 2	24	3291.21
Q96I24	FUBP3_HUMAN	61944.3	Far upstream element-binding protein 3	25	1777.04
Q96CS3	FAF2_HUMAN	52932.7	FAS-associated factor 2	4	271.86
Q16658	FSCN1_HUMAN	55123.3	Fascin	18	2307.49
Q9NYY8	FAKD2_HUMAN	82379.3	FAST kinase domain-containing protein 2	2	71.5
P49327	FAS_HUMAN	275850	Fatty acid synthase	17	886.68
Q01469	FABP5_HUMAN	15496.7	Fatty acid-binding protein, epidermal	7	627.24
Q9NVF7	FBX28_HUMAN	41408.5	F-box only protein 28	4	250.7
P02794	FRIH_HUMAN	21383.4	Ferritin heavy chain	1	81.84
B2ZZ80	B2ZZ80_HUMAN	248165	Filamin A	1	58.97
Q5HY53	Q5HY53_HUMAN	282581	Filamin A, alpha (Actin binding protein 280)	100	10990.8
Q60FE7	Q60FE7_HUMAN	278875	Filamin B	60	4391.23
Q14315	FLNC_HUMAN	293344	Filamin-C	15	998.59
P26885	FKBP2_HUMAN	15810.4	FK506-binding protein 2	2	209.64
Q00688	FKBP3_HUMAN	25218.3	FK506-binding protein 3	9	856.01
Q02790	FKBP4_HUMAN	52057.2	FK506-binding protein 4	16	1153.39
P39748	FEN1_HUMAN	42908.2	Flap endonuclease 1	2	137.88
P30043	BLVRB_HUMAN	22219.5	Flavin reductase	2	75.97
Q8NB78	AOF1_HUMAN	93592.8	Flavin-containing amine oxidase domain-containing protein 1	1	109.64
Q6ZNJ9	Q6ZNJ9_HUMAN	51594.8	FLJ00319 protein (Fragment)	1	160.85
Q8NF45	Q8NF45_HUMAN	200672	FLJ00353 protein (Fragment)	27	1646.33
Q9BTI6	Q9BTI6_HUMAN	42938.3	FLOT2 protein	11	683.58
B0V109	B0V109_HUMAN	39809.7	Flotillin 1 (Fragment)	1	92.06
O75955	FLOT1_HUMAN	47553.7	Flotillin-1	20	3467.17
Q14254	FLOT2_HUMAN	41830.3	Flotillin-2	13	1255.33
Q8N3X1	FNBP4_HUMAN	110637	Formin-binding protein 4	3	232.41
B2RCB2	B2RCB2_HUMAN	35853.5	Forty-two-three domain containing 1, isoform CRA_a	2	279.92
Q13642	FHL1_HUMAN	38006.3	Four and a half LIM domains protein 1	4	201.67
Q71RH4	Q71RH4_HUMAN	69809.2	FP1047	4	373.64
Q06787	FMR1_HUMAN	71473	Fragile X mental retardation 1 protein	2	163.96
P51114	FXR1_HUMAN	70020.1	Fragile X mental retardation syndrome-related protein 1	5	322.02
P51116	FXR2_HUMAN	74520.1	Fragile X mental retardation syndrome-related protein 2	3	157.75
B7Z3K9	B7Z3K9_HUMAN	49062.1	Fructose-bisphosphate aldolase	1	88.84
P04075	ALDOA_HUMAN	39851.5	Fructose-bisphosphate aldolase A	11	1342.06
Q24JR8	Q24JR8_HUMAN	27835.5	FtsJ homolog 2 (E. coli)	1	50.61
Q53GF9	Q53GF9_HUMAN	25791.4	Full-length cDNA 5-PRIME end of clone CS0DF013YM24 of Fetal brain of Homo sapiens (Human) variant (Fragment)	5	821.71
P07954	FUMH_HUMAN	54773.2	Fumarate hydratase, mitochondrial	1	48.79
B1AK40	B1AK40_HUMAN	27510	Fumarylacetoacetate hydrolase domain containing 1	1	86.26
Q5JRI3	Q5JRI3_HUMAN	22236	FUS interacting protein (Serine/arginine-rich) 1	8	1271.97
O75494	FUSIP_HUMAN	31338.9	FUS-interacting serine-arginine-rich protein 1	6	1014.53
Q8TBR3	Q8TBR3_HUMAN	53595.9	Fusion (Involved in t(12;16) in malignant liposarcoma)	10	2258.68
Q53GS0	Q53GS0_HUMAN	74240.9	G protein-binding protein CRFG variant (Fragment)	3	189.96
P34947	GRK5_HUMAN	68712.6	G protein-coupled receptor kinase 5	1	85.21
Q96AD6	Q96AD6_HUMAN	68331.8	G protein-coupled receptor kinase 6	1	54.72
P09382	LEG1_HUMAN	15048.3	Galectin-1	3	449.68
Q6B6N3	Q6B6N3_HUMAN	42034.8	Galphai2 protein	11	1436.07
P60520	GBRL2_HUMAN	13715.1	Gamma-aminobutyric acid receptor-associated protein-like 2	3	440.02
Q92820	GGH_HUMAN	36340.3	Gamma-glutamyl hydrolase	4	133.1
O75223	GGCT_HUMAN	21222.4	Gamma-glutamylcyclotransferase	2	127.4
Q8WUU5	GATD1_HUMAN	29014.6	GATA zinc finger domain-containing protein 1	2	67.13
O43716	GATCL_HUMAN	15190.7	GatC-like protein	0	97.04
Q9Y5B6	GCFC_HUMAN	105195	GC-rich sequence DNA-binding factor homolog	9	687.67
Q8TEQ6	GEMI5_HUMAN	170793	Gem-associated protein 5	3	184.06
Q8WXD5	GEMI6_HUMAN	18983.3	Gem-associated protein 6	0	67.6
Q9Y5Q9	TF3C3_HUMAN	102006	General transcription factor 3C polypeptide 3	1	120.24
Q9UKN8	TF3C4_HUMAN	93235	General transcription factor 3C polypeptide 4	2	45.22
Q6P1K8	T2H2L_HUMAN	45506.4	General transcription factor IIH subunit 2-like protein	2	112.43
Q6ZYL4	TF2H5_HUMAN	8105.21	General transcription factor IIH subunit 5	2	303.21
P78347	GTF2I_HUMAN	112859	General transcription factor II-I	5	458.43
Q9BY51	Q9BY51_HUMAN	21471.3	GL009	1	197.59
P60983	GMFB_HUMAN	16873.5	Glia maturation factor beta	2	225.72
Q96CS0	Q96CS0_HUMAN	54296.4	GLTSCR2 protein (Fragment)	5	731.25
Q96EK6	GNA1_HUMAN	21077.8	Glucosamine 6-phosphate N-acetyltransferase	2	191.87
B4DYA7	B4DYA7_HUMAN	58756.5	Glucose-6-phosphate 1-dehydrogenase	1	86.76
P06744	G6PI_HUMAN	63335.3	Glucose-6-phosphate isomerase	6	497.88
B9EGH3	B9EGH3_HUMAN	172080	Glutamyl-prolyl-tRNA synthetase	6	285.54
Q86SX6	GLRX5_HUMAN	16731.6	Glutaredoxin-related protein 5	3	407.74
P07203	GPX1_HUMAN	22218.1	Glutathione peroxidase 1	4	454.71
Q9Y2Q3	GSTK1_HUMAN	25594.3	Glutathione S-transferase kappa 1	1	96.42
P21266	GSTM3_HUMAN	26998.3	Glutathione S-transferase Mu 3	3	157.21
P78417	GSTO1_HUMAN	27833.2	Glutathione S-transferase omega-1	3	316.52
P09211	GSTP1_HUMAN	23569.1	Glutathione S-transferase P	10	1946.35
Q0QET7	Q0QET7_HUMAN	24775.7	Glyceraldehyde 3-phosphate dehydrogenase (Fragment)	3	189.44
P04406	G3P_HUMAN	36201.5	Glyceraldehyde-3-phosphate dehydrogenase	13	2284.52
Q5ZEY3	Q5ZEY3_HUMAN	9252.06	Glyceraldehyde-3-phosphate dehydrogenase (Fragment)	1	60.9
P32189	GLPK_HUMAN	62060.4	Glycerol kinase	18	2983.87
Q8WTR4	GDPD5_HUMAN	69112.3	Glycerophosphodiester phosphodiesterase domain-containing protein 5	1	51.46
P11216	PYGB_HUMAN	97318.8	Glycogen phosphorylase, brain form	3	356.14
Q9NZD2	GLTP_HUMAN	24005.5	Glycolipid transfer protein	1	123.66
Q8NBJ5	GT251_HUMAN	71932.6	Glycosyltransferase 25 family member 1	2	81.07
P30419	NMT1_HUMAN	57112	Glycylpeptide N-tetradecanoyltransferase 1	2	219.41
P49915	GUAA_HUMAN	77408.2	GMP synthase [glutamine-hydrolyzing]	10	570.48
Q92896	GSLG1_HUMAN	138341	Golgi apparatus protein 1	15	927.73
Q9H4G4	GAPR1_HUMAN	17321.6	Golgi-associated plant pathogenesis-related protein 1	3	645.85
Q08379	GOGA2_HUMAN	112217	Golgin subfamily A member 2	1	120.03
Q08378	GOGA3_HUMAN	167765	Golgin subfamily A member 3	1	59.22
Q7Z5G4	GOGA7_HUMAN	16042.1	Golgin subfamily A member 7	3	231.15
B9EGP9	B9EGP9_HUMAN	156012	GPATCH8 protein	1	56.07
Q8TAE8	G45IP_HUMAN	25425.2	Growth arrest and DNA-damage-inducible proteins-interacting protein 1	7	1270.08
P62993	GRB2_HUMAN	25304.5	Growth factor receptor-bound protein 2	4	244.2
Q9H3K2	GHITM_HUMAN	37351.7	Growth hormone-inducible transmembrane protein	2	448.28
Q9HAV7	GRPE1_HUMAN	24492	GrpE protein homolog 1, mitochondrial	5	256.61
P01112	RASH_HUMAN	21626.7	GTPase HRas	2	175.41
P01111	RASN_HUMAN	21500.6	GTPase NRas	2	184.23
P62826	RAN_HUMAN	24578.7	GTP-binding nuclear protein Ran	9	1789.7
O00178	GTPB1_HUMAN	73035.3	GTP-binding protein 1	2	129.86
A4D1E9	GTPBA_HUMAN	43190.7	GTP-binding protein 10	2	74.96
Q9P025	Q9P025_HUMAN	35042.5	GTP-binding protein 8.	1	104.06
Q15382	RHEB_HUMAN	20541.5	GTP-binding protein Rheb	1	97.88
Q9Y6B6	SAR1B_HUMAN	22509.5	GTP-binding protein SAR1b	2	148.39
Q8N652	Q8N652_HUMAN	41442.1	Guanine nucleotide binding protein (G protein), alpha z polypeptide	1	137.16
P63096	GNAI1_HUMAN	40905.4	Guanine nucleotide-binding protein G(i), alpha-1 subunit	8	368.58
P50151	GBG10_HUMAN	7371.74	Guanine nucleotide-binding protein G(I)/G(S)/G(O) subunit gamma-10	4	635.5
Q9UBI6	GBG12_HUMAN	8115.21	Guanine nucleotide-binding protein G(I)/G(S)/G(O) subunit gamma-12	5	892.98
P59768	GBG2_HUMAN	7959.08	Guanine nucleotide-binding protein G(I)/G(S)/G(O) subunit gamma-2	4	386.16
P50150	GBG4_HUMAN	8554.25	Guanine nucleotide-binding protein G(I)/G(S)/G(O) subunit gamma-4	1	161.58
P63218	GBG5_HUMAN	7427.85	Guanine nucleotide-binding protein G(I)/G(S)/G(O) subunit gamma-5	5	534.96
O60262	GBG7_HUMAN	7631	Guanine nucleotide-binding protein G(I)/G(S)/G(O) subunit gamma-7	2	159.89
P62879	GBB2_HUMAN	38048.3	Guanine nucleotide-binding protein G(I)/G(S)/G(T) subunit beta-2	12	1322.88
P08754	GNAI3_HUMAN	41076.5	Guanine nucleotide-binding protein G(k) subunit alpha	9	1135.24
Q5JWF2	GNAS1_HUMAN	111697	Guanine nucleotide-binding protein G(s) subunit alpha isoforms XLas	7	384.24
Q59FM5	Q59FM5_HUMAN	42149.5	Guanine nucleotide-binding protein G, alpha subunit variant (Fragment)	4	148.52
P63244	GBLP_HUMAN	35510.7	Guanine nucleotide-binding protein subunit beta-2-like 1	2	51.38
Q9BVP2	GNL3_HUMAN	62467.6	Guanine nucleotide-binding protein-like 3	14	1258.37
Q96HR8	NAF1_HUMAN	53897.2	H/ACA ribonucleoprotein complex non-core subunit NAF1	1	153.9
Q9NY12	GAR1_HUMAN	22505.2	H/ACA ribonucleoprotein complex subunit 1	4	618.1
Q9NX24	NHP2_HUMAN	17532	H/ACA ribonucleoprotein complex subunit 2	5	1847.95
Q9NPE3	NOP10_HUMAN	7757.99	H/ACA ribonucleoprotein complex subunit 3	9	1661.4
O60832	DKC1_HUMAN	58094	H/ACA ribonucleoprotein complex subunit 4	20	2923.17
O00165	HAX1_HUMAN	31601	HCLS1-associated protein X-1	3	279.89
Q96BR5	CA163_HUMAN	26433.3	Hcp beta-lactamase-like protein C1orf163	2	177.49
Q2V8N0	Q2V8N0_HUMAN	14384	HCV p7-transregulated protein 3 transcript variant 1	2	98.18
Q7Z4H3	HDDC2_HUMAN	23546.7	HD domain-containing protein 2	2	229.19
B2RWN5	B2RWN5_HUMAN	244275	HEAT repeat containing 1	41	3052.58
Q9H583	HEAT1_HUMAN	244382	HEAT repeat-containing protein 1	41	3010.66
P08107	HSP71_HUMAN	70294.1	Heat shock 70 kDa protein 1	32	8360.4
P34932	HSP74_HUMAN	95126.6	Heat shock 70 kDa protein 4	22	2017.93
Q59EJ3	Q59EJ3_HUMAN	78017.9	Heat shock 70kDa protein 1A variant (Fragment)	6	894.11
P11142	HSP7C_HUMAN	71082.3	Heat shock cognate 71 kDa protein	25	5007.04
O75506	HSBP1_HUMAN	8538.17	Heat shock factor-binding protein 1	3	397.36
Q92598	HS105_HUMAN	97716	Heat shock protein 105 kDa	5	254.23
Q9Y547	HSB11_HUMAN	16401.2	Heat shock protein beta-11	2	451.18
P07900	HS90A_HUMAN	85005.8	Heat shock protein HSP 90-alpha	16	1728.86
Q05DB4	Q05DB4_HUMAN	24014	HEBP2 protein (Fragment)	4	283.42
Q6ZRS2	SRCAP_HUMAN	344966	Helicase SRCAP	13	654.73
Q4ZGM8	Q4ZGM8_HUMAN	10789.5	Hemoglobin alpha-2 globin mutant (Fragment)	1	90.93
P69905	HBA_HUMAN	15305	Hemoglobin subunit alpha	3	202
O43504	HBXIP_HUMAN	9778.78	Hepatitis B virus X-interacting protein	5	1027.3
Q96RR5	Q96RR5_HUMAN	90136.1	Hepatocellular carcinoma-associated antigen 90	15	945.86
Q7Z4V5	HDGR2_HUMAN	74443.3	Hepatoma-derived growth factor-related protein 2	6	306.47
Q9Y3E1	HDGR3_HUMAN	22663	Hepatoma-derived growth factor-related protein 3	5	729.84
Q5SSJ5	HP1B3_HUMAN	61454.4	Heterochromatin protein 1-binding protein 3	10	966.1
Q13151	ROA0_HUMAN	30992.8	Heterogeneous nuclear ribonucleoprotein A0	13	3121.2
P09651	ROA1_HUMAN	38936.2	Heterogeneous nuclear ribonucleoprotein A1	25	52470.3
Q0VAC0	Q0VAC0_HUMAN	34245.3	Heterogeneous nuclear ribonucleoprotein A1	4	1662.07
Q32P51	RA1L2_HUMAN	34375.3	Heterogeneous nuclear ribonucleoprotein A1-like protein 2	2	293.36
P51991	ROA3_HUMAN	39798.7	Heterogeneous nuclear ribonucleoprotein A3	25	18865.7
Q14103	HNRPD_HUMAN	38581.4	Heterogeneous nuclear ribonucleoprotein D0	16	3241.8
O14979	HNRDL_HUMAN	46580.2	Heterogeneous nuclear ribonucleoprotein D-like	8	1871.08
P52597	HNRPF_HUMAN	45985	Heterogeneous nuclear ribonucleoprotein F	11	1569.95
P38159	HNRPG_HUMAN	42306.3	Heterogeneous nuclear ribonucleoprotein G	15	3580.25
P31943	HNRH1_HUMAN	49483.5	Heterogeneous nuclear ribonucleoprotein H	20	18363.2
P55795	HNRH2_HUMAN	49517.4	Heterogeneous nuclear ribonucleoprotein H2	13	3945.9
P31942	HNRH3_HUMAN	36960.1	Heterogeneous nuclear ribonucleoprotein H3	15	5412.14
Q8WVV9	HNRLL_HUMAN	60900.2	Heterogeneous nuclear ribonucleoprotein L-like	9	961.44
P52272	HNRPM_HUMAN	77749.4	Heterogeneous nuclear ribonucleoprotein M	55	10703.7
O60506	HNRPQ_HUMAN	69787.7	Heterogeneous nuclear ribonucleoprotein Q	24	3150.62
O43390	HNRPR_HUMAN	71184.4	Heterogeneous nuclear ribonucleoprotein R	26	4931.08
Q00839	HNRPU_HUMAN	91198.2	Heterogeneous nuclear ribonucleoprotein U	38	7742.95
Q5RI18	Q5RI18_HUMAN	27900.5	Heterogeneous nuclear ribonucleoprotein U (Scaffold attachment factor A) (Fragment)	6	495.83
Q9BUJ2	HNRL1_HUMAN	96249.5	Heterogeneous nuclear ribonucleoprotein U-like protein 1	7	911.06
Q1KMD3	HNRL2_HUMAN	85622.4	Heterogeneous nuclear ribonucleoprotein U-like protein 2	29	3224.84
P22626	ROA2_HUMAN	37463.8	Heterogeneous nuclear ribonucleoproteins A2/B1	28	40656
P07910	HNRPC_HUMAN	33706.6	Heterogeneous nuclear ribonucleoproteins C1/C2	18	25463.8
P19367	HXK1_HUMAN	103561	Hexokinase-1	8	811.93
Q9Y241	HIG1A_HUMAN	10136.2	HIG1 domain family member 1A	2	321.28
Q9BW72	HIG2A_HUMAN	11578.1	HIG1 domain family member 2A	2	68.27
Q5T6U8	Q5T6U8_HUMAN	10672.6	High mobility group AT-hook 1	2	272.56
Q15651	HMGN3_HUMAN	10659.5	High mobility group nucleosome-binding domain-containing protein 3	2	211.04
O00479	HMGN4_HUMAN	9533.23	High mobility group nucleosome-binding domain-containing protein 4	1	126.59
Q9NP66	HM20A_HUMAN	40119.1	High mobility group protein 20A	6	399.35
P09429	HMGB1_HUMAN	25049.2	High mobility group protein B1	12	2465.98
O15347	HMGB3_HUMAN	23136.5	High mobility group protein B3	11	2550.92
P17096	HMGA1_HUMAN	11669.1	High mobility group protein HMG-I/HMG-Y	2	764.26
P52926	HMGA2_HUMAN	11825.1	High mobility group protein HMGI-C	4	296.08
Q59GW1	Q59GW1_HUMAN	20322.4	High-mobility group box 1 variant (Fragment)	1	71.61
Q5U071	Q5U071_HUMAN	24060.8	High-mobility group box 2	12	2491.96
Q9BW71	HIRP3_HUMAN	62262.1	HIRA-interacting protein 3	2	64.71
P49773	HINT1_HUMAN	13907.1	Histidine triad nucleotide-binding protein 1	3	344.72
Q9BX68	HINT2_HUMAN	17208.3	Histidine triad nucleotide-binding protein 2	4	176.92
P12081	SYHC_HUMAN	57944.4	Histidyl-tRNA synthetase, cytoplasmic	4	158.54
O95251	MYST2_HUMAN	71282.4	Histone acetyltransferase MYST2	9	564.77
Q92794	MYST3_HUMAN	227566	Histone acetyltransferase MYST3	2	76.91
Q9Y294	ASF1A_HUMAN	23125.2	Histone chaperone ASF1A	2	321.37
Q9NVP2	ASF1B_HUMAN	22761.2	Histone chaperone ASF1B	2	59.79
Q13547	HDAC1_HUMAN	55637.9	Histone deacetylase 1	9	943.27
Q92769	HDAC2_HUMAN	55899	Histone deacetylase 2	8	742.04
O00422	SAP18_HUMAN	17607	Histone deacetylase complex subunit SAP18	11	1357.25
O75446	SAP30_HUMAN	23577	Histone deacetylase complex subunit SAP30	1	52.74
P07305	H10_HUMAN	20850.2	Histone H1.0	4	458.53
Q02539	H11_HUMAN	21828.9	Histone H1.1	5	772.18
P16403	H12_HUMAN	21351.8	Histone H1.2	8	1340.42
P16402	H13_HUMAN	22336.3	Histone H1.3	7	1241.86
P10412	H14_HUMAN	21852	Histone H1.4	5	350.62
Q92522	H1X_HUMAN	22473.5	Histone H1x	4	347.5
Q99878	H2A1J_HUMAN	13927.8	Histone H2A type 1-J	6	10073.7
Q8IUE6	H2A2B_HUMAN	13986.8	Histone H2A type 2-B	3	454.31
P16104	H2AX_HUMAN	15135.4	Histone H2A.x	4	6754.31
P0C0S5	H2AZ_HUMAN	13544.5	Histone H2A.Z	4	7484.44
P33778	H2B1B_HUMAN	13941.6	Histone H2B type 1-B	7	4448.03
P62807	H2B1C_HUMAN	13810.5	Histone H2B type 1-C/E/F/G/I	1	241.73
P58876	H2B1D_HUMAN	13927.6	Histone H2B type 1-D	5	846.35
Q93079	H2B1H_HUMAN	13883.5	Histone H2B type 1-H	2	375.83
Q99880	H2B1L_HUMAN	13943.6	Histone H2B type 1-L	6	4411.6
P23527	H2B1O_HUMAN	13897.6	Histone H2B type 1-O	10	12430.6
Q16778	H2B2E_HUMAN	13911.6	Histone H2B type 2-E	5	994.93
Q8N257	H2B3B_HUMAN	13899.5	Histone H2B type 3-B	1	126.18
P57053	H2BFS_HUMAN	13935.6	Histone H2B type F-S	10	13109.9
Q5TEC6	Q5TEC6_HUMAN	15477.6	Histone H3	1	54.78
Q71DI3	H32_HUMAN	15435.5	Histone H3.2	6	3022.03
P62805	H4_HUMAN	11360.4	Histone H4	16	33490.5
Q09028	RBBP4_HUMAN	47911.2	Histone-binding protein RBBP4	9	776.43
Q16576	RBBP7_HUMAN	48132.3	Histone-binding protein RBBP7	8	695.44
1858	HRX_HUMAN	436058	Histone-lysine N-methyltransferase HRX	2	172.84
Q9BZ95	NSD3_HUMAN	165330	Histone-lysine N-methyltransferase NSD3	1	61.67
Q5STU3	Q5STU3_HUMAN	49478.1	HLA-B associated transcript 1	1	86.16
B0S4X5	B0S4X5_HUMAN	22300	HLA-B associated transcript 1 (Fragment)	8	2317.05
Q6NTA2	Q6NTA2_HUMAN	62515.3	HNRNPL protein (Fragment)	25	4415.6
P39880	CUX1_HUMAN	164629	Homeobox protein cut-like 1	16	1641.61
P55347	PKNX1_HUMAN	47975.8	Homeobox protein PKNOX1	2	144.78
Q15475	SIX1_HUMAN	32418.3	Homeobox protein SIX1	2	88.51
Q9P2W1	HOP2_HUMAN	25061.8	Homologous-pairing protein 2 homolog	1	63.79
Q5DT20	Q5DT20_HUMAN	283111	Hornerin	2	110.7
Q53FE7	Q53FE7_HUMAN	87703.7	Host cell factor C2 variant (Fragment)	2	82.74
P50502	F10A1_HUMAN	41476.5	Hsc70-interacting protein	5	364.68
Q9NZL4	HPBP1_HUMAN	40189.8	Hsp70-binding protein 1	2	193.33
Q16543	CDC37_HUMAN	44953.2	Hsp90 co-chaperone Cdc37	1	81.89
Q96IS6	Q96IS6_HUMAN	64804.2	HSPA8 protein (Fragment)	2	347.2
Q9Y6E3	Q9Y6E3_HUMAN	42872.2	HSPC027	1	54.94
Q9NX55	HYPK_HUMAN	19376.8	Huntingtin-interacting protein K	4	298.84
Q16836	HCDH_HUMAN	34312.9	Hydroxyacyl-coenzyme A dehydrogenase, mitochondrial	1	150.01
Q16775	GLO2_HUMAN	29183.8	Hydroxyacylglutathione hydrolase	2	157.43
Q96JB3	HIC2_HUMAN	67140.4	Hypermethylated in cancer 2 protein	2	70.59
P00492	HPRT_HUMAN	24791.7	Hypoxanthine-guanine phosphoribosyltransferase	6	539.5
Q9Y4L1	HYOU1_HUMAN	111494	Hypoxia up-regulated protein 1	5	314.93
Q86YQ0	Q86YQ0_HUMAN	85636.3	HZGJ	3	247.89
Q6PJF2	Q6PJF2_HUMAN	25789.8	IGK@ protein	1	119
Q6IPD8	Q6IPD8_HUMAN	65675.8	IK cytokine, down-regulator of HLA II	15	848.08
Q14197	ICT1_HUMAN	23843.5	Immature colon carcinoma transcript 1 protein	5	745.53
Q9Y5U9	IR3IP_HUMAN	9019.96	Immediate early response 3-interacting protein 1	2	222.65
Q59FI4	Q59FI4_HUMAN	139880	Importin 4 variant (Fragment)	2	59.85
O00505	IMA3_HUMAN	58288	Importin subunit alpha-3	9	718.32
O00629	IMA4_HUMAN	58363.8	Importin subunit alpha-4	9	910.03
O15131	IMA5_HUMAN	61052.2	Importin subunit alpha-6	8	765.04
O60684	IMA7_HUMAN	60732.7	Importin subunit alpha-7	10	1081.13
Q14974	IMB1_HUMAN	98419.5	Importin subunit beta-1	38	6837.59
O00410	IPO5_HUMAN	125032	Importin-5	6	440.26
O95373	IPO7_HUMAN	120751	Importin-7	4	243.99
Q96P70	IPO9_HUMAN	116858	Importin-9	1	65.85
Q9UNL4	ING4_HUMAN	28968.2	Inhibitor of growth protein 4	2	103.58
Q8WYH8	ING5_HUMAN	28245.9	Inhibitor of growth protein 5	4	172.37
Q9NQS7	INCE_HUMAN	105764	Inner centromere protein	7	436.23
Q9Y2U8	MAN1_HUMAN	100790	Inner nuclear membrane protein Man1	9	1019.57
Q6PI98	IN80C_HUMAN	20629.7	INO80 complex subunit C	4	500.18
Q15181	IPYR_HUMAN	33095.3	Inorganic pyrophosphatase	3	195.55
Q9BY32	ITPA_HUMAN	21831	Inosine triphosphate pyrophosphatase	2	180.36
P12268	IMDH2_HUMAN	56225.8	Inosine-5'-monophosphate dehydrogenase 2	2	62.14
Q14571	ITPR2_HUMAN	311074	Inositol 1,4,5-trisphosphate receptor type 2	1	110.62
Q9NZI8	IF2B1_HUMAN	63759.2	Insulin-like growth factor 2 mRNA-binding protein 1	14	1039.64
Q9Y6M1	IF2B2_HUMAN	66194.7	Insulin-like growth factor 2 mRNA-binding protein 2	13	1353.88
O00425	IF2B3_HUMAN	64022.7	Insulin-like growth factor 2 mRNA-binding protein 3	5	325.56
Q9NVR2	INT10_HUMAN	83209.3	Integrator complex subunit 10	2	81.55
Q68E01	INT3_HUMAN	119533	Integrator complex subunit 3	4	177.31
Q96HW7	INT4_HUMAN	109071	Integrator complex subunit 4	2	204.79
Q6P9B9	INT5_HUMAN	109239	Integrator complex subunit 5	1	138.76
Q8IU81	I2BP1_HUMAN	62561.3	Interferon regulatory factor 2-binding protein 1	2	232.93
O75569	PRKRA_HUMAN	34838.7	Interferon-inducible double stranded RNA-dependent protein kinase activator A	6	433.51
Q7Z6F6	Q7Z6F6_HUMAN	57898.3	Interferon-inducible double-stranded RNA-dependent protein kinase	2	142.01
Q9H9L3	I20L2_HUMAN	39414.7	Interferon-stimulated 20 kDa exonuclease-like 2	1	128.61
Q12905	ILF2_HUMAN	43263.3	Interleukin enhancer-binding factor 2	22	5598.1
Q12906	ILF3_HUMAN	95678.2	Interleukin enhancer-binding factor 3	43	6419.42
O60306	AQR_HUMAN	172270	Intron-binding protein aquarius	12	651.88
Q96AB3	ISOC2_HUMAN	22608	Isochorismatase domain-containing protein 2, mitochondrial	1	140.42
Q53GL5	Q53GL5_HUMAN	51334	Isocitrate dehydrogenase 2 (NADP+), mitochondrial variant (Fragment)	1	81.18
Q9NSE4	SYIM_HUMAN	114688	Isoleucyl-tRNA synthetase, mitochondrial	1	112.01
P53990	IST1_HUMAN	39896.5	IST1 homolog	3	78.54
Q6FHM7	Q6FHM7_HUMAN	35840.2	JUN protein	3	192.38
P14923	PLAK_HUMAN	82434	Junction plakoglobin	24	1803.83
Q5BKZ2	Q5BKZ2_HUMAN	60954.9	Karyopherin alpha 1 (Importin alpha 5)	11	1359.1
Q8NAB2	KBTB3_HUMAN	70775.4	Kelch repeat and BTB domain-containing protein 3	1	252.69
Q8IXQ5	KLHL7_HUMAN	67089.4	Kelch-like protein 7	7	443.59
Q07666	KHDR1_HUMAN	48311.2	KH domain-containing, RNA-binding, signal transduction-associated protein 1	9	1271.38
Q5TG62	Q5TG62_HUMAN	109808	KIAA0090	2	130.56
B9EGM8	B9EGM8_HUMAN	93865.2	KIF18B protein	2	261.28
Q96EK5	KBP_HUMAN	72452.6	KIF1-binding protein	2	79.57
Q9ULH0	KDIS_HUMAN	198016	Kinase D-interacting substrate of 220 kDa	2	123.01
Q86UP2	KTN1_HUMAN	156464	Kinectin	2	44.52
Q9H0B6	KLC2_HUMAN	69291.4	Kinesin light chain 2	2	81.06
P33176	KINH_HUMAN	110358	Kinesin-1 heavy chain	7	476.63
O95235	KI20A_HUMAN	101242	Kinesin-like protein KIF20A	20	1626.02
Q14807	KIF22_HUMAN	73615.8	Kinesin-like protein KIF22	7	390.5
Q02241	KIF23_HUMAN	111016	Kinesin-like protein KIF23	1	94.45
Q9BW19	KIFC1_HUMAN	74272.5	Kinesin-like protein KIFC1	6	263.61
Q8NBT2	SPC24_HUMAN	22486.4	Kinetochore protein Spc24	2	122.54
Q9HBM1	SPC25_HUMAN	26193.5	Kinetochore protein Spc25	2	84.95
Q96IY1	NSL1_HUMAN	32540.6	Kinetochore-associated protein NSL1 homolog	2	127.98
Q13601	KRR1_HUMAN	43865.8	KRR1 small subunit processome component homolog	4	236.81
B3VMW0	B3VMW0_HUMAN	80188.7	Lactoferrin	2	45.19
Q2TUW9	Q2TUW9_HUMAN	79812.4	Lactoferrin	2	112.7
Q04760	LGUL_HUMAN	20992.3	Lactoylglutathione lyase	8	432.74
Q5TCJ3	Q5TCJ3_HUMAN	65152.6	Lamin A/C	42	6437.4
B2R5P3	B2R5P3_HUMAN	71084.2	Lamin B receptor, isoform CRA_a	14	1078.33
P42166	LAP2A_HUMAN	76015.8	Lamina-associated polypeptide 2, isoform alpha	25	2162.45
P42167	LAP2B_HUMAN	50696.5	Lamina-associated polypeptide 2, isoforms beta/gamma	24	4294.71
P20700	LMNB1_HUMAN	66652.7	Lamin-B1	46	10284.7
Q03252	LMNB2_HUMAN	67761.5	Lamin-B2	39	5476.43
Q9NRN7	ADPPT_HUMAN	35981.2	L-aminoadipate-semialdehyde dehydrogenase-phosphopantetheinyl transferase	2	114.58
Q6PKG0	LARP1_HUMAN	123833	La-related protein 1	6	399.65
Q71RC2	LARP4_HUMAN	81230.1	La-related protein 4	1	42.25
Q4G0J3	LARP7_HUMAN	67142.5	La-related protein 7	4	385.93
Q9H089	LSG1_HUMAN	75862.6	Large subunit GTPase 1 homolog	2	66.4
Q9Y4W2	LAS1L_HUMAN	83982.2	LAS1-like protein	14	1687.58
Q8NC56	LEMD2_HUMAN	57338.7	LEM domain-containing protein 2	14	1800.34
O95202	LETM1_HUMAN	83986.2	LETM1 and EF-hand domain-containing protein 1, mitochondrial	2	242.03
Q86V48	LUZP1_HUMAN	120772	Leucine zipper protein 1	5	272.42
P42704	LPPRC_HUMAN	159003	Leucine-rich PPR motif-containing protein, mitochondrial	26	1835.66
Q96AG4	LRC59_HUMAN	35308	Leucine-rich repeat-containing protein 59	3	191.29
B0VJY9	B0VJY9_HUMAN	88957.3	Leukocyte receptor cluster (LRC) member 8	2	107.53
P09960	LKHA4_HUMAN	69868.5	Leukotriene A-4 hydrolase	1	56.04
Q8WWI1	LMO7_HUMAN	194016	LIM domain only protein 7	3	83.87
Q9BT23	LIMD2_HUMAN	14460	LIM domain-containing protein 2	2	229.85
A7E2T3	A7E2T3_HUMAN	25428.5	LIN28B protein (Fragment)	1	152.72
Q53FX5	Q53FX5_HUMAN	21920.5	Lin-7 homolog C variant (Fragment)	6	850.1
A3R0T7	A3R0T7_HUMAN	21866	Liver histone H1e	5	373.38
B7Z5E3	B7Z5E3_HUMAN	40097	L-lactate dehydrogenase	12	1147.4
P07195	LDHB_HUMAN	36900.2	L-lactate dehydrogenase B chain	15	1029.71
B2RTQ5	B2RTQ5_HUMAN	152075	LRRC16A protein	1	44.07
P05455	LA_HUMAN	46979.2	Lupus La protein	11	696.36
Q7Z4W1	DCXR_HUMAN	26181.7	L-xylulose reductase	4	366.8
Q9NRZ9	HELLS_HUMAN	97639.4	Lymphoid-specific helicase	5	290.81
Q6NUK7	Q6NUK7_HUMAN	66223	LYN protein (Fragment)	11	577.12
Q9HD34	LYRM4_HUMAN	10751.8	LYR motif-containing protein 4	2	134.05
Q5U5X0	LYRM7_HUMAN	12004.5	LYR motif-containing protein 7	1	242.74
Q9Y2K7	KDM2A_HUMAN	135159	Lysine-specific demethylase 2A	6	250.23
Q8NHM5	KDM2B_HUMAN	154969	Lysine-specific demethylase 2B	3	176.47
P29375	KDM5A_HUMAN	194823	Lysine-specific demethylase 5A	5	143.62
Q9UGL1	KDM5B_HUMAN	178668	Lysine-specific demethylase 5B	3	293.2
Q8NF37	PCAT1_HUMAN	59740.6	Lysophosphatidylcholine acyltransferase 1	3	461.04
P61626	LYSC_HUMAN	16982.5	Lysozyme C	1	81.17
P14174	MIF_HUMAN	12639.3	Macrophage migration inhibitory factor	3	1111.43
B1AK44	B1AK44_HUMAN	25960.7	MAD2 mitotic arrest deficient-like 2 (Yeast)	1	83.29
Q9HD23	MRS2_HUMAN	50684.6	Magnesium transporter MRS2 homolog, mitochondrial	3	187.88
Q9H0U3	MAGT1_HUMAN	38410.6	Magnesium transporter protein 1	2	79.26
P07199	CENPB_HUMAN	65530.7	Major centromere autoantigen B	2	201.89
O75942	O75942_HUMAN	30976.6	Major prion protein	1	113.35
A1YVW6	A1YVW6_HUMAN	27854.3	Major prion protein	1	98.82
Q6FHZ0	Q6FHZ0_HUMAN	35993	Malate dehydrogenase	14	1799.17
P40925	MDHC_HUMAN	36631.1	Malate dehydrogenase, cytoplasmic	4	512.67
Q14165	MLEC_HUMAN	32384.7	Malectin	5	651.61
Q9ULC4	MCTS1_HUMAN	20769.9	Malignant T cell amplified sequence 1	8	721.08
Q13724	MOGS_HUMAN	92031.6	Mannosyl-oligosaccharide glucosidase	1	187.55
P49006	MRP_HUMAN	19574.2	MARCKS-related protein	3	85.99
P43243	MATR3_HUMAN	95078	Matrin-3	39	6044.08
Q8IWI9	MGAP_HUMAN	333784	MAX gene-associated protein	3	90.35
Q8IUI2	Q8IUI2_HUMAN	29514.4	MAZ protein	2	249.67
Q9HB66	Q9HB66_HUMAN	7258.93	McKusick-Kaufman syndrome, isoform CRA_a	2	293.89
Q5T8T8	Q5T8T8_HUMAN	16079.1	Mediator complex subunit 22 (Fragment)	1	156.89
Q14676	MDC1_HUMAN	227669	Mediator of DNA damage checkpoint protein 1	47	5691.38
Q15648	MED1_HUMAN	169342	Mediator of RNA polymerase II transcription subunit 1	1	67.51
Q9BTT4	MED10_HUMAN	15792.1	Mediator of RNA polymerase II transcription subunit 10	1	140.15
Q9P086	MED11_HUMAN	13234.7	Mediator of RNA polymerase II transcription subunit 11	3	434.7
Q9H944	MED20_HUMAN	23662.6	Mediator of RNA polymerase II transcription subunit 20	3	180.84
Q13503	MED21_HUMAN	15725.8	Mediator of RNA polymerase II transcription subunit 21	2	77.86
Q9ULK4	MED23_HUMAN	158254	Mediator of RNA polymerase II transcription subunit 23	2	170.59
Q9H204	MED28_HUMAN	19679.1	Mediator of RNA polymerase II transcription subunit 28	1	98.08
Q96HR3	MED30_HUMAN	20435.3	Mediator of RNA polymerase II transcription subunit 30	2	248.91
Q9NPJ6	MED4_HUMAN	29783.9	Mediator of RNA polymerase II transcription subunit 4	2	105.4
Q96MG7	MAGG1_HUMAN	34343.8	Melanoma-associated antigen G1	3	294.93
P08582	TRFM_HUMAN	81787	Melanotransferrin	3	156.25
Q8N4V1	MMGT1_HUMAN	14733.6	Membrane magnesium transporter 1	2	366.27
O00264	PGRC1_HUMAN	21771.8	Membrane-associated progesterone receptor component 1	5	1418.36
A5HBC8	A5HBC8_HUMAN	67866.8	Menin L413R variant	13	1143.06
P35240	MERL_HUMAN	69874	Merlin	4	200.57
Q14696	MESD2_HUMAN	26231.4	Mesoderm development candidate 2	6	296.31
Q96E52	OMA1_HUMAN	60765.7	Metalloendopeptidase OMA1, mitochondrial	1	67.3
Q9Y483	MTF2_HUMAN	68301.2	Metal-response element-binding transcription factor 2	2	116.45
A5PLK4	A5PLK4_HUMAN	81508.6	Metastasis associated 1	8	729.89
Q9HC85	Q9HC85_HUMAN	10413.5	Metastasis related protein (Fragment)	2	55.59
Q13330	MTA1_HUMAN	81421.6	Metastasis-associated protein MTA1	1	90.87
O94776	MTA2_HUMAN	75717	Metastasis-associated protein MTA2	3	124.01
Q9BTC8	MTA3_HUMAN	68202.3	Metastasis-associated protein MTA3	3	224.6
Q13505	MTX1_HUMAN	51672.7	Metaxin-1	4	276.2
O75431	MTX2_HUMAN	30086.2	Metaxin-2	9	1769.73
Q5HYI7	MTX3_HUMAN	35299.3	Metaxin-3	6	575.45
Q7Z380	Q7Z380_HUMAN	32771.2	Metaxin-3. (Fragment)	2	80.14
Q9NZL9	MAT2B_HUMAN	37870.3	Methionine adenosyltransferase 2 subunit beta	1	117.6
Q8NB11	Q8NB11_HUMAN	51334.1	Methionine aminopeptidase	3	105.79
P53582	AMPM1_HUMAN	44099.6	Methionine aminopeptidase 1	8	702.21
P56192	SYMC_HUMAN	102249	Methionyl-tRNA synthetase, cytoplasmic	3	103.02
O95983	MBD3_HUMAN	33051.4	Methyl-CpG-binding domain protein 3	7	609.22
P51608	MECP2_HUMAN	52579.7	Methyl-CpG-binding protein 2	4	655.28
P54105	ICLN_HUMAN	26370	Methylosome subunit pICln	2	169.41
B0UZ11	B0UZ11_HUMAN	38024.9	MHC class I polypeptide-related sequence B	1	163.47
P22670	RFX1_HUMAN	105005	MHC class II regulatory factor RFX1	2	318
P55081	MFAP1_HUMAN	51926.6	Microfibrillar-associated protein 1	12	985.1
Q99735	MGST2_HUMAN	16780.9	Microsomal glutathione S-transferase 2	2	106.76
O14880	MGST3_HUMAN	16733.7	Microsomal glutathione S-transferase 3	4	996.66
A2BDK6	A2BDK6_HUMAN	257692	Microtubule-associated protein 1B	2	354.7
Q15691	MARE1_HUMAN	30151.2	Microtubule-associated protein RP/EB family member 1	9	1118.04
Q9GZQ8	MLP3B_HUMAN	14678.7	Microtubule-associated proteins 1A/1B light chain 3B	2	74.54
Q9HBL5	Q9HBL5_HUMAN	35094.5	MIF4G domain-containing protein.	2	66.68
Q8N183	MIMIT_HUMAN	19844	Mimitin, mitochondrial	4	278.09
Q53HJ4	Q53HJ4_HUMAN	91551.2	Minichromosome maintenance protein 3 variant (Fragment)	30	3552.38
Q8WV92	MITD1_HUMAN	29638.1	MIT domain-containing protein 1	1	110.64
Q9UDX5	MTP18_HUMAN	18055.6	Mitochondrial 18 kDa protein	5	537.36
Q9BQT8	ODC_HUMAN	33452.7	Mitochondrial 2-oxodicarboxylate carrier	2	62.54
Q02978	M2OM_HUMAN	34210.9	Mitochondrial 2-oxoglutarate/malate carrier protein	12	2301.75
Q7Z434	MAVS_HUMAN	57063.3	Mitochondrial antiviral-signaling protein	4	198.7
O43772	MCAT_HUMAN	33264.2	Mitochondrial carnitine/acylcarnitine carrier protein	5	435.37
B2RCE3	B2RCE3_HUMAN	40235.7	Mitochondrial carrier homolog 1 (C. elegans), isoform CRA_d	7	510.85
Q9Y6C9	MTCH2_HUMAN	33936.1	Mitochondrial carrier homolog 2	14	3249.04
Q9UBX3	DIC_HUMAN	31718.5	Mitochondrial dicarboxylate carrier	10	685.52
Q9Y3D6	FIS1_HUMAN	16984	Mitochondrial fission 1 protein	2	249.05
Q9H936	GHC1_HUMAN	34904.4	Mitochondrial glutamate carrier 1	2	86.07
P62072	TIM10_HUMAN	10554	Mitochondrial import inner membrane translocase subunit Tim10	6	849.19
Q9Y5L4	TIM13_HUMAN	10721.1	Mitochondrial import inner membrane translocase subunit Tim13	7	1389.37
Q96DA6	TIM14_HUMAN	12490.7	Mitochondrial import inner membrane translocase subunit TIM14	3	234.79
Q9Y3D7	TIM16_HUMAN	13816.2	Mitochondrial import inner membrane translocase subunit Tim16	3	299.19
O60830	TI17B_HUMAN	18432.4	Mitochondrial import inner membrane translocase subunit Tim17-B	5	972.7
Q9Y584	TIM22_HUMAN	20360	Mitochondrial import inner membrane translocase subunit Tim22	1	116.56
O14925	TIM23_HUMAN	22100.1	Mitochondrial import inner membrane translocase subunit Tim23	4	696.88
O60220	TIM8A_HUMAN	11219.4	Mitochondrial import inner membrane translocase subunit Tim8 A	4	296.02
Q9Y5J9	TIM8B_HUMAN	9565.62	Mitochondrial import inner membrane translocase subunit Tim8 B	4	689.25
Q9Y5J7	TIM9_HUMAN	10599.2	Mitochondrial import inner membrane translocase subunit Tim9	4	581.27
Q9Y5J6	TIM9B_HUMAN	11806.8	Mitochondrial import inner membrane translocase subunit Tim9 B	4	392.16
Q15388	TOM20_HUMAN	16458.7	Mitochondrial import receptor subunit TOM20 homolog	2	563.91
Q9NS69	TOM22_HUMAN	15511.8	Mitochondrial import receptor subunit TOM22 homolog	8	5495.51
Q15785	TOM34_HUMAN	34936.9	Mitochondrial import receptor subunit TOM34	1	78.65
O96008	TOM40_HUMAN	38211.3	Mitochondrial import receptor subunit TOM40 homolog	14	2648.88
Q8N4H5	TOM5_HUMAN	6031.37	Mitochondrial import receptor subunit TOM5 homolog	4	298.38
Q96B49	TOM6_HUMAN	7997.05	Mitochondrial import receptor subunit TOM6 homolog	0	149.81
Q9P0U1	TOM7_HUMAN	6244.44	Mitochondrial import receptor subunit TOM7 homolog	2	112.01
O94826	TOM70_HUMAN	68096.3	Mitochondrial import receptor subunit TOM70	15	1556.43
Q96T52	IMP2L_HUMAN	19819.4	Mitochondrial inner membrane protease subunit 2	2	54.1
Q16891	IMMT_HUMAN	84025.5	Mitochondrial inner membrane protein	30	2981.03
Q15070	OXA1L_HUMAN	48915.7	Mitochondrial inner membrane protein OXA1L	3	104.58
Q7RU05	Q7RU05_HUMAN	18097	Mitochondrial inner membrane translocase	3	254.88
Q8N4Q1	MIA40_HUMAN	16385.2	Mitochondrial intermembrane space import and assembly protein 40	2	225.71
Q8IXI2	MIRO1_HUMAN	71765.3	Mitochondrial Rho GTPase 1	6	436.28
Q8IXI1	MIRO2_HUMAN	69101.1	Mitochondrial Rho GTPase 2	6	380.49
Q53G19	Q53G19_HUMAN	20699.4	Mitochondrial ribosomal protein L11 isoform a variant (Fragment)	3	180.44
Q0D2Q7	Q0D2Q7_HUMAN	18678.1	Mitochondrial ribosomal protein L30	2	124.03
B1AL10	B1AL10_HUMAN	18013.3	Mitochondrial ribosomal protein L43	5	368.72
A6NMQ8	A6NMQ8_HUMAN	13641.1	Mitochondrial ribosomal protein L52, isoform CRA_d	1	149.37
A6XND3	A6XND3_HUMAN	30919.3	Mitochondrial ribosomal protein S18A	3	363.44
Q53G62	Q53G62_HUMAN	20928.8	Mitochondrial ribosomal protein S28 variant (Fragment)	2	299.19
Q53GN7	Q53GN7_HUMAN	50930	Mitochondrial ribosomal protein S30 variant (Fragment)	2	67.94
Q10713	MPPA_HUMAN	58728.8	Mitochondrial-processing peptidase subunit alpha	1	56.45
P28482	MK01_HUMAN	41762.4	Mitogen-activated protein kinase 1	2	189.54
P31152	MK04_HUMAN	66393.3	Mitogen-activated protein kinase 4	1	42.43
Q9UHA4	MPKS1_HUMAN	13671.3	Mitogen-activated protein kinase scaffold protein 1	3	333.23
Q9Y2Q5	MAPIP_HUMAN	13612.9	Mitogen-activated protein-binding protein-interacting protein	3	355.23
O43684	BUB3_HUMAN	37587.3	Mitotic checkpoint protein BUB3	9	1451.35
Q13257	MD2L1_HUMAN	23666.3	Mitotic spindle assembly checkpoint protein MAD2A	6	519.38
Q9BYG3	MK67I_HUMAN	34372.1	MKI67 FHA domain-interacting nucleolar phosphoprotein	13	2291.58
A5D8W6	A5D8W6_HUMAN	37351.3	Mortality factor 4 like 1	6	743.71
Q969Z3	MOSC2_HUMAN	38568.9	MOSC domain-containing protein 2, mitochondrial	1	139.17
Q9UJG1	MSPD1_HUMAN	24355.9	Motile sperm domain-containing protein 1	3	207.51
Q53HB4	Q53HB4_HUMAN	19039.6	M-phase phosphoprotein 6 variant (Fragment)	3	402.03
Q99549	MPP8_HUMAN	97636	M-phase phosphoprotein 8	4	339.87
Q9H8S9	MOL1B_HUMAN	25234.7	Mps one binder kinase activator-like 1B	2	164.87
Q567V2	M17L2_HUMAN	23507.1	Mpv17-like protein 2	3	932.67
Q9NV56	MRGBP_HUMAN	22574	MRG-binding protein	2	236.6
P78406	RAE1L_HUMAN	41569.1	mRNA export factor	15	1811.68
Q9UKD2	MRT4_HUMAN	27657	mRNA turnover protein 4 homolog	13	1494.11
Q8IY71	Q8IY71_HUMAN	15811.6	MRPS17 protein (Fragment)	2	250.42
Q3KRB4	Q3KRB4_HUMAN	13362.2	MRPS33 protein (Fragment)	1	73.77
Q96T58	MINT_HUMAN	403030	Msx2-interacting protein	18	870.38
P22234	PUR6_HUMAN	47790.4	Multifunctional protein ADE2	2	57.5
Q9BU76	MMTA2_HUMAN	29679	Multiple myeloma tumor-associated protein 2	3	386.75
Q9NR56	MBNL1_HUMAN	42531.3	Muscleblind-like protein 1	4	171.21
Q9BQG0	MBB1A_HUMAN	149731	Myb-binding protein 1A	52	5973.05
A8K265	A8K265_HUMAN	17191.4	MYC associated factor X, isoform CRA_f	6	1319.3
Q6IB68	Q6IB68_HUMAN	11945.3	MYCBP protein	7	477.3
Q9P2K5	MYEF2_HUMAN	64366.7	Myelin expression factor 2	6	498.88
B2RWP9	B2RWP9_HUMAN	230858	MYH10 protein	18	1016.75
Q4LE45	Q4LE45_HUMAN	234732	MYH10 variant protein (Fragment)	20	1240.12
Q6IBG5	Q6IBG5_HUMAN	13018.4	MYL6 protein	6	1920.85
P60660	MYL6_HUMAN	17090.2	Myosin light polypeptide 6	9	2653.39
B9EGI2	B9EGI2_HUMAN	118773	Myosin phosphatase Rho interacting protein	12	762.33
P19105	ML12A_HUMAN	19838.5	Myosin regulatory light chain 12A	9	1410.26
P35579	MYH9_HUMAN	227646	Myosin-9	28	1574.39
O43795	MYO1B_HUMAN	132928	Myosin-Ib	20	1946.48
O00159	MYO1C_HUMAN	122503	Myosin-Ic	13	720.16
O94832	MYO1D_HUMAN	116927	Myosin-Id	24	1731.62
Q9NQX4	MYO5C_HUMAN	203978	Myosin-Vc	3	113.17
Q9UM54	MYO6_HUMAN	150965	Myosin-VI	26	2671.81
Q96H55	MYO19_HUMAN	110776	Myosin-XIX	2	72.46
Q92614	MY18A_HUMAN	234168	Myosin-XVIIIa	9	639.62
P58546	MTPN_HUMAN	13057.7	Myotrophin	2	401.35
P29966	MARCS_HUMAN	31706.9	Myristoylated alanine-rich C-kinase substrate	2	255.08
O94760	DDAH1_HUMAN	31444.1	N(G),N(G)-dimethylarginine dimethylaminohydrolase 1	1	79.72
O95865	DDAH2_HUMAN	29910.6	N(G),N(G)-dimethylarginine dimethylaminohydrolase 2	4	510.88
Q86U44	MTA70_HUMAN	65174.8	N6-adenosine-methyltransferase 70 kDa subunit	3	77.69
Q9H0A0	NAT10_HUMAN	116543	N-acetyltransferase 10	24	2507.82
Q86UY6	NAT11_HUMAN	27746.3	N-acetyltransferase 11	7	655.91
Q9GZZ1	NAT13_HUMAN	19614.1	N-acetyltransferase 13	8	602.25
Q8WUY8	NAT14_HUMAN	21807.7	N-acetyltransferase 14	1	106.79
P61599	NAT5_HUMAN	20412.2	N-acetyltransferase 5	1	81.97
Q8NFW8	NEUA_HUMAN	49032.9	N-acylneuraminate cytidylyltransferase	10	1218.4
B1B5R8	B1B5R8_HUMAN	19690.2	N-acylsphingosine amidohydrolase 1 (Fragment)	2	207.85
Q7Z518	Q7Z518_HUMAN	40993.1	NADH dehydrogenase	8	1036.15
Q53HG2	Q53HG2_HUMAN	52925.8	NADH dehydrogenase (Ubiquinone) Fe-S protein 2, 49kDa (NADH-coenzyme Q reductase) variant (Fragment)	1	57.42
Q8WU60	Q8WU60_HUMAN	51009.3	NADH dehydrogenase (Ubiquinone) flavoprotein 3, 10kDa	5	362.29
Q86Y39	NDUAB_HUMAN	15070.6	NADH dehydrogenase [ubiquinone] 1 alpha subcomplex subunit 11	7	1329.21
Q9UI09	NDUAC_HUMAN	17103.6	NADH dehydrogenase [ubiquinone] 1 alpha subcomplex subunit 12	12	1704.1
Q9P0J0	NDUAD_HUMAN	16687.6	NADH dehydrogenase [ubiquinone] 1 alpha subcomplex subunit 13	11	2920.92
O43678	NDUA2_HUMAN	11028.8	NADH dehydrogenase [ubiquinone] 1 alpha subcomplex subunit 2	4	650.64
O95167	NDUA3_HUMAN	9272.85	NADH dehydrogenase [ubiquinone] 1 alpha subcomplex subunit 3	2	58.73
O00483	NDUA4_HUMAN	9420.93	NADH dehydrogenase [ubiquinone] 1 alpha subcomplex subunit 4	4	646.66
Q16718	NDUA5_HUMAN	13507.2	NADH dehydrogenase [ubiquinone] 1 alpha subcomplex subunit 5	6	2142.74
P56556	NDUA6_HUMAN	15126.9	NADH dehydrogenase [ubiquinone] 1 alpha subcomplex subunit 6	7	1263.59
O95182	NDUA7_HUMAN	12600.6	NADH dehydrogenase [ubiquinone] 1 alpha subcomplex subunit 7	10	1192.21
P51970	NDUA8_HUMAN	20548.2	NADH dehydrogenase [ubiquinone] 1 alpha subcomplex subunit 8	10	1350.98
Q16795	NDUA9_HUMAN	42653.6	NADH dehydrogenase [ubiquinone] 1 alpha subcomplex subunit 9, mitochondrial	17	1598.66
O75438	NDUB1_HUMAN	7013.66	NADH dehydrogenase [ubiquinone] 1 beta subcomplex subunit 1	5	623.49
O96000	NDUBA_HUMAN	21048.3	NADH dehydrogenase [ubiquinone] 1 beta subcomplex subunit 10	13	1625.77
Q9NX14	NDUBB_HUMAN	17362.8	NADH dehydrogenase [ubiquinone] 1 beta subcomplex subunit 11, mitochondrial	3	433.59
O43676	NDUB3_HUMAN	11394.7	NADH dehydrogenase [ubiquinone] 1 beta subcomplex subunit 3	3	454.07
O95168	NDUB4_HUMAN	15256.1	NADH dehydrogenase [ubiquinone] 1 beta subcomplex subunit 4	5	863.35
O43674	NDUB5_HUMAN	21736.6	NADH dehydrogenase [ubiquinone] 1 beta subcomplex subunit 5, mitochondrial	6	1019.98
O95139	NDUB6_HUMAN	15479.1	NADH dehydrogenase [ubiquinone] 1 beta subcomplex subunit 6	3	414.45
P17568	NDUB7_HUMAN	16619.3	NADH dehydrogenase [ubiquinone] 1 beta subcomplex subunit 7	7	1053.12
O95169	NDUB8_HUMAN	21865.4	NADH dehydrogenase [ubiquinone] 1 beta subcomplex subunit 8, mitochondrial	4	778.19
Q9Y6M9	NDUB9_HUMAN	22044.9	NADH dehydrogenase [ubiquinone] 1 beta subcomplex subunit 9	7	1045.67
O95298	NDUC2_HUMAN	14235.4	NADH dehydrogenase [ubiquinone] 1 subunit C2	8	1106.69
P49821	NDUV1_HUMAN	51469.1	NADH dehydrogenase [ubiquinone] flavoprotein 1, mitochondrial	16	1881.27
P19404	NDUV2_HUMAN	27659.1	NADH dehydrogenase [ubiquinone] flavoprotein 2, mitochondrial	9	2314.16
P56181	NDUV3_HUMAN	11990.1	NADH dehydrogenase [ubiquinone] flavoprotein 3, mitochondrial	1	320.87
O75306	NDUS2_HUMAN	52910.9	NADH dehydrogenase [ubiquinone] iron-sulfur protein 2, mitochondrial	11	1294.49
O75489	NDUS3_HUMAN	30336.8	NADH dehydrogenase [ubiquinone] iron-sulfur protein 3, mitochondrial	12	2960.61
O43181	NDUS4_HUMAN	20095.4	NADH dehydrogenase [ubiquinone] iron-sulfur protein 4, mitochondrial	6	689.32
O43920	NDUS5_HUMAN	12737.5	NADH dehydrogenase [ubiquinone] iron-sulfur protein 5	6	993.75
O75380	NDUS6_HUMAN	14045	NADH dehydrogenase [ubiquinone] iron-sulfur protein 6, mitochondrial	5	1096.67
O75251	NDUS7_HUMAN	23833.2	NADH dehydrogenase [ubiquinone] iron-sulfur protein 7, mitochondrial	4	1042.94
O00217	NDUS8_HUMAN	24202.8	NADH dehydrogenase [ubiquinone] iron-sulfur protein 8, mitochondrial	5	1810.65
Q9UHQ9	NB5R1_HUMAN	34244.2	NADH-cytochrome b5 reductase 1	4	195.88
B4DUC1	B4DUC1_HUMAN	74392.7	NADH-ubiquinone oxidoreductase 75 kDa subunit	1	54.54
B4DJA0	B4DJA0_HUMAN	81971.8	NADH-ubiquinone oxidoreductase 75 kDa subunit	22	3550.84
A4GWV7	A4GWV7_HUMAN	35617	NADH-ubiquinone oxidoreductase chain 1	2	93.23
A4ZN04	A4ZN04_HUMAN	13262.1	NADH-ubiquinone oxidoreductase chain 3	1	321.74
Q13765	NACA_HUMAN	23369.7	Nascent polypeptide-associated complex subunit alpha	4	1210.66
Q15843	NEDD8_HUMAN	9065.95	NEDD8	2	291.9
P61081	UBC12_HUMAN	21171.8	NEDD8-conjugating enzyme Ubc12	6	283.01
O43402	CX4NB_HUMAN	24213.8	Neighbor of COX4	6	629.62
A5PKT9	A5PKT9_HUMAN	66040.9	NES protein (Fragment)	10	465.35
Q8WXH0	SYNE2_HUMAN	801817	Nesprin-2	27	976.18
Q6ZMZ3	SYNE3_HUMAN	112774	Nesprin-3	1	66.69
P48681	NEST_HUMAN	177788	Nestin	15	646
Q9UMX5	NENF_HUMAN	18844.8	Neudesin	2	252.56
Q96SB3	NEB2_HUMAN	89308.8	Neurabin-2	5	442.75
Q09666	AHNK_HUMAN	629213	Neuroblast differentiation-associated protein AHNAK	4	211.67
Q8NEJ9	NGDN_HUMAN	35872	Neuroguidin	5	245.98
Q9UBC1	IKBL1_HUMAN	43576.6	NF-kappa-B inhibitor-like protein 1	2	126.89
Q8N5F7	NKAP_HUMAN	47224.1	NF-kappa-B-activating protein	1	114
Q6NUN2	Q6NUN2_HUMAN	78339.5	NFKB repressing factor	18	1383.53
Q9UMS0	NFU1_HUMAN	28615.4	NFU1 iron-sulfur cluster scaffold homolog, mitochondrial	3	251.26
P55769	NH2L1_HUMAN	14392.6	NHP2-like protein 1	8	1582.91
O60934	NBN_HUMAN	85590.2	Nibrin	2	121.97
Q53GL1	Q53GL1_HUMAN	32128.6	Nicotinamide nucleotide adenylyltransferase 1 variant (Fragment)	1	75.73
Q2TB59	Q2TB59_HUMAN	114552	Nicotinamide nucleotide transhydrogenase	11	817.01
Q6KC79	NIPBL_HUMAN	317907	Nipped-B-like protein	37	2200.21
Q9BZM4	N2DL3_HUMAN	28273.2	NKG2D ligand 3	2	114.45
P30414	NKTR_HUMAN	166603	NK-tumor recognition protein	5	139.14
Q16466	Q16466_HUMAN	12735.3	Non-histone chromosomal protein (Fragment)	3	1054.35
P05114	HMGN1_HUMAN	10652.6	Non-histone chromosomal protein HMG-14	5	348.35
P05204	HMGN2_HUMAN	9387.06	Non-histone chromosomal protein HMG-17	2	263.04
Q9H9Q4	NHEJ1_HUMAN	33715.1	Non-homologous end-joining factor 1	2	100.94
Q15233	NONO_HUMAN	54311.3	Non-POU domain-containing octamer-binding protein	23	2709.87
Q6NUR1	Q6NUR1_HUMAN	115205	Non-SMC condensin I complex, subunit G	1	149.52
Q9NXX6	NSE4A_HUMAN	44388.2	Non-SMC element 4 homolog A	5	287.82
Q3KQS4	Q3KQS4_HUMAN	93202	NOP2 protein	19	2501.7
Q5VY36	Q5VY36_HUMAN	23508.2	Novel protein similar to ribosomal protein L13a RPL13A	1	379
Q6PHZ7	Q6PHZ7_HUMAN	58381.3	NR2C2 protein	1	55.76
Q9UKK6	NXT1_HUMAN	16064.7	NTF2-related export protein 1	5	544.96
Q9NPJ8	NXT2_HUMAN	16388.9	NTF2-related export protein 2	2	240.77
P23497	SP100_HUMAN	101495	Nuclear autoantigen Sp-100	2	85.46
Q53H03	Q53H03_HUMAN	85469.2	Nuclear autoantigenic sperm protein isoform 2 variant (Fragment)	3	171.83
Q09161	NCBP1_HUMAN	92863.9	Nuclear cap-binding protein subunit 1	23	2424
P52298	NCBP2_HUMAN	18160.8	Nuclear cap-binding protein subunit 2	6	1076.84
Q96HA1	P121A_HUMAN	128098	Nuclear envelope pore membrane protein POM 121	11	779.96
A8CG34	P121C_HUMAN	125382	Nuclear envelope pore membrane protein POM 121C	12	832.18
Q12972	PP1R8_HUMAN	38625.9	Nuclear inhibitor of protein phosphatase 1	10	843.16
A4D1L4	A4D1L4_HUMAN	54651.8	Nuclear interacting partner of anaplastic lymphoma kinase (ALK)	1	71.67
Q9Y266	NUDC_HUMAN	38276.2	Nuclear migration protein nudC	6	262.7
Q59HB8	Q59HB8_HUMAN	178716	Nuclear mitotic apparatus protein 1 variant (Fragment)	42	3053.88
Q13901	C1D_HUMAN	16009.3	Nuclear nucleic acid-binding protein C1D	2	58.78
P57740	NU107_HUMAN	107048	Nuclear pore complex protein Nup107	36	3494.11
Q8WUM0	NU133_HUMAN	129924	Nuclear pore complex protein Nup133	35	3555.68
P49790	NU153_HUMAN	155440	Nuclear pore complex protein Nup153	41	3631.48
O75694	NU155_HUMAN	156697	Nuclear pore complex protein Nup155	40	4762.88
Q12769	NU160_HUMAN	164355	Nuclear pore complex protein Nup160	42	4301.55
Q92621	NU205_HUMAN	230170	Nuclear pore complex protein Nup205	64	6127.89
P35658	NU214_HUMAN	214230	Nuclear pore complex protein Nup214	29	2184.89
Q99567	NUP88_HUMAN	84629.2	Nuclear pore complex protein Nup88	14	1129.17
Q8N1F7	NUP93_HUMAN	93942.8	Nuclear pore complex protein Nup93	31	2863.47
P52948	NUP98_HUMAN	188643	Nuclear pore complex protein Nup98-Nup96	18	2307.72
P37198	NUP62_HUMAN	53393.5	Nuclear pore glycoprotein p62	12	1843.01
Q8TEM1	PO210_HUMAN	205895	Nuclear pore membrane glycoprotein 210	29	2348.67
P82979	HCC1_HUMAN	23713.5	Nuclear protein Hcc-1	9	731.31
Q49A26	NP60_HUMAN	61079.2	Nuclear protein NP60	2	102.72
Q9HCD5	NCOA5_HUMAN	65724.6	Nuclear receptor coactivator 5	13	737.47
P10588	NR2F6_HUMAN	43635.9	Nuclear receptor subfamily 2 group F member 6	3	114.96
B6ZGT7	B6ZGT7_HUMAN	48092.8	Nuclear receptor subfamily 2, group C isoform	2	66.19
Q9UBU9	NXF1_HUMAN	70651.9	Nuclear RNA export factor 1	21	2372.54
P23511	NFYA_HUMAN	36853.9	Nuclear transcription factor Y subunit alpha	1	111.58
P25208	NFYB_HUMAN	22988	Nuclear transcription factor Y subunit beta	2	86.92
Q5T6K5	Q5T6K5_HUMAN	34533.4	Nuclear transcription factor Y, gamma (Fragment)	4	482.18
P61970	NTF2_HUMAN	14640.1	Nuclear transport factor 2	3	614.17
Q9H1E3	NUCKS_HUMAN	27280	Nuclear ubiquitous casein and cyclin-dependent kinases substrate	2	555.88
P67809	YBOX1_HUMAN	35902.7	Nuclease-sensitive element-binding protein 1	12	1690.21
Q9Y3T9	NOC2L_HUMAN	85707.5	Nucleolar complex protein 2 homolog	12	1278.44
Q8WTT2	NOC3L_HUMAN	92945.7	Nucleolar complex protein 3 homolog	11	752.77
Q9BVI4	NOC4L_HUMAN	58829.8	Nucleolar complex protein 4 homolog	17	1197.48
Q9BZE4	NOG1_HUMAN	74317	Nucleolar GTP-binding protein 1	25	2822.17
Q13823	NOG2_HUMAN	83831.5	Nucleolar GTP-binding protein 2	9	880.13
Q5C9Z4	NOM1_HUMAN	96767.8	Nucleolar MIF4G domain-containing protein 1	1	98.3
Q14978	NOLC1_HUMAN	73559.6	Nucleolar phosphoprotein p130	12	659.84
O60287	NPA1P_HUMAN	256522	Nucleolar pre-ribosomal-associated protein 1	14	1036.23
Q9H8H0	NOL11_HUMAN	82041.3	Nucleolar protein 11	12	765.55
P78316	NOP14_HUMAN	98291.6	Nucleolar protein 14	15	1089.74
Q9Y3C1	NOP16_HUMAN	21232.1	Nucleolar protein 16	11	1877.16
O00567	NOP56_HUMAN	66407.9	Nucleolar protein 56	29	2474.8
Q9Y2X3	NOP58_HUMAN	60053.7	Nucleolar protein 58	26	2990.79
Q9H6R4	NOL6_HUMAN	128368	Nucleolar protein 6	14	1361.42
Q9UMY1	NOL7_HUMAN	29465.5	Nucleolar protein 7	3	381.57
Q76FK4	NOL8_HUMAN	132448	Nucleolar protein 8	1	68.27
Q5SY16	NOL9_HUMAN	80526.7	Nucleolar protein 9	6	423.65
Q9NR30	DDX21_HUMAN	87803.6	Nucleolar RNA helicase 2	35	3365.1
P17480	UBF1_HUMAN	89692.4	Nucleolar transcription factor 1	11	977.68
P19338	NUCL_HUMAN	76625.4	Nucleolin	22	3069.81
P06748	NPM_HUMAN	32725.9	Nucleophosmin	13	4509.72
O75607	NPM3_HUMAN	19616.5	Nucleoplasmin-3	6	1273.24
Q7Z743	Q7Z743_HUMAN	155487	Nucleoporin 153kDa	2	72.15
Q9UKX7	NUP50_HUMAN	50512.3	Nucleoporin 50 kDa	19	3729.87
Q53H29	Q53H29_HUMAN	55643.4	Nucleoporin 54kDa variant (Fragment)	17	2835.78
Q53GS7	GLE1_HUMAN	80355.8	Nucleoporin GLE1	10	910.76
Q5SRE5	NU188_HUMAN	198369	Nucleoporin NUP188 homolog	38	2785.52
Q8NFH4	NUP37_HUMAN	37140.2	Nucleoporin Nup37	6	1002.99
Q8NFH3	NUP43_HUMAN	42580.6	Nucleoporin Nup43	9	1104.72
Q8NFH5	NUP53_HUMAN	34865.5	Nucleoporin NUP53	10	1346.74
Q9BW27	NUP85_HUMAN	75826.4	Nucleoporin NUP85	25	2351.85
Q96EE3	SEH1L_HUMAN	47119.1	Nucleoporin SEH1-like	8	931.14
P12270	TPR_HUMAN	267530	Nucleoprotein TPR	71	5647.21
Q6DKJ4	NXN_HUMAN	48760.8	Nucleoredoxin	1	93.18
Q32Q12	Q32Q12_HUMAN	32906	Nucleoside diphosphate kinase	15	3138.13
Q9NUF9	Q9NUF9_HUMAN	17456.1	Nucleoside diphosphate kinase (Fragment)	4	450.45
O75414	NDK6_HUMAN	21299.9	Nucleoside diphosphate kinase 6	1	56.96
P15531	NDKA_HUMAN	17308.7	Nucleoside diphosphate kinase A	11	2280.35
Q9BSD7	CA057_HUMAN	20928.2	Nucleoside-triphosphatase C1orf57	7	843.22
P82970	NSBP1_HUMAN	31505.9	Nucleosome-binding protein 1	2	65.33
Q9UDJ6	Q9UDJ6_HUMAN	3136.63	Nucleotide diphosphate kinase subunit A, P19/NM23-H1	3	161.87
Q96RE7	NACC1_HUMAN	57906.1	Nucleus accumbens-associated protein 1	1	92.74
Q8WVJ2	NUDC2_HUMAN	17835.8	NudC domain-containing protein 2	2	94.17
Q4LE64	Q4LE64_HUMAN	239798	NUMA1 variant protein (Fragment)	51	3731.4
Q8N6V5	Q8N6V5_HUMAN	47232.8	NUP50 protein	9	530.62
Q9NTK5	OLA1_HUMAN	44943.4	Obg-like ATPase 1	2	286.37
Q9NX40	OCAD1_HUMAN	27779.8	OCIA domain-containing protein 1	5	362.65
Q56VL3	OCAD2_HUMAN	17284.7	OCIA domain-containing protein 2	8	1886.7
Q9Y3B8	ORN_HUMAN	27043.7	Oligoribonuclease, mitochondrial	1	63.81
Q9NRP0	OSTC_HUMAN	16931.9	Oligosaccharyltransferase complex subunit OSTC	3	358.83
Q13416	ORC2_HUMAN	65987.9	Origin recognition complex subunit 2	1	94.24
Q9UBD5	ORC3_HUMAN	83284.9	Origin recognition complex subunit 3	7	618.27
O43929	ORC4_HUMAN	50744.2	Origin recognition complex subunit 4	1	77.9
O43913	ORC5_HUMAN	50764.4	Origin recognition complex subunit 5	4	372.09
Q53FV1	ORML2_HUMAN	17352.3	ORM1-like protein 2	1	97.73
P04181	OAT_HUMAN	48846.3	Ornithine aminotransferase, mitochondrial	6	723.47
Q6IAV5	Q6IAV5_HUMAN	56612.1	OXCT protein	1	77.79
Q5HYM3	Q5HYM3_HUMAN	101862	Oxysterol-binding protein	3	308.81
Q9NWT1	PK1IP_HUMAN	44506.1	p21-activated protein kinase-interacting protein 1	2	107.7
Q96TD5	Q96TD5_HUMAN	26845.3	P27BBP protein	7	1502.07
Q12771	Q12771_HUMAN	31689.8	P37 AUF1	4	238.53
Q96FX8	PERP_HUMAN	21999	p53 apoptosis effector related to PMP-22	1	100.2
Q49AE6	Q49AE6_HUMAN	15017.9	PAIP2 protein	1	119.76
Q96ST3	SIN3A_HUMAN	145883	Paired amphipathic helix protein Sin3a	12	951.65
Q6P1J9	CDC73_HUMAN	60653.1	Parafibromin	10	602.83
P20962	PTMS_HUMAN	11523.2	Parathymosin	1	57.83
Q9BRP8	WIBG_HUMAN	22642	Partner of Y14 and mago	1	110.24
O75475	PSIP1_HUMAN	60180.7	PC4 and SFRS1-interacting protein	13	1014.09
Q6FGB3	Q6FGB3_HUMAN	12059.1	PCBD protein (Fragment)	1	268.71
Q5JVF3	PCID2_HUMAN	46627	PCI domain-containing protein 2	10	827.96
B9EIS5	B9EIS5_HUMAN	229186	PCM1 protein	13	740.88
B7ZKW5	B7ZKW5_HUMAN	19982.8	PDDC1 protein	2	57.67
A9IYQ1	A9IYQ1_HUMAN	33728.9	PDS5, regulator of cohesion maintenance, homolog B (S. cerevisiae) (Fragment)	5	444.4
O00151	PDLI1_HUMAN	36505.2	PDZ and LIM domain protein 1	3	199.68
Q5EBL8	PDZ11_HUMAN	16121.3	PDZ domain-containing protein 11	3	230.99
O14908	GIPC1_HUMAN	36140.7	PDZ domain-containing protein GIPC1	6	595.15
Q6FHL9	Q6FHL9_HUMAN	15115.8	PEA15 protein	1	140.74
Q9UBV8	PEF1_HUMAN	30646.4	Peflin	1	115.65
Q96EY7	PTCD3_HUMAN	79184	Pentatricopeptide repeat-containing protein 3, mitochondrial	2	54.65
Q8IYS1	P20D2_HUMAN	48088.1	Peptidase M20 domain-containing protein 2	1	80.79
Q9HBH1	DEFM_HUMAN	27452.2	Peptide deformylase, mitochondrial	7	593.11
B2R6X6	B2R6X6_HUMAN	22367.3	Peptidyl-prolyl cis-trans isomerase	5	1007.87
A8K486	A8K486_HUMAN	18229.9	Peptidyl-prolyl cis-trans isomerase	15	3737.96
B4DN80	B4DN80_HUMAN	33470.1	Peptidyl-prolyl cis-trans isomerase	5	786.49
P23284	PPIB_HUMAN	23784.6	Peptidyl-prolyl cis-trans isomerase B	13	2980.53
P45877	PPIC_HUMAN	22862.9	Peptidyl-prolyl cis-trans isomerase C	1	246.92
Q9UNP9	PPIE_HUMAN	33694.7	Peptidyl-prolyl cis-trans isomerase E	5	285.73
P62942	FKB1A_HUMAN	12000.1	Peptidyl-prolyl cis-trans isomerase FKBP1A	4	835.74
Q13427	PPIG_HUMAN	89077.3	Peptidyl-prolyl cis-trans isomerase G	10	1297.38
O43447	PPIH_HUMAN	19480.7	Peptidyl-prolyl cis-trans isomerase H	9	890.15
Q13526	PIN1_HUMAN	18346	Peptidyl-prolyl cis-trans isomerase NIMA-interacting 1	7	1748.57
Q6UX04	SDC10_HUMAN	53985.2	Peptidyl-prolyl cis-trans isomerase SDCCAG10	2	64.67
Q9Y3C6	PPIL1_HUMAN	18339.2	Peptidyl-prolyl cis-trans isomerase-like 1	8	1248.74
Q8WUA2	PPIL4_HUMAN	57702.7	Peptidyl-prolyl cis-trans isomerase-like 4	2	74.5
P55201	BRPF1_HUMAN	139066	Peregrin	3	193.24
Q15154	PCM1_HUMAN	229998	Pericentriolar material 1 protein	13	635.41
Q15269	PWP2_HUMAN	103357	Periodic tryptophan protein 2 homolog	14	1247.96
Q8NEY8	PPHLN_HUMAN	52819.1	Periphilin-1	3	252.39
Q06830	PRDX1_HUMAN	22324.4	Peroxiredoxin-1	13	1788.42
P32119	PRDX2_HUMAN	22049.3	Peroxiredoxin-2	7	922.17
Q13162	PRDX4_HUMAN	30748.9	Peroxiredoxin-4	3	100.42
P30044	PRDX5_HUMAN	22297.6	Peroxiredoxin-5, mitochondrial	7	1016.29
P30041	PRDX6_HUMAN	25133.2	Peroxiredoxin-6	9	1620.65
Q9NR77	PXMP2_HUMAN	22238	Peroxisomal membrane protein 2	4	547.53
Q6GU86	Q6GU86_HUMAN	35667.3	Peroxisomal membrane protein 3, 35kDa	1	58.28
P51659	DHB4_HUMAN	80092.5	Peroxisomal multifunctional enzyme type 2	2	73.15
O00541	PESC_HUMAN	68359.1	Pescadillo homolog	21	2097.32
Q8WW12	PCNP_HUMAN	18913.4	PEST proteolytic signal-containing nuclear protein	4	435.5
Q6GMQ3	Q6GMQ3_HUMAN	100765	PHC1 protein	1	86.31
O75151	PHF2_HUMAN	121669	PHD finger protein 2	9	647.25
Q92576	PHF3_HUMAN	231563	PHD finger protein 3	9	505.81
Q8IWS0	PHF6_HUMAN	42404.4	PHD finger protein 6	8	489.6
Q7RTV0	PHF5A_HUMAN	13138.2	PHD finger-like domain-containing protein 5A	7	960.21
Q9Y285	SYFA_HUMAN	57584.5	Phenylalanyl-tRNA synthetase alpha chain	4	301.5
Q8WWQ0	PHIP_HUMAN	208285	PH-interacting protein	5	304.32
P30086	PEBP1_HUMAN	21157.7	Phosphatidylethanolamine-binding protein 1	8	1359.91
O00443	P3C2A_HUMAN	192156	Phosphatidylinositol-4-phosphate 3-kinase C2 domain-containing alpha polypeptide	3	61.65
O95394	AGM1_HUMAN	60270.4	Phosphoacetylglucosamine mutase	2	110.57
P00558	PGK1_HUMAN	44985.3	Phosphoglycerate kinase 1	10	968.93
P18669	PGAM1_HUMAN	28899.9	Phosphoglycerate mutase 1	8	713.44
Q96HS1	PGAM5_HUMAN	32212.7	Phosphoglycerate mutase family member 5	16	1564.8
P36969	GPX4_HUMAN	22674.2	Phospholipid hydroperoxide glutathione peroxidase, mitochondrial	4	296.86
Q3B7A7	Q3B7A7_HUMAN	108909	Phosphoribosylglycinamide formyltransferase, phosphoribosylglycinamide synthetase, phosphoribosylaminoimidazole synthetase	3	104.28
Q9H814	PHAX_HUMAN	44546.2	Phosphorylated adapter RNA export protein	1	117.76
Q9Y617	SERC_HUMAN	40796	Phosphoserine aminotransferase	2	110.25
Q6NYC8	PHTNS_HUMAN	68186.6	Phostensin	4	267.72
B7ZM66	B7ZM66_HUMAN	180080	PHRF1 protein	2	118.47
Q4LE69	Q4LE69_HUMAN	241110	PIK4CA variant protein (Fragment)	1	70.35
Q0D2H3	Q0D2H3_HUMAN	15116.6	PIN4 protein (Fragment)	5	806.02
Q9H307	PININ_HUMAN	81679	Pinin	23	1902.94
O00625	PIR_HUMAN	32207.3	Pirin	1	86.15
A0AV37	A0AV37_HUMAN	93154.7	Plakophilin 2	12	733.23
Q9Y446	PKP3_HUMAN	87485.2	Plakophilin-3	10	949.96
Q8NC51	PAIRB_HUMAN	44995.5	Plasminogen activator inhibitor 1 RNA-binding protein	8	883.58
Q14651	PLSI_HUMAN	70608.4	Plastin-1	16	1252.84
P13796	PLSL_HUMAN	70815.1	Plastin-2	20	2857.89
P13797	PLST_HUMAN	71279.4	Plastin-3	34	4815.38
P68402	PA1B2_HUMAN	25724.2	Platelet-activating factor acetylhydrolase IB subunit beta	1	352.15
Q15102	PA1B3_HUMAN	25832.3	Platelet-activating factor acetylhydrolase IB subunit gamma	2	533.84
Q15149	PLEC1_HUMAN	533462	Plectin-1	102	7231.52
Q7Z3K3	POGZ_HUMAN	157355	Pogo transposable element with ZNF domain	17	809.25
P09874	PARP1_HUMAN	113811	Poly [ADP-ribose] polymerase 1	45	5837.21
O95453	PARN_HUMAN	73918	Poly(A)-specific ribonuclease PARN	5	592.25
Q15365	PCBP1_HUMAN	37987.1	Poly(rC)-binding protein 1	15	2197.36
Q59HD4	Q59HD4_HUMAN	39899.4	Poly(RC)-binding protein 2 isoform b variant (Fragment)	13	2711.83
Q9UHX1	PUF60_HUMAN	60008.7	Poly(U)-binding-splicing factor PUF60	13	2417.15
P11940	PABP1_HUMAN	70853.9	Polyadenylate-binding protein 1	20	2556.57
Q86U42	PABP2_HUMAN	32843	Polyadenylate-binding protein 2	5	746.09
Q13310	PABP4_HUMAN	71080.2	Polyadenylate-binding protein 4	9	805.72
Q9H074	PAIP1_HUMAN	53947.3	Polyadenylate-binding protein-interacting protein 1	1	82.51
Q6P1K2	PMF1_HUMAN	23495.9	Polyamine-modulated factor 1	3	465.23
Q9BSM1	PCGF1_HUMAN	30953.8	Polycomb group RING finger protein 1	4	388.24
O75530	EED_HUMAN	50906.9	Polycomb protein EED	8	337.19
Q15022	SUZ12_HUMAN	83743.9	Polycomb protein SUZ12	12	778.43
O60828	PQBP1_HUMAN	30511	Polyglutamine-binding protein 1	8	1070.51
Q5JTE4	Q5JTE4_HUMAN	36043.3	Polymerase (RNA) I polypeptide C, 30kDa	7	1136.15
B2R6L4	B2R6L4_HUMAN	24709.8	Polymerase (RNA) II (DNA directed) polypeptide E, 25kDa, isoform CRA_b	11	852.22
Q9BY77	PDIP3_HUMAN	46288.6	Polymerase delta-interacting protein 3	16	1165.53
P26599	PTBP1_HUMAN	57356.7	Polypyrimidine tract-binding protein 1	18	4665.87
Q8TCS8	PNPT1_HUMAN	86523.9	Polyribonucleotide nucleotidyltransferase 1, mitochondrial	2	117.6
P08397	HEM3_HUMAN	39533.7	Porphobilinogen deaminase	1	60.59
Q03052	PO3F1_HUMAN	45695.6	POU domain, class 3, transcription factor 1	1	138.22
P20265	PO3F2_HUMAN	47092.1	POU domain, class 3, transcription factor 2	4	238.2
Q6PEG1	Q6PEG1_HUMAN	33582.4	PPP2R2D protein (Fragment)	1	81.09
P40425	PBX2_HUMAN	46137.6	Pre-B-cell leukemia transcription factor 2	5	176.99
[truncated: 1,012 more rows]
